# Supplementary material for: Population-level impact of diabetes integrated care on commissioner payments for inpatient care among people with type 2 diabetes in Cambridgeshire: a postintervention cohort follow-up study
Source: PubMed Central journal article supplement — BMJ Open. 2017 Dec 28;7(12):e015816. doi: 10.1136/bmjopen-2017-015816 (PMC5770819; doi:10.1136/bmjopen-2017-015816), 2017-12-28
Supplement: bmjopen-2017-015816.draft_revisions.pdf [file bmjopen-2017-015816.draft_revisions.pdf]

# BMJ Open

BMJ Open is committed to open peer review. As part of this commitment we make the peer review history of every article we publish publicly available.

When an article is published we post the peer reviewers' comments and the authors' responses online. We also post the versions of the paper that were used during peer review. These are the versions that the peer review comments apply to.

The versions of the paper that follow are the versions that were submitted during the peer review process. They are not the versions of record or the final published versions. They should not be cited or distributed as the published version of this manuscript.

BMJ Open is an open access journal and the full, final, typeset and author-corrected version of record of the manuscript is available on our site with no access controls, subscription charges or pay-per-view fees (<http://bmjopen.bmj.com>).

If you have any questions on BMJ Open's open peer review process please email [editorial.bmjopen@bmj.com](mailto:editorial.bmjopen@bmj.com)

# BMJ Open

## Population-level impact of diabetes integrated care on payments for inpatient care among people with type 2 diabetes in Cambridgeshire

|                                 |                                                                                                                                                                                                                                                                                                                                                                                                                                                                                                                                                                                                                                        |
|---------------------------------|----------------------------------------------------------------------------------------------------------------------------------------------------------------------------------------------------------------------------------------------------------------------------------------------------------------------------------------------------------------------------------------------------------------------------------------------------------------------------------------------------------------------------------------------------------------------------------------------------------------------------------------|
| Journal:                        | <i>BMJ Open</i>                                                                                                                                                                                                                                                                                                                                                                                                                                                                                                                                                                                                                        |
| Manuscript ID                   | bmjopen-2017-015816                                                                                                                                                                                                                                                                                                                                                                                                                                                                                                                                                                                                                    |
| Article Type:                   | Research                                                                                                                                                                                                                                                                                                                                                                                                                                                                                                                                                                                                                               |
| Date Submitted by the Author:   | 02-Jan-2017                                                                                                                                                                                                                                                                                                                                                                                                                                                                                                                                                                                                                            |
| Complete List of Authors:       | Yu, Dahai; the First Affiliated Hospital, Zhengzhou University, Department of Nephrology; Keele University, Arthritis Research UK Primary Care Centre, Research Institute for Primary Care & Health Sciences<br>Yang, Wei; the First Affiliated Hospital, Zhengzhou University, Department of Nephrology; Washington University in St Louis, School of Medicine<br>cai, yamei; the First Affiliated Hospital, Zhengzhou University, Department of Nephrology<br>Zhao, Zhanzheng; the First Affiliated Hospital, Zhengzhou University, Department of Nephrology<br>Simmons, David; Western Sydney University, Macarthur Clinical School |
| <b>Primary Subject Heading</b>: | Diabetes and endocrinology                                                                                                                                                                                                                                                                                                                                                                                                                                                                                                                                                                                                             |
| Secondary Subject Heading:      | Research methods                                                                                                                                                                                                                                                                                                                                                                                                                                                                                                                                                                                                                       |
| Keywords:                       | intergrated care, Diabetes, Intervention studies, Area under the curve                                                                                                                                                                                                                                                                                                                                                                                                                                                                                                                                                                 |
|                                 |                                                                                                                                                                                                                                                                                                                                                                                                                                                                                                                                                                                                                                        |

SCHOLARONE™  
Manuscripts

only

**Title Page**

**Title:** Population-level impact of diabetes integrated care on payments for inpatient care among people with type 2 diabetes in Cambridgeshire

**Authors:** Dahai Yu <sup>1,2</sup>, Wei Yang <sup>1,3</sup>, Yamei Cai <sup>1</sup>, Zhanzheng Zhao <sup>1\*</sup>, David Simmons <sup>4\*</sup>

1. Department of Nephrology, the First Affiliated Hospital, Zhengzhou University, Zhengzhou 450052, China

2. Arthritis Research UK Primary Care Centre, Research Institute for Primary Care & Health Sciences, Keele University, Keele ST5 5BG, UK

3. School of Medicine, Washington University in St Louis, 660 S Euclid Ave, St. Louis, MO 63110, United States

4. Western Sydney University, Campbelltown, Sydney NSW 2751, Australia

**\*Correspondence 1 (China):**

Professor Zhanzheng Zhao, Department of Nephrology, The First Affiliated Hospital

Zhengzhou University, Zhengzhou 450052, CHINA

Email: [zhanzhengzhao@zzu.edu.cn](mailto:zhanzhengzhao@zzu.edu.cn)

TEL:+86 139 3852 5666

FAX:+86 371 6698 8753

**\*Correspondence 2 (Australia):**

Professor David Simmons, Macarthur Clinical School, School of Medicine, Western Sydney University, Locked Bag 1797, Campbelltown NSW 2751, AUSTRALIA

Email: [dsworkster@gmail.com](mailto:dsworkster@gmail.com)

TEL: (61+2) 4620 3899

FAX: (61+2) 4620 3890

Words in the main text: 1,786

Words in the abstract: 216

Tables: 2

Figures: 1

References: 24

Online Appendix: 1

Keywords: Diabetes; Integrated care; Intervention studies; Area under the curve

1  
2  
3 Abstract

4  
5 **Objectives**

6 Few studies have estimated the impact of diabetes integrated care at a population level.  
7 We have assessed the impact of introducing a community service led diabetes integrated  
8 care programme on inpatient payments (tariff) in rural England.  
9

10  
11 **Methods**

12 The Diabetes Integrated Care Initiative (DICI) was delivered by a separate enhanced  
13 community diabetes service, increasing specialist nursing, dietetic, podiatry and medical  
14 support to primary care and patients, while linking into other diabetes specialist services.  
15 Tariff data was provided by the local authority. The area between the two overlapping  
16 distribution curves of inpatient cost at baseline and follow-up (at 3 years) was used to  
17 estimate the impact of integrated care on inpatient payments on a population level.  
18

19  
20 **Results**

21 Over the three-year period, reduced inpatient payments occurred in 2.7 (1.3 to 5.8)% of  
22 patients with diabetes aged more than 70 years in the Intervention area. However,  
23 reduced diabetes inpatient payments occurred in 3.20 (1.77 to 7.20)% of patients aged <70  
24 years and 4.1 (2.3 to 7.9)% of patients ≥aged more than 70 years in one of the two  
25 adjacent areas.  
26

27  
28 **Conclusion**

29 This enhanced community diabetes services was not associated with substantially  
30 reduced inpatient payments. Alternative diabetes integrated care approaches (eg with  
31 direct primary and secondary care collaboration rather than with a community service)  
32 should be tested.  
33  
34  
35  
36  
37  
38  
39  
40  
41  
42  
43  
44  
45  
46  
47  
48  
49  
50  
51  
52  
53  
54  
55  
56  
57  
58  
59  
60

**Strengths and limitations of this study**

- This study raised a revised novel method to calculate the impact of interventions at population-level by comparing the distribution curves before and after the intervention.
- The ‘health gain’ in the revised method was clearly defined with formulated algorithm of evaluation, which broadened the utilization scenarios especially when the negative values was raised.
- With application of this novel method, this study found that the integrated diabetes care was not associated with substantially reduced inpatient payments.
- The data used in this study depended on the completeness of the coding of diabetes, although there being no systematic change in coding over this time period.

## Introduction

As the social and economic impact of diabetes grows, so does the variety of attempts to improve care quality and reduce health care costs among those affected [1, 2, 3]. One approach, able to provide at least equivalent care to routine medical care with some types of patients, has been the introduction of nurses working within protocols, within medical services [4]. Other models known as ‘intermediate care’, including general practitioners with a special interest [5], and community diabetes nursing services [5] have been implemented, but without robust evaluation. As a proposed system, integrated care articulates all health workers and health systems around the needs of each patient and should be associated with improved outcomes and less cost [6].

However, the impact of a population based integrated care intervention is difficult to measure on an individual level. One randomised trial of an intermediate care service showed no impact on outcomes at greater cost [7]. By their nature, randomised controlled trials are difficult to utilise for assessing the impact of a complete system change at a population level, even using a cluster approach. Sarkadi et al have proposed a method to look at population outcomes in their own right in the quest of understanding how interventions work at a population level [8]. We now use this approach to assess changes in population based inpatient payment data before and during an integrated care intervention, viewing the level and distribution of inpatient payments in the population as the unit of interest.

## Methods

East Cambridgeshire and Fenland (ECF: 2009 population 160,000, diabetes population 7,790) is largely rural, with a small number of socioeconomically deprived communities. There is no major hospital, falling within 4 major hospital catchment areas. Some diabetes outcomes have been historically poor [9]. A separate, local, diabetes specialist nurse (DSN) led community service was introduced in 2003 [10]. From April 2009, this

1  
2  
3 was replaced with a new Diabetes Integrated Care Initiative (DICI) using additional  
4  
5 finance (£250,000 pa), in an attempt to address continuing health disparities [11]. The  
6  
7 components of the DICI has been described in the previous publications [12]. The health  
8  
9 district includes two other areas, Huntingdonshire and Greater Cambridge, which did not  
10  
11 receive the full intermediate team and are able to serve as 'control' areas. .

12  
13  
14 De-identified electronic Secondary Uses Service (SUS) data for across Cambridgeshire  
15  
16 were obtained for recorded inpatient tariff between April 2007 (ie 2 years before the DICI  
17  
18 contract commenced) and March 2012. Practice, patient age, elective/non elective status,  
19  
20 ICD10 and Health Related Group (HRG) coding were included in the dataset. Diabetes  
21  
22 was considered present if E10-E14 was in any ICD10 field and, as the primary cause of  
23  
24 admission if coded in the first field [13, 14]. Inpatient payments recorded in 2008-2009  
25  
26 were used as baseline, to compare with that recorded in 2011-2012 as the end of the  
27  
28 intervention period. Using the Sarkadi et. al. method, the mean and standard deviation  
29  
30 for normal distributions before and after the intervention can be estimated. The "health  
31  
32 gain" is defined as the area between the two distribution curves on the right side, where  
33  
34 the distribution density after intervention is lower (the shaded area in supplemental **Error!**  
35  
36 **Reference source not found.** left). In our study, the 'health gain' represents the  
37  
38 proportion of patients with reduced inpatient payments between the baseline and  
39  
40 intervention period. However when using real data to estimate parameters for two  
41  
42 normal distributions, it is unlikely that the two curves have the same standard deviation.  
43  
44 In our case, the two curves will have crossover points. To overcome this, we have  
45  
46 modified the Sarkadi's method as described in supplemental technical appendix 1.

47  
48  
49 Bootstrapping is used to obtain a p value for the probability of health gain larger than  
50  
51 zero. We randomly sampled data points with replacements from the original data  
52  
53 separately for the baseline and follow-up, so that we obtain bootstrapped data with the  
54  
55  
56  
57  
58  
59  
60

1  
2  
3 same numbers of data points. These are used to obtain an estimation of the health gain  
4  
5 after perturbation. This process is repeated 1000 times. The probability of observing  
6  
7 estimations less than or equal to zero is calculated, and used as the approximation of the  
8  
9 p value for testing whether health gain is significantly larger than zero.  
10

11  
12 No personal identifiers were released to researchers, and all subsequent analyses were  
13  
14 conducted on anonymised datasets. The work had approval from the Cambridgeshire  
15  
16 research ethics committee as part of a wider service evaluation and, as such, was deemed  
17  
18 not to require personal informed consent.  
19

20  
21 All analyses were conducted in R [Version 3.1]. Ethics approval was received from the  
22  
23 National Research Ethics Service Committee- East of England.  
24  
25  
26  
27  
28  
29  
30  
31

## 32 Results

33  
34 The inpatient payments during the baseline period and the intervention period are shown  
35  
36 in Table 1 by area and age group. In each area and age group, a lower individual median  
37  
38 inpatient payment was more likely to be found in the intervention period.  
39

40  
41 Figure-2 shows the distribution of the inpatient payments in people with type 2 diabetes  
42  
43 in the baseline and intervention periods. This illustrates the effect of the integrated care  
44  
45 intervention, as the left-moving curve in the intervention period indicates the potential  
46  
47 inpatient payment saving at a population level. The magnitude of the intervention at the  
48  
49 population level is presented in Table-2. In the intervention area, East Cambridge and  
50  
51 Fenland, 2.74% (95 Confidence Interval (CI) 1.29 to 5.81%) of patients aged more than 70  
52  
53 years had a reduced inpatient payment, compared with the population in the baseline  
54  
55 period. In one of the control areas, Greater Cambridge, 'health gain' was also observed in  
56  
57  
58  
59  
60



1  
2  
3 3.20 (1.77 to 7.20)% of patients aged less than 70 years and 4.14 (2.27 to 7.86)% patients  
4  
5 aged more than 70 years, respectively. Significant 'health gain' was not identified within  
6  
7 the population in Huntingdonshire over the study period. The health gain distributions  
8  
9 are presented in supplemental Figure-2 to illustrate the health gains at a population level.  
10

## 11 **Discussion**

12  
13  
14  
15 We have used a novel way, calculating the total health gain (proportion of people with  
16  
17 reduced inpatient payments) assuming a Gaussian distribution, to assess the results of  
18  
19 integrated care in the diabetic population of areas in Cambridgeshire through a  
20  
21 population lens. The study revealed a possible limited effect of the new integrated care  
22  
23 approach on inpatient payments, as 2.7% of patients aged more than 70 years had  
24  
25 reduced inpatient payments in the intervention area, East Cambridge and Fenland.  
26  
27 However, reductions were also seen in one of the control areas, Greater Cambridge,  
28  
29 where inpatient payments were not only reduced in those age over 70 years (4.1%), but  
30  
31 also among those aged less than 70 years (3.2%). However, the 95% confidence intervals  
32  
33 overlapped across the 3 areas, so we have not shown any differences between the areas.  
34  
35  
36  
37  
38  
39

40  
41 Significant improvements in diabetes care can occur with multifaceted interventions [15]  
42  
43 including disease management in the US [16] and integrated care in Germany [17] and  
44  
45 these can be associated with reductions in hospital costs [18]. The integrated care  
46  
47 intervention was successfully implemented across the area, with positive patient  
48  
49 experience, improved practice nurse clinical confidence, and early reports of clinical  
50  
51 benefit [11, 12, 19]. It is therefore surprising that although some (small) positive benefit  
52  
53 was observed in the intervention area, the return on the investment of GBP250,000 was  
54  
55 not greater and possibly less than in one of the control areas. Elsewhere, diabetes  
56  
57  
58  
59  
60

1  
2  
3 integrated care interventions have generally been more effective within single providers  
4  
5 or in contexts where multiple primary care organisations work with a single specialist  
6  
7 provider under an integrated insurance scheme [5]. The integrated care intervention  
8  
9 carried out in ECF followed a nurse led service with one of the goals reducing referrals (ie  
10  
11 payments) to hospital outpatients. This philosophy, rather than progressing to truly  
12  
13 integrated services carried through the intervention period. It was perhaps to be  
14  
15 expected that attempts at creating greater integration in information management,  
16  
17 clinical governance, budget and overall management were agreed but not implemented,  
18  
19 actions more achievable within a single organization. There was an attempt to create a  
20  
21 single equal partner network model [20] nearing the end of the intervention period, but  
22  
23 this as not funded by the local commissioners.  
24  
25

26  
27 The failure to implement integrated information management, almost certainly  
28  
29 contributed to communication and integration difficulties. Most integrated care  
30  
31 initiatives attempt to include data sharing [21] and this was not possible within the local  
32  
33 information governance arrangements. This was noticed by the patients and was a  
34  
35 source of frustration. Interestingly, integration was perceived as happening when there  
36  
37 was one person 'fronting up' for all those involved. Case management has been proposed  
38  
39 as one approach to integration, and requires the case manager to corral and coordinate  
40  
41 the services for a given individual [16].  
42  
43  
44

45  
46 Whether our findings are due to a unique set of circumstances, or expected as part of a 3  
47  
48 compartment model (primary care, intermediate care, and secondary care) is unclear, but  
49  
50 there are indications that the circumstances are not special. There are calls for more  
51  
52 integration and less fragmentation in health care [21], yet the evidence on what works in  
53  
54 England is limited [22, 23]. The latest changes in commissioning in the English NHS, with  
55  
56 emphasis on the need to consider 'Any qualified Provider' in service delivery, and  
57  
58  
59  
60

1  
2  
3 associated market procurement approaches, could well impair the quality of diabetes  
4 care while increasing overall cost, if the experience here is reproduced elsewhere.  
5  
6

7  
8 Similarly, as a 'natural experiment', it was not possible to measure the impact of  
9  
10 integrated care on inpatient payments at an individual level. Instead, we estimated the  
11  
12 proportion of the population showing 'health gain' (reduced inpatient payments) from  
13  
14 the integrated care intervention by using the distribution curve of inpatient payment.  
15  
16 Although the method was within the conceptual framework proposed by Sakardi, some  
17  
18 modifications to the methodology were made to overcome methodological drawbacks,  
19  
20 for example requiring the same standard deviation for two Gaussian curves: something  
21  
22 unlikely to occur in real scenarios. We believe this revised method would be more  
23  
24 applicable to evaluate the 'health gain' for interventions at a population level.  
25  
26

27  
28 There are limitations to our study. This was not a randomised trials, so any changes could  
29  
30 be due to secular trends, although we do compare with the two other areas in  
31  
32 Cambridgeshire. The data depended on the completeness of the coding of diabetes, and  
33  
34 there being no systematic change in coding over this time period. We found that at least  
35  
36 one provider had high diabetes ascertainment [24].  
37  
38

39  
40 In conclusion, we have applied a modified novel strategy to measure 'health gain'  
41  
42 associated with an integrated care intervention at a population level. We found that  
43  
44 there were no differences in inpatient payments. Our findings suggest that irrespective of  
45  
46 the ideal principles behind integration, linking multiple health providers to deliver  
47  
48 population based diabetes care is complex and improvements in health outcomes remain  
49  
50 difficult to achieve.  
51  
52

## 53 54 55 56 **References** 57 58 59 60

1. Kar P. The 'super six' for the acute trust; all else under primary care? *Practical diabetes* 2011;28: 308-309
2. Nagi D, Wilson J. Integrated diabetes care: the Wakefield diabetes service redesign. *Practical diabetes* 2011;28: 310-311
3. Rea RD, Gregory S, Browne M, Iqbal M, Holloway S, Munir M, Rose H, Gray T, Prescott D, Jarvis S, DiStefano G, Tan GD. Integrated diabetes care in Derby: new NHS organisations for new NHS challenges. *Practical diabetes* 2011;28: 312-313
4. Arts EEA, Landewe-Cleuren SANT, Schaper NC, Vrijhoef HJM. The cost-effectiveness of substituting physicians with diabetes nurse specialists: a randomized controlled trial with 2-year follow-up. *Journal of Advanced Nursing* 2012; 68: 1224-1234
5. David Simmons, Dahai Yu, Christopher Bunn, Simon Cohn, Helmut Wenzel, Toby Prevost. Hospitalisation among patients with diabetes associated with a Diabetes Integrated Care Initiative: a mixed methods case study. *Future Hosp J.* 2015; 2(2): 92-98.
6. Wenzel H, Simmons D. Chapter-1: An introduction to integrated care and diabetes integrated care. *Integrated Diabetes Care: A Multidisciplinary Approach.* Springer (2016).
7. Wilson A, O'Hare JP, Hardy A, Raymond N, Szczepura A, Crossman R, Baines D, Khunti K, Kumar S, Saravanan P; ICCD trial group. Evaluation of the clinical and cost effectiveness of intermediate care clinics for diabetes (ICCD): a multicentre cluster randomised controlled trial. *PLoS One.* 2014;9(4):e93964.
8. Sarkadi A, Sampaio F, Kelly MP, Feldman I. A novel approach used outcome distribution curves to estimate the population-level impact of a public health intervention. *J Clin Epidemiol* 2014; 67: 785-92
9. Simmons D, Yu D, Wenzel H. Changes in hospital admissions and inpatient tariff associated with a Diabetes Integrated Care Initiative: preliminary findings. *J Diabetes* 2014; 6: 81-9
10. Hollern H, Lunn J. Development of a primary care specialist diabetes nursing service. *J Diabetes Nursing* 2004; 8:344-348
11. Simmons D, Yu D, Wenzel H. Changes in hospital admissions and inpatient tariff associated with a Diabetes Integrated Care Initiative: preliminary findings. *J Diabetes* 2014; 6: 81-9
12. Harwood E, Bunn C, Caton C, Simmons D. Addressing barriers to diabetes care and self-care in general practice: A new framework for practice nurses. *J Diab Nursing* 2013; 17: 186-91
13. Park SK, Wang W. Ambient Air Pollution and Type 2 Diabetes: A Systematic Review of Epidemiologic Research. *Curr Environ Health Rep.* 2014;1(3):275-286.
14. Wild SH, McKnight JA, McConnachie A, Lindsay RS; Glasgow and Lothian Diabetes Register Data Group. Socioeconomic status and diabetes-related hospital admissions: a cross-sectional study of people with diagnosed diabetes. *J Epidemiol Community Health.* 2010;64(11):1022-4
15. Renders CM, Valk GD, Griffin SJ, Wagner EH, Eijk Van JT. Interventions to Improve the Management of Diabetes in Primary Care, Outpatient, and Community Settings: A systematic review. *Diabetes Care* 2001;24:1821-1833
16. Norris SL, Nichols PJ, Caspersen CJ, Glasgow, RE, Engelgau MM, Jack Jr L, Isham G, Snyder SR, Carande-Kulis VG, Garfield S, Briss P, McCulloch D. The Effectiveness of Disease and Case Management for People with Diabetes: A Systematic Review. *Am J Prev Med* 2002; 22: 15-38
17. Rothe U, Muller G, Schwartz PEH, Seifert M, Kunath H, Koch R, Bergmann S, Julius U, Bornstein SR, Hanefeld M, Schulze J. Evaluation of a Diabetes Management System Based on Practice Guidelines, Integrated Care, and Continuous Quality Management in a Federal State of Germany: A population-based approach to health care research. *Diabetes Care* 2002; 25:684-689
18. Sidorov J, Shull R. Tomcavage J, Girolami S, Lawton N, Harris R. Does Diabetes Disease Management Save Money and Improve Outcomes? *Diabetes Care* 2002; 25:684-68
19. Hollern H, Simmons D. Cost saving and improved glycaemic control in an integrated diabetes service. *Primary Care Diabetes* 2011;13:176-181
20. Simmons D, Wenzel H, Zgibor JC. Chapter-15: Diabetes integrated care: are we there yet? *Integrated Diabetes Care: A Multidisciplinary Approach.* Springer (2016).
21. Ham C, Walsh N. Making integrated care happen at scale and pace. Kings Fund, London 2013.

22. Ham C, Curry N. Integrated care: What is it? Does it work? What does it mean for the NHS? Kings fund, London 2011
23. RAND Europe, Ernst & Young LLP. National Evaluation of the Department of Health's Integrated Care Pilots: final report:full version. RAND Europe, Ernst & Young LLP London 2012
24. Simmons D, Wenzel H. Diabetes inpatients: a case of lose, lose, lose. Is it time to use a 'diabetes-attributable hospitalization cost' to assess the impact of diabetes? Diabet Med. 2011;28(9):1123-30.

### **Acknowledgements**

The views expressed are those of the authors and not necessarily those of the NHS, the NIHR or the Department of Health.

### **Contributors**

D.Y. analysed the data and drafted the manuscript; W.Y. revised the statistical methods and revised the manuscript; Y.C. validated the method and re-analysed the data independently; Z.Z. designed the analysis framework and revised manuscript; D.S. designed the study, revised the analysis framework, revised the manuscript and interpreted the findings.

### **Funding**

This paper presents independent research funded by the National Institute for Health Research (NIHR) under its Research for Patient Benefit (RfPB) Programme (Grant Reference Number PB-PG-0808-17303).

### **Competing interests**

None declared.

### **Ethics approval**

No personal identifiers were released to researchers, and all subsequent analyses were conducted on anonymised datasets. The work had approval from the Cambridgeshire research ethics committee as part of a wider service evaluation and, as such, was deemed not to require personal informed consent.

### **Provenance and peer review**

Not commissioned; externally peer reviewed.

### **Data sharing statement**

No additional data are available.

1  
2  
3 **Figure 1. Using the normal (Gaussian) curve to demonstrate the distribution of inpatient cost in**  
4 **people with type 2 diabetes and possible effects of an integrated care on the curve.**  
5  
6

7 *The differences between the respective areas under the curve are shaded. Health gains for*  
8 *participants with lower inpatient cost.*

9 *Left top: East Cambridge and Fenland, <70 years; right top: East Cambridge and Fenland, ≥70 years;*

10 *Left middle: Great Cambridge, <70 years; right middle: Great Cambridge, ≥70 years;*

11 *Left bottom: Huntingdonshire, <70 years; right bottom: Huntingdonshire, ≥70 years.*  
12  
13  
14  
15  
16  
17  
18  
19  
20  
21  
22  
23  
24  
25  
26  
27  
28  
29  
30  
31  
32  
33  
34  
35  
36  
37  
38  
39  
40  
41  
42  
43  
44  
45  
46  
47  
48  
49  
50  
51  
52  
53  
54  
55  
56  
57  
58  
59  
60

For peer review only

Table 1. Distribution of age and inpatient cost among people with type 2 diabetes by region and year

|           |           | East Cambridge and Fenland |                 | Huntingdonshire |                 | Great Cambridge |                  |
|-----------|-----------|----------------------------|-----------------|-----------------|-----------------|-----------------|------------------|
|           |           | <70 years                  | ≥70 years       | <70 years       | ≥70 years       | <70 years       | ≥70 years        |
| 2008-2009 | Age, year | 60 (51, 65)                | 78 (74, 82)     | 61 (52, 65)     | 77 (73, 83)     | 58 (48, 64)     | 78 (74, 82)      |
|           | Cost, £   | 819 (506, 1860)            | 911 (531, 2473) | 808 (504, 1707) | 808 (531, 2251) | 933 (597, 1997) | 1151 (611, 2638) |
| 2011-2012 | Age, year | 60 (51, 65)                | 78 (74, 83)     | 60 (48, 66)     | 77 (73, 83)     | 59 (50, 66)     | 79 (75, 84)      |
|           | Cost, £   | 683 (468, 1635)            | 823 (498, 2475) | 677 (502, 1666) | 808 (469, 2220) | 781 (505, 1688) | 1031 (611, 2508) |

The median (inter-quartile range (IQR)) was presented both for age and cost.

Table 2. The estimated absolute 'health cost gain (impact)' after the intervention by age and region

|                            |            | Impact   | 95% confidence interval | P value (bootstrapping) |
|----------------------------|------------|----------|-------------------------|-------------------------|
| East Cambridge and Fenland | < 70 years | 0.015802 | (-0.01905, 0.04878)     | 0.051948                |
|                            | ≥70 years  | 0.027425 | (0.012896, 0.058123)    | 0.014985                |
| Huntingdonshire            | < 70 years | 0.018321 | (-0.02444, 0.058739)    | 0.220779                |
|                            | ≥70 years  | -0.02064 | (-0.05535, 0.037903)    | 0.737263                |
| Greater Cambridge          | < 70 years | 0.03201  | (0.01774, 0.072033)     | 0.004995                |
|                            | ≥70 years  | 0.041415 | (0.022678, 0.078574)    | 0.000999                |

The health cost gain (impact) was defined as percentage of people with type 2 diabetes and hospital admission having reduced health cost after the integrated care at population level.

1  
2  
3  
4  
5  
6  
7  
8  
9  
10  
11  
12  
13  
14  
15  
16  
17  
18  
19  
20  
21  
22  
23  
24  
25  
26  
27  
28  
29  
30  
31  
32  
33  
34  
35  
36  
37  
38  
39  
40  
41  
42  
43  
44  
45  
46  
47  
48  
49  
50  
51  
52  
53  
54  
55  
56  
57  
58  
59  
60

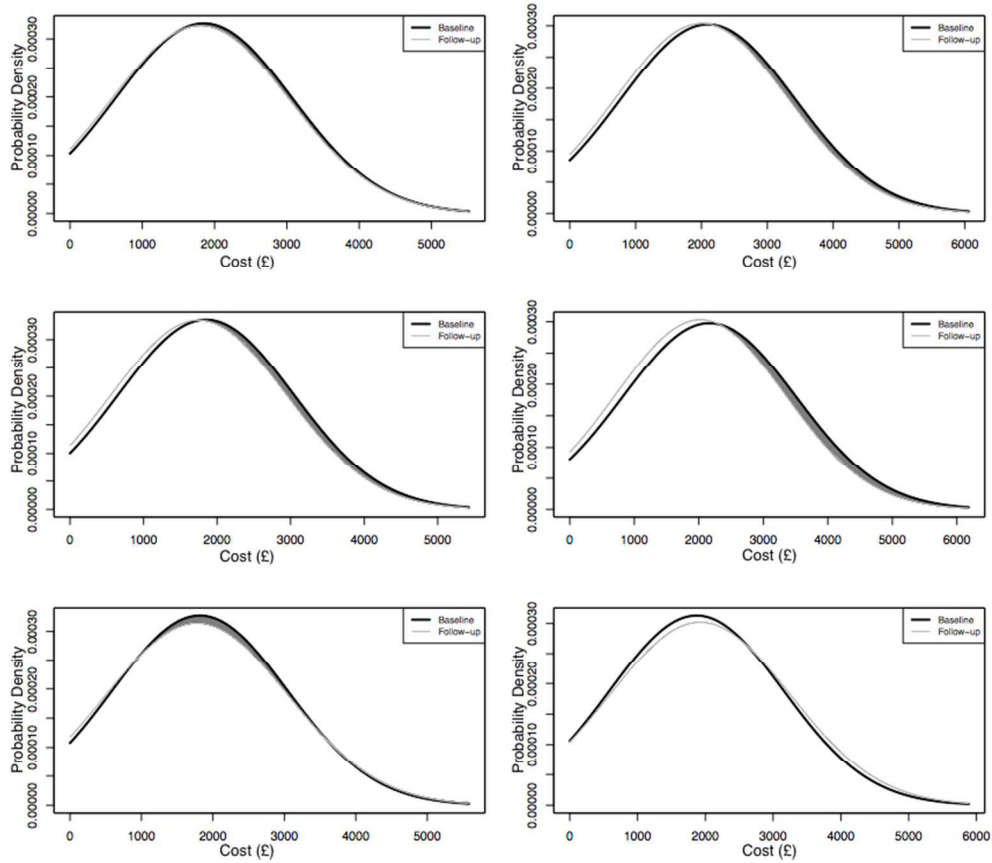

228x203mm (96 x 96 DPI)

only



**Title:** Population-level impact of diabetes integrated care on payments for inpatient care among people with type 2 diabetes in Cambridgeshire

**Authors:** Dahai Yu <sup>1,2</sup>, Wei Yang <sup>1,3</sup>, Yamei Cai <sup>1</sup>, Zhanzheng Zhao <sup>1\*</sup>, David Simmons <sup>4\*</sup>

1. Department of Nephrology, the First Affiliated Hospital, Zhengzhou University, Zhengzhou 450052, China

2. Arthritis Research UK Primary Care Centre, Research Institute for Primary Care & Health Sciences, Keele University, Keele ST5 5BG, UK

3. School of Medicine, Washington University in St Louis, 660 S Euclid Ave, St. Louis, MO 63110, United States

4. Western Sydney University, Campbelltown, Sydney NSW 2751, Australia

**\*Correspondence 1 (China):**

Professor Zhanzheng Zhao, Department of Nephrology, The First Affiliated Hospital

Zhengzhou University, Zhengzhou 450052, CHINA

Email: [zhanzhengzhao@zzu.edu.cn](mailto:zhanzhengzhao@zzu.edu.cn)

TEL:+86 139 3852 5666

FAX:+86 371 6698 8753

**\*Correspondence 2 (Australia):**

Professor David Simmons, Macarthur Clinical School, School of Medicine, Western Sydney University, Locked Bag 1797, Campbelltown NSW 2751, AUSTRALIA

Email: [dsworkster@gmail.com](mailto:dsworkster@gmail.com)

TEL: (61+2) 4620 3899

FAX: (61+2) 4620 3890

## Online supplemental 1: Technical Appendix

### Estimating intervention impact, and confidence interval estimation

Sarkadi et. al. described a method to assess the population-level impact of interventions using normal distributions to approximate the actual data. After estimating the mean and standard deviation for the normal distributions before and after intervention, the “health gain” is defined as the area between the two distribution curves on the right side, where the distribution density after intervention is lower (the shaded area in supplemental Figure 1 below).

### Supplemental Figure 1. Normal distribution curves.

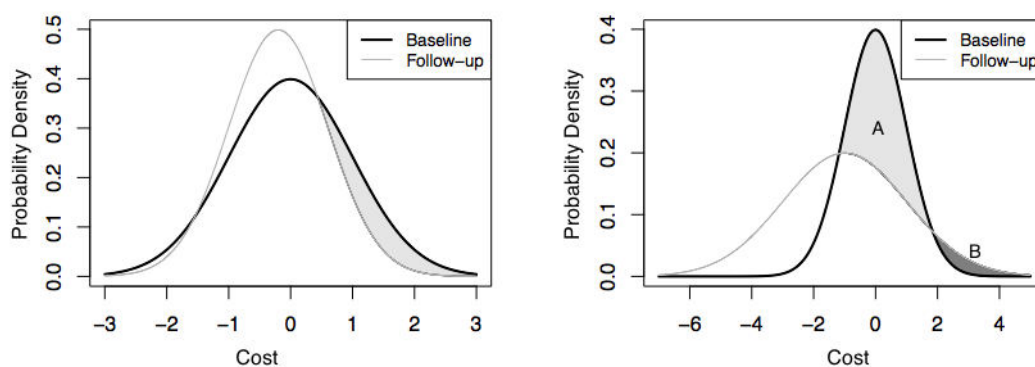

To estimate the confidence interval, Sarkadi et. al. proposed to start from estimating the confidence intervals of mean and standard deviation for the two normal distributions. The point estimation of the mean for the baseline is  $\mu_1$ , and the lower and higher bounds of the confidence interval at a certain level (for example, 95% confidence interval) are  $\mu_{1min}$  and  $\mu_{1max}$ , respectively; the estimation of standard deviation at baseline is  $\sigma_1$ , and the two bounds of confidence interval are  $\sigma_{1min}$  and  $\sigma_{1max}$ . Similarly, for the follow-up data, point estimations are  $\mu_2$  and  $\sigma_2$ , and the confidence bounds for them as  $\mu_{2min}$ ,  $\mu_{2max}$ , and  $\sigma_{2min}$ ,  $\sigma_{2max}$ . Denote the health gain as a function of the parameters for the two normal distributions as  $F(\mu_1, \sigma_1, \mu_2, \sigma_2)$ . Sarkadi et. al. get the lower and higher bounds of confidence interval for the health gain as  $\text{MIN}(F(\mu_{1min}, \sigma_{1max}, \mu_2, \sigma_2), F(\mu_1, \sigma_1, \mu_{2min}, \sigma_{2max}))$ , and  $\text{MAX}(F(\mu_{1max}, \sigma_{1min}, \mu_2, \sigma_2), F(\mu_1, \sigma_1, \mu_{2max}, \sigma_{2min}))$ .

### Modification of the impact estimation

There are a few situations where the original estimation algorithm is ambiguous.

When using real data to estimate parameters for the two normal distributions, it is unlikely that the two curves have the same standard deviation. In this case, the two curves will have to crossover points.

- (1) If the two distributions are shown as in the left graph in Supplemental Figure 1, where the density of the follow-up is always lower compared to the baseline when observed data is larger than the larger of the two crossover points, it is easy to get the health gain estimation as the shaded area.

- 1  
2  
3  
4  
5  
6  
7  
8  
9  
10  
11  
12  
13  
14  
15  
16  
17  
18  
19  
20  
21  
22  
23  
24  
25  
26  
27  
28  
29  
30  
31  
32  
33  
34  
35  
36  
37  
38  
39  
40  
41  
42  
43  
44  
45  
46  
47  
48  
49  
50  
51  
52  
53  
54  
55  
56  
57  
58  
59  
60
- (2) However, if the situation is as in the right graph in Supplemental Figure 1, where the density of follow-up is only lower compared to the baseline in the region between the two crossover points, the original method has failed to make a clear definition of the health gain. Here, we will define it as the difference of the two shaded areas A and B.
- (3) The original method only discussed the case where the estimated mean after intervention is no larger than that of the baseline. We need to define health gain estimation even though this is not true, so that we can have negative estimations when calculating confidence intervals. If the estimated mean after intervention increases, we switch the places of the two curves to estimate a positive health gain as previously, and then put a negative sign to this value and take it as the negative health gain.

For peer review only

**Online supplemental 2: Figure 2. The health cost gain (impact) distribution**

The health cost gain (impact) was defined as percentage of people with type 2 diabetes and hospital admission having reduced health cost after the 3 year integrated care at population level.

Left top: East Cambridge and Fenland, <70 years; right top: East Cambridge and Fenland, ≥70 years;  
 Left middle: Great Cambridge, <70 years; right middle: Great Cambridge, ≥70 years;  
 Left bottom: Huntingdonshire, <70 years; right bottom: Huntingdonshire, ≥70 years.

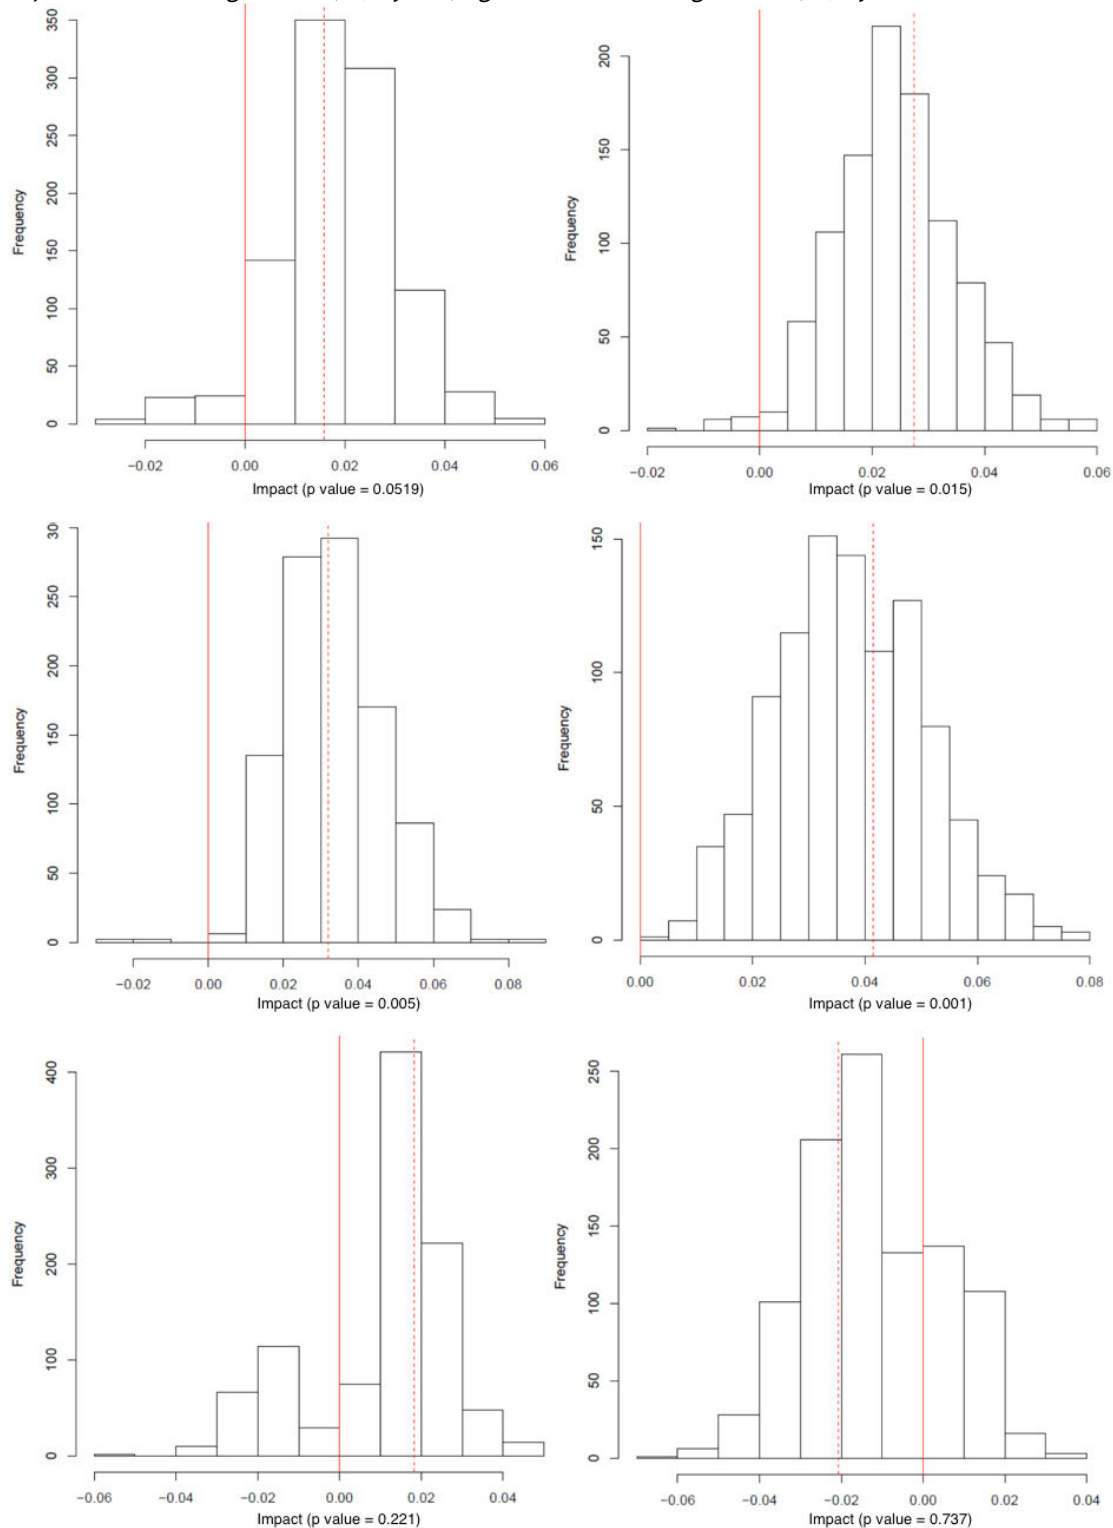

## STROBE Statement—checklist of items that should be included in reports of observational studies

|                              | Item No | Recommendation                                                                                                                                                                                                                                                                                                                                         |
|------------------------------|---------|--------------------------------------------------------------------------------------------------------------------------------------------------------------------------------------------------------------------------------------------------------------------------------------------------------------------------------------------------------|
| <b>Title and abstract</b>    | 1       | (a) Indicate the study's design with a commonly used term in the title or the abstract<br>Response: Yes, it has been indicated on page 2.<br>(b) Provide in the abstract an informative and balanced summary of what was done and what was found<br>Response: Yes, it has been indicated on page 2.                                                    |
| <b>Introduction</b>          |         |                                                                                                                                                                                                                                                                                                                                                        |
| Background/rationale         | 2       | Explain the scientific background and rationale for the investigation being reported<br>Response: Yes, it has been described in the 'Introduction' section on page 4.                                                                                                                                                                                  |
| Objectives                   | 3       | State specific objectives, including any prespecified hypotheses<br>Response: Yes, it was indicated in the last paragraph of the Introduction section on page 4.                                                                                                                                                                                       |
| <b>Methods</b>               |         |                                                                                                                                                                                                                                                                                                                                                        |
| Study design                 | 4       | Present key elements of study design early in the paper<br>Response: It was described in the method section on page 4.                                                                                                                                                                                                                                 |
| Setting                      | 5       | Describe the setting, locations, and relevant dates, including periods of recruitment, exposure, follow-up, and data collection<br>Response: It was described in the method section on page 4-5.                                                                                                                                                       |
| Participants                 | 6       | (a) <i>Cohort study</i> —Give the eligibility criteria, and the sources and methods of selection of participants. Describe methods of follow-up<br>Response: It was described in the method section on page 5.<br>(b) <i>Cohort study</i> —For matched studies, give matching criteria and number of exposed and unexposed<br>Response: Not applicable |
| Variables                    | 7       | Clearly define all outcomes, exposures, predictors, potential confounders, and effect modifiers. Give diagnostic criteria, if applicable<br>Response: It was described in the method section on page 5.                                                                                                                                                |
| Data sources/<br>measurement | 8*      | For each variable of interest, give sources of data and details of methods of assessment (measurement). Describe comparability of assessment methods if there is more than one group<br>Response: It was described in the method section on page 5.                                                                                                    |
| Bias                         | 9       | Describe any efforts to address potential sources of bias<br>Response: It was described in the method section on page 5.                                                                                                                                                                                                                               |
| Study size                   | 10      | Explain how the study size was arrived at<br>Response: There was no sample in this study. Any inpatient income of each patient in the intervention area and control was recorded by CCG as described on page 5.                                                                                                                                        |
| Quantitative variables       | 11      | Explain how quantitative variables were handled in the analyses. If applicable, describe which groupings were chosen and why<br>Response: It was described in the method section on page 5.                                                                                                                                                            |
| Statistical methods          | 12      | (a) Describe all statistical methods, including those used to control for confounding<br>Response: It was described both in the method section on page 5 and in the online supplemental.<br>(b) Describe any methods used to examine subgroups and interactions<br>Response: It was described in the method section on page 5 and in the online        |

1  
2 supplemental.

---

3 (c) Explain how missing data were addressed

4 Response: Not applicable. Any inpatient income of each patient in the intervention  
5 area and control was recorded by CCG as described on page 5.

---

6  
7 (d) Cohort study—If applicable, explain how loss to follow-up was addressed

8 Response: It was described in the method section as defined as the financial year of  
9 the CCG audit team on page 5.

---

10 (e) Describe any sensitivity analyses

11 Response: the analysis were repeated in the age-stratification and verified by  
12 bootstrapping on page 5 and 6.

13  
14  
15 Continued on next page

16  
17  
18  
19  
20  
21  
22  
23  
24  
25  
26  
27  
28  
29  
30  
31  
32  
33  
34  
35  
36  
37  
38  
39  
40  
41  
42  
43  
44  
45  
46  
47  
48  
49  
50  
51  
52  
53  
54  
55  
56  
57  
58  
59  
60

For peer review only

**Results**

|                   |     |                                                                                                                                                                                                                                                                                                                                                                                                                                                                                                                                                                                                                                                                                                                                                                                                                                    |
|-------------------|-----|------------------------------------------------------------------------------------------------------------------------------------------------------------------------------------------------------------------------------------------------------------------------------------------------------------------------------------------------------------------------------------------------------------------------------------------------------------------------------------------------------------------------------------------------------------------------------------------------------------------------------------------------------------------------------------------------------------------------------------------------------------------------------------------------------------------------------------|
| Participants      | 13* | <p>(a) Report numbers of individuals at each stage of study—eg numbers potentially eligible, examined for eligibility, confirmed eligible, included in the study, completing follow-up, and analysed</p> <p>Response: As the evaluation at population level, there was no information at individual level was used in this study as described on page 6.</p> <p>(b) Give reasons for non-participation at each stage</p> <p>Response: Not applicable.</p> <p>(c) Consider use of a flow diagram</p> <p>Response: Not applicable.</p>                                                                                                                                                                                                                                                                                               |
| Descriptive data  | 14* | <p>(a) Give characteristics of study participants (eg demographic, clinical, social) and information on exposures and potential confounders</p> <p>Response: As the evaluation on the population level, the individual information was not utilised in this study as described on page 6. But the outcome on population level by regions and time periods was described in table-1 on page 13.</p> <p>(b) Indicate number of participants with missing data for each variable of interest</p> <p>Response: Not applicable.</p> <p>(c) <i>Cohort study</i>—Summarise follow-up time (eg, average and total amount)</p> <p>Response: It was described in the method section as defined as the financial year of the CCG audit team on page 5 and same follow up time defined by the financial year was equal across populations.</p> |
| Outcome data      | 15* | <p><i>Cohort study</i>—Report numbers of outcome events or summary measures over time</p> <p>Response: It was described in table-1 on page 13.</p>                                                                                                                                                                                                                                                                                                                                                                                                                                                                                                                                                                                                                                                                                 |
| Main results      | 16  | <p>(a) Give unadjusted estimates and, if applicable, confounder-adjusted estimates and their precision (eg, 95% confidence interval). Make clear which confounders were adjusted for and why they were included</p> <p>Response: The health gain was described in table-2 with confidence interval tested by bootstrapping on page 13.</p> <p>(b) Report category boundaries when continuous variables were categorized</p> <p>Response: Not applicable.</p> <p>(c) If relevant, consider translating estimates of relative risk into absolute risk for a meaningful time period</p> <p>Response: Not applicable.</p>                                                                                                                                                                                                              |
| Other analyses    | 17  | <p>Report other analyses done—eg analyses of subgroups and interactions, and sensitivity analyses</p> <p>Response: Not applicable.</p>                                                                                                                                                                                                                                                                                                                                                                                                                                                                                                                                                                                                                                                                                             |
| <b>Discussion</b> |     |                                                                                                                                                                                                                                                                                                                                                                                                                                                                                                                                                                                                                                                                                                                                                                                                                                    |
| Key results       | 18  | <p>Summarise key results with reference to study objectives</p> <p>Response: It was described in the page-8.</p>                                                                                                                                                                                                                                                                                                                                                                                                                                                                                                                                                                                                                                                                                                                   |
| Limitations       | 19  | <p>Discuss limitations of the study, taking into account sources of potential bias or imprecision. Discuss both direction and magnitude of any potential bias</p> <p>Response: It was described in the page-9.</p>                                                                                                                                                                                                                                                                                                                                                                                                                                                                                                                                                                                                                 |
| Interpretation    | 20  | <p>Give a cautious overall interpretation of results considering objectives, limitations, multiplicity of analyses, results from similar studies, and other relevant evidence</p> <p>Response: It was described in the page-9.</p>                                                                                                                                                                                                                                                                                                                                                                                                                                                                                                                                                                                                 |

1  
2 Generalisability 21 Discuss the generalisability (external validity) of the study results

3 Response: It was described in the page-9.

---

4 **Other information**

---

5  
6 Funding 22 Give the source of funding and the role of the funders for the present study and, if applicable,  
7 for the original study on which the present article is based

8 Response: It was described in the page-11.

9 \*Give information separately for cases and controls in case-control studies and, if applicable, for exposed and  
10 unexposed groups in cohort and cross-sectional studies.  
11

12  
13 **Note:** An Explanation and Elaboration article discusses each checklist item and gives methodological background and  
14 published examples of transparent reporting. The STROBE checklist is best used in conjunction with this article (freely  
15 available on the Web sites of PLoS Medicine at <http://www.plosmedicine.org/>, Annals of Internal Medicine at  
16 <http://www.annals.org/>, and Epidemiology at <http://www.epidem.com/>). Information on the STROBE Initiative is  
17 available at [www.strobe-statement.org](http://www.strobe-statement.org).  
18  
19  
20  
21  
22  
23  
24  
25  
26  
27  
28  
29  
30  
31  
32  
33  
34  
35  
36  
37  
38  
39  
40  
41  
42  
43  
44  
45  
46  
47  
48  
49  
50  
51  
52  
53  
54  
55  
56  
57  
58  
59  
60



# BMJ Open

## Population-level impact of diabetes integrated care on commissioner payments for inpatient care among people with type 2 diabetes in Cambridgeshire

|                                 |                                                                                                                                                                                                                                                                                                                                                                                                                                                                                                                                                                                                                                        |
|---------------------------------|----------------------------------------------------------------------------------------------------------------------------------------------------------------------------------------------------------------------------------------------------------------------------------------------------------------------------------------------------------------------------------------------------------------------------------------------------------------------------------------------------------------------------------------------------------------------------------------------------------------------------------------|
| Journal:                        | <i>BMJ Open</i>                                                                                                                                                                                                                                                                                                                                                                                                                                                                                                                                                                                                                        |
| Manuscript ID                   | bmjopen-2017-015816.R1                                                                                                                                                                                                                                                                                                                                                                                                                                                                                                                                                                                                                 |
| Article Type:                   | Research                                                                                                                                                                                                                                                                                                                                                                                                                                                                                                                                                                                                                               |
| Date Submitted by the Author:   | 05-Sep-2017                                                                                                                                                                                                                                                                                                                                                                                                                                                                                                                                                                                                                            |
| Complete List of Authors:       | Yu, Dahai; the First Affiliated Hospital, Zhengzhou University, Department of Nephrology; Keele University, Arthritis Research UK Primary Care Centre, Research Institute for Primary Care & Health Sciences<br>Yang, Wei; the First Affiliated Hospital, Zhengzhou University, Department of Nephrology; Washington University in St Louis, School of Medicine<br>cai, yamei; the First Affiliated Hospital, Zhengzhou University, Department of Nephrology<br>Zhao, Zhanzheng; the First Affiliated Hospital, Zhengzhou University, Department of Nephrology<br>Simmons, David; Western Sydney University, Macarthur Clinical School |
| <b>Primary Subject Heading</b>: | Diabetes and endocrinology                                                                                                                                                                                                                                                                                                                                                                                                                                                                                                                                                                                                             |
| Secondary Subject Heading:      | Research methods                                                                                                                                                                                                                                                                                                                                                                                                                                                                                                                                                                                                                       |
| Keywords:                       | intergrated care, Diabetes, Intervention studies, Area under the curve                                                                                                                                                                                                                                                                                                                                                                                                                                                                                                                                                                 |
|                                 |                                                                                                                                                                                                                                                                                                                                                                                                                                                                                                                                                                                                                                        |

SCHOLARONE™  
Manuscripts

1  
2  
3 **Title Page**

4 **Title:** Population-level impact of diabetes integrated care on commissioner payments for  
5 inpatient care among people with type 2 diabetes in Cambridgeshire

6 **Authors:** Dahai Yu <sup>1,2</sup>, Wei Yang <sup>1,3</sup>, Yamei Cai <sup>1</sup>, Zhanzheng Zhao <sup>1\*</sup>, David Simmons  
7 <sup>4\*</sup>

8  
9  
10 1. Department of Nephrology, the First Affiliated Hospital, Zhengzhou University,  
11 Zhengzhou 450052, China

12  
13 2. Arthritis Research UK Primary Care Centre, Research Institute for Primary Care  
14 & Health Sciences, Keele University, Keele ST5 5BG, UK

15  
16 3. School of Medicine, Washington University in St Louis, 660 S Euclid Ave, St.  
17 Louis, MO 63110, United States

18  
19 4. Western Sydney University, Campbelltown, Sydney NSW 2751, Australia

20  
21  
22  
23  
24 **\*Correspondence 1 (China):**

25 Professor Zhanzheng Zhao, Department of Nephrology, The First Affiliated  
26 Hospital

27 Zhengzhou University, Zhengzhou 450052, CHINA

28 Email: [zhanzhengzhao@zzu.edu.cn](mailto:zhanzhengzhao@zzu.edu.cn)

29 TEL:+86 139 3852 5666

30 FAX:+86 371 6698 8753

31  
32  
33 **\*Correspondence 2 (Australia):**

34 Professor David Simmons, Macarthur Clinical School, School of Medicine, Western  
35 Sydney University, Locked Bag 1797, Campbelltown NSW 2751, AUSTRALIA

36 Email: [dsworkster@gmail.com](mailto:dsworkster@gmail.com)

37 TEL: (61+2) 4620 3899

38 FAX: (61+2) 4620 3890

39  
40  
41  
42  
43 Words in the main text: 2,178

44 Words in the abstract: 222

45 Tables: 3

46 Figures: 1

47 References: 26

48 Online Appendix: 1

49 Keywords: Diabetes; Integrated care; Intervention studies; Area under the curve

50  
51  
52  
53  
54  
55  
56  
57  
58  
59  
60

1  
2  
3 1 Abstract

4 2 **Objectives**

5 3 Few studies have estimated the effect of diabetes integrated care at a population level.  
6 4 We have assessed the impact of introducing a community service led diabetes integrated  
7 5 care programme on commissioner payments (tariff) for inpatient care in rural England.

8  
9  
10 6 **Methods**

11 7 The Diabetes Integrated Care Initiative (DICI) was delivered by a separate enhanced  
12 8 community diabetes service, increasing specialist nursing, dietetic, podiatry and medical  
13 9 support to primary care and patients, while linking into other diabetes specialist services.  
14 10 Commissioner data was provided by the local authority. The difference in area between  
15 11 the two overlapping distribution curves of inpatient payments at baseline and follow-up  
16 12 (at 3 years) was used to estimate the effect of integrated care on commissioner inpatient  
17 13 payments on a population level.

18  
19  
20 14 **Results**

21 15 Over the three-year period, reduced inpatient payments occurred in 2.7 (1.3 to 5.8) % of  
22 16 patients with diabetes aged more than 70 years in the Intervention area. However,  
23 17 reduced diabetes inpatient payments occurred in 3.20 (1.77 to 7.20) % of patients aged <70  
24 18 years and 4.1 (2.3 to 7.9) % of patients ≥aged more than 70 years in one of the two  
25 19 adjacent areas.

26  
27 20 **Conclusion**

28  
29 21 This enhanced community diabetes services was not associated with substantially  
30 22 reduced inpatient payments. Alternative diabetes integrated care approaches (eg with  
31 23 direct primary and secondary care collaboration rather than with a community service)  
32 24 should be tested.

33 25

34 26

35 27

36 28

37 29

38 30

39 31

40 32

41 33

42 34

43 35

44 36

45 37

46 38

47  
48  
49  
50  
51  
52  
53  
54  
55  
56  
57  
58  
59  
60

1  
2  
3 1  
4  
5 2  
6 3  
7  
8 4  
9  
10 5  
11  
12 6  
13  
14 7  
15  
16 8  
17  
18 9  
19  
20 10  
21  
22 11  
23  
24 12  
25  
26 13  
27  
28 14  
29  
30 15  
31  
32 16  
33  
34 17  
35  
36 18  
37  
38 19  
39  
40 20  
41  
42 21  
43  
44 22  
45  
46 23  
47  
48 24  
49  
50 25  
51  
52 26  
53  
54 27  
55  
56  
57  
58  
59  
60

## Strengths and limitations of this study

- This study raised a revised novel method to calculate the impact of interventions at population-level by comparing the area under the distribution curves before and after the intervention.
- The ‘health gain’ in the revised method was clearly defined with a formulated algorithm of evaluation, which broadened the utilization scenarios especially when negative values were raised.
- With application of this novel method, this study found that the integrated diabetes care was not associated with substantially reduced inpatient payments.
- The data used in this study depended upon the completeness of the coding for diabetes in the GP records. The impact of this potential ascertainment bias should have been steady as no systematic change in coding should have occurred over this time period.

## 1     **Introduction**

2     As the social and economic impact of diabetes grows, so does the variety of attempts to  
3     improve care quality and reduce health care costs among those affected [1, 2, 3, 4]. One  
4     approach, able to provide at least equivalent care to routine medical care with some  
5     types of patients, has been the introduction of nurses working within protocols, within  
6     medical services [5]. Other models known as ‘intermediate care’, including general  
7     practitioners with a special interest [6], and community diabetes nursing services [6]  
8     have been implemented, but without robust evaluation. As a proposed system,  
9     integrated care articulates all health workers and health systems around the needs of  
10    each patient and should be associated with improved outcomes and less cost [7].

11   However, the impact of a population based integrated care intervention is difficult to  
12   measure on an individual level. One randomised trial of an intermediate care service  
13   achieved minimal actual incremental benefit [8]. By their nature, randomised controlled  
14   trials are difficult to utilise when assessing the impact of a complete system change at a  
15   population level. . Sarkadi et al have proposed a method to look at population outcomes  
16   in their own right in the quest of understanding how interventions work at a population  
17   level [9]. Under the English National Health Service (NHS), public inpatient care is paid  
18   for from taxation through local commissioners. These payments do not generally cover  
19   the hospital costs of inpatients with diabetes [10], but can provide an NHS commissioner  
20   perspective that reflects both acuity and complexity, beyond eg length of stay. We have  
21   now used the Sarkadi approach to assess whether any changes in population based  
22   commissioner inpatient payment data occurred during a diabetes integrated care  
23   intervention by viewing the level and distribution of commissioner inpatient payments in  
24   the population as the unit of interest.

## 25    **Methods**

1  
2  
3 1 East Cambridgeshire and Fenland (ECF: 2009 population 160,000, diabetes population  
4  
5 2 7,790) is largely rural, with a small number of socioeconomically deprived communities  
6  
7 3 [6]. There is no local major hospital (with eg an emergency department), falling within  
8  
9 4 the catchment areas of 4 hospitals outside of the area. Some diabetes outcomes have  
10  
11 5 been historically poor [11]. A separate, local, diabetes specialist nurse (DSN) led  
12  
13 6 community service was introduced in 2003 [12]. From April 2009, this was replaced with a  
14  
15 7 new Diabetes Integrated Care Initiative (DICI) using additional finance (£250,000 pa), in  
16  
17 8 an attempt to address continuing health disparities [13]. The components of the DICI has  
18  
19 9 been described in the previous publications [14]. The health district includes two other  
20  
21 10 areas, Huntingdonshire and Greater Cambridge, which did not receive the full  
22  
23 11 intermediate team and are able to serve as ‘control’ areas, although each hospital based  
24  
25 12 service would have continued with its own internal service developments. We have  
26  
27 13 previously reported no impact on metabolic control or hospitalisation rates in spite of full  
28  
29 14 implementation of the service [6].  
30  
31  
32  
33 15 De-identified electronic Secondary Uses Service (SUS) data for across Cambridgeshire  
34  
35 16 were obtained for recorded inpatient tariff between April 2007 (ie 2 years before the DICI  
36  
37 17 contract commenced) and March 2012. Practice, patient age, elective/non elective status,  
38  
39 18 ICD10 and Health Related Group (HRG) coding were included in the dataset. Diabetes  
40  
41 19 was considered present if E10-E14 was in any ICD10 field and, as the primary cause of  
42  
43 20 admission if coded in the first field [15, 16]. Inpatient payments recorded in 2008-2009  
44  
45 21 were used as baseline, to compare with that recorded in 2011-2012 as the end of the  
46  
47 22 intervention period. Using the Sarkadi et. al. method, the mean and standard deviation  
48  
49 23 for normal distributions before and after the intervention can be estimated. The “health  
50  
51 24 gain” is defined as the area between the two distribution curves on the right side, where  
52  
53 25 the distribution density after intervention is lower (the shaded area in supplemental **Error!**  
54  
55 26 **Reference source not found.** left). In our study, ‘health gain’ represents the proportion  
56  
57  
58  
59  
60

1 of patients with reduced inpatient payments between the baseline and intervention  
2 period. The reduction in commissioner payments is seen as a 'health gain', as under the  
3 NHS, such liberation of public funds can be used elsewhere to achieve a gain in health.

4  
5 Sarkadi's method has outlined ways to calculate the impact when the two distributions  
6 have the same standard deviation (SD), or when the follow-up group has smaller mean  
7 and smaller SD at the same time. However we have noticed when using real data that the  
8 follow-up-group might have smaller mean but larger SD. To accommodate this situation,  
9 we have modified the Sarkadi's method as described in supplemental technical appendix  
10 1.

11 Bootstrapping is used to obtain a p value for the probability of health gain larger than  
12 zero. We randomly sampled data points with replacements from the original data  
13 separately for the baseline and follow-up, so that we obtain bootstrapped data with the  
14 same numbers of data points. These are used to obtain an estimation of the health gain  
15 after perturbation. This process is repeated 1000 times. The probability of observing  
16 estimations less than or equal to zero is calculated, and used as the approximation of the  
17 p value for testing whether health gain is significantly larger than zero.

18 No personal identifiers were released to researchers, and all subsequent analyses were  
19 conducted on anonymised datasets. Age data were provided allowing analyses to be  
20 undertaken above and below the median age (70 years) to assess any related variation.  
21 The work had approval from the Cambridgeshire research ethics committee as part of a  
22 wider service evaluation and, as such, was deemed not to require personal informed  
23 consent.

1  
2  
3 1 All analyses were conducted in R [Version 3.1]. Ethics approval was received from the  
4  
5 2 National Research Ethics Service Committee- East of England.  
6  
7  
8  
9  
10  
11  
12

### 13 **Results**

14  
15 6 The sample size of inpatient payment records during the baseline and the intervention  
16  
17 7 period in each region is presented in Table 1. The inpatient payments during the baseline  
18  
19 8 period and the intervention period are shown in Table 2 by area and age group. In each  
20  
21 9 area and age group, a lower individual median inpatient payment was more likely to be  
22  
23 10 found in the intervention period.  
24  
25

26  
27 11 Figure-1 shows the distribution of the inpatient payments in people with type 2 diabetes  
28  
29 12 in the baseline and intervention periods. This illustrates the effect of the integrated care  
30  
31 13 intervention, as the left-moving curve in the intervention period indicates the potential  
32  
33 14 inpatient payment saving at a population level. The magnitude of the intervention at the  
34  
35 15 population level is presented in Table-3. In the intervention area, East Cambridge and  
36  
37 16 Fenland, 2.74% (95 Confidence Interval (CI) 1.29 to 5.81%) of patients aged more than 70  
38  
39 17 years had a reduced inpatient payment, compared with the population in the baseline  
40  
41 18 period. In one of the control areas, Greater Cambridge, 'health gain' was also observed in  
42  
43 19 3.20 (1.77 to 7.20)% of patients aged less than 70 years and 4.14 (2.27 to 7.86)% patients  
44  
45 20 aged more than 70 years, respectively. Significant 'health gain' was not identified within  
46  
47 21 the population in Huntingdonshire over the study period. The health gain distributions  
48  
49 22 are presented in supplemental Figure-2 to illustrate the health gains at a population level.  
50

51  
52 23 The gamma-distribution and log-normal distribution was attempted to be applied in the  
53  
54 24 study which did not significantly make improvement in fitting the data distributions. The  
55  
56  
57  
58  
59  
60



1  
2  
3 1 G-computation [17] was also applied in the data and restricted by the data access, no  
4  
5 2 significant changes was observed.  
6  
7  
8  
9

#### 10 4 **Discussion**

11  
12 5  
13  
14 6 We have used a novel way, calculating the total health gain (proportion of people with  
15  
16 7 reduced inpatient payments) assuming a Gaussian distribution, to assess the results of  
17  
18 8 integrated care in the diabetic population of areas in Cambridgeshire through a  
19  
20 9 population lens. The study revealed a possible limited effect of the new integrated care  
21  
22 10 approach on inpatient payments, as 2.7% of patients aged more than 70 years had  
23  
24 11 reduced inpatient payments in the intervention area, East Cambridge and Fenland.  
25  
26 12 However, reductions were also seen in one of the control areas, Greater Cambridge,  
27  
28 13 where inpatient payments were not only reduced in those age over 70 years (4.1%), but  
29  
30 14 also among those aged less than 70 years (3.2%). However, the 95% confidence intervals  
31  
32 15 overlapped across the 3 areas, so we have not shown any differences between the areas.  
33  
34  
35  
36  
37

38 17 Significant improvements in diabetes care can occur with multifaceted interventions [18]  
39  
40 18 including disease management in the US [19] and integrated care in Germany [20] and  
41  
42 19 these can be associated with reductions in hospital costs [21]. The integrated care  
43  
44 20 intervention was successfully implemented across the area, with positive patient  
45  
46 21 experience, improved practice nurse clinical confidence, and early reports of clinical  
47  
48 22 benefit [13, 14, 22]. It is therefore surprising that although some (small) positive benefit  
49  
50 23 was observed in the intervention area, the return on the investment of GBP250,000 was  
51  
52 24 not greater and possibly less than in one of the control areas. Elsewhere, diabetes  
53  
54 25 integrated care interventions have generally been more effective within single providers  
55  
56  
57  
58  
59  
60

1  
2  
3 1 or in contexts where multiple primary care organisations work with a single specialist  
4  
5 2 provider under an integrated insurance scheme [6]. The integrated care intervention  
6  
7 3 carried out in ECF followed a nurse led service with one of the goals reducing referrals (ie  
8  
9 4 payments) to hospital outpatients. This philosophy, rather than progressing to truly  
10  
11 5 integrated services carried through the intervention period, albeit as part of a wider  
12  
13 6 programme that included ‘vertical integration’ developments. It was perhaps to be  
14  
15 7 expected that attempts at creating such greater ‘vertical’ integration in information  
16  
17 8 management, clinical governance, budget and overall management were agreed but not  
18  
19 9 implemented, actions more achievable within a single organization. There was an  
20  
21 10 attempt to create a single equal partner network model [23] nearing the end of the  
22  
23 11 intervention period, but this as not funded by the local commissioners.

24  
25  
26 12 The failure to implement integrated information management, almost certainly  
27  
28 13 contributed to communication and integration difficulties. Most integrated care  
29  
30 14 initiatives attempt to include data sharing [24] and this was not possible within the local  
31  
32 15 information governance arrangements. This was noticed by the patients and was a  
33  
34 16 source of frustration. Interestingly, integration was perceived as happening when there  
35  
36 17 was one person ‘fronting up’ for all those involved. Case management has been proposed  
37  
38 18 as one approach to integration, and requires the case manager to corral and coordinate  
39  
40 19 the services for a given individual [19].

41  
42  
43  
44 20 Whether our findings are due to a unique set of circumstances, or expected as part of a 3  
45  
46 21 compartment model (primary care, intermediate care, and secondary care) is unclear, but  
47  
48 22 there are indications that the circumstances are not special. There are calls for more  
49  
50 23 integration and less fragmentation in health care [24], yet the evidence on what works in  
51  
52 24 England is limited [25, 26]. The latest changes in commissioning in the English NHS, with  
53  
54 25 emphasis on the need to consider ‘Any qualified Provider’ in service delivery, and

1 associated market procurement approaches, could well impair the quality of diabetes  
2 care while increasing overall cost, if the experience here is reproduced elsewhere.  
3 Similarly, as a 'natural experiment', it was not possible to measure the impact of  
4 integrated care on inpatient payments at an individual level. Instead, we estimated the  
5 proportion of the population showing 'health gain' (reduced inpatient payments) from  
6 the integrated care intervention by using the distribution curve of inpatient payment.  
7 Although the method was within the conceptual framework proposed by Sakardi, some  
8 modifications to the methodology were made to overcome methodological drawbacks,  
9 for example requiring the same standard deviation for two Gaussian curves: something  
10 unlikely to occur in real scenarios. We believe this revised method would be more  
11 applicable to evaluate the 'health gain' for interventions at a population level.

12 There are limitations to our study. This was not a randomised trials, so any changes could  
13 be due to secular trends, although we do compare with the two other areas in  
14 Cambridgeshire. The data depended on the completeness of the coding of diabetes, and  
15 there being no systematic change in coding over this time period. We found that at least  
16 one provider had high diabetes ascertainment [10]. Data access restrictions prevented  
17 adjustment for some important co-variables. As the data used was record- rather than  
18 individual based, repeat inpatient records were unable to be linked, however, the record-  
19 based data still provides a range of plausible estimations. Moreover, within a relatively  
20 fixed diabetes population served by a local 'closed' inpatient care and tariff system, the  
21 likelihood for patients having a second hospital admission, would still be relatively low  
22 (although higher than those without diabetes) [10]. In another words, inpatient  
23 payments at two time-points are considered completely independent of each other. We  
24 acknowledge that this current analysis still yields findings subject to confounding bias  
25 unable to be measured in this study. The 'impact' observed in our study may therefore

1  
2  
3 1 only reflect measured changes in the DICI and 'control' regions respectively, rather than  
4  
5 2 due to the DICI itself, as the DICI care model was not randomly assigned.  
6  
7  
8 3 In conclusion, we have applied a modified novel strategy to measure 'health gain'  
9  
10 4 associated with an integrated care intervention at a population level. We found that  
11  
12 5 there were no differences in inpatient payments. Our findings suggest that irrespective of  
13  
14 6 the ideal principles behind integration, linking multiple health providers to deliver  
15  
16 7 population based diabetes care is complex and improvements in health outcomes remain  
17  
18 8 difficult to achieve.  
19  
20  
21 9

## 10 References

- 11 1. Kar P. The 'super six' for the acute trust; all else under primary care? *Practical diabetes* 2011;28: 308-309
- 12 12 2. Nagi D, Wilson J. Integrated diabetes care: the Wakefield diabetes service redesign. *Practical diabetes* 2011;28: 310-311
- 13 14 3. Rea RD, Gregory S, Browne M, Iqbal M, Holloway S, Munir M, Rose H, Gray T, Prescott D, Jarvis S, DiStefano G, Tan GD. Integrated diabetes care in Derby: new NHS organisations for new NHS challenges. *Practical diabetes* 2011;28: 312-313
- 15 16 17 4. Kanavos, Panos and van den Aardweg, Stacey and Schurer, Willemien (2012) Diabetes expenditure, burden of disease and management in 5 EU countries. The London School of Economics and Political Science, London, UK.
- 18 19 20 21
- 22 22 5. Arts EEA, Landewe-Cleuren SANT, Schaper NC, Vrijhoef HJM. The cost-effectiveness of substituting physicians with diabetes nurse specialists: a randomized controlled trial with 2-year follow-up. *Journal of Advanced Nursing* 2012; 68: 1224-1234
- 23 24 25 6. Simmons D, Yu D, Bunn C, Cohn S, Wenzel H, Prevost T. Hospitalisation among patients with diabetes associated with a Diabetes Integrated Care Initiative: a mixed methods case study. *Future Hosp J.* 2015; 2(2): 92-98.
- 26 27 28 7. Wenzel H, Simmons D. Chapter-1: An introduction to integrated care and diabetes integrated care. *Integrated Diabetes Care: A Multidisciplinary Approach*. Springer (2016).
- 29 30 8. Wilson A, O'Hare JP, Hardy A, Raymond N, Szczepura A, Crossman R, Baines D, Khunti K, Kumar S, Saravanan P; ICCD trial group. Evaluation of the clinical and cost effectiveness of intermediate care clinics for diabetes (ICCD): a multicentre cluster randomised controlled trial. *PLoS One.* 2014;9(4):e93964.
- 31 32 33 9. Sarkadi A, Sampaio F, Kelly MP, Feldman I. A novel approach used outcome distribution curves to estimate the population-level impact of a public health intervention. *J Clin Epidemiol* 2014; 67: 785-92
- 34 35 36 10. Simmons D, Wenzel H. Diabetes inpatients: a case of lose, lose, lose. Is it time to use a 'diabetes-attributable hospitalization cost' to assess the impact of diabetes? *Diabet Med.* 2011;28(9):1123-30.
- 37 38 39 11. Simmons D, Yu D, Wenzel H. Changes in hospital admissions and inpatient tariff associated with a Diabetes Integrated Care Initiative: preliminary findings. *J Diabetes* 2014; 6: 81-9
- 40 41

- 1  
2  
3  
4  
5  
6  
7  
8  
9  
10  
11  
12  
13  
14  
15  
16  
17  
18  
19  
20  
21  
22  
23  
24  
25  
26  
27  
28  
29  
30  
31  
32  
33  
34  
35  
36  
37  
38  
39  
40  
41  
42
12. Hollern H, Lunn J. Development of a primary care specialist diabetes nursing service. *J Diabetes Nursing* 2004; 8:344-348
  13. Simmons D, Yu D, Wenzel H. Changes in hospital admissions and inpatient tariff associated with a Diabetes Integrated Care Initiative: preliminary findings. *J Diabetes* 2014; 6: 81-9
  14. Harwood E, Bunn C, Caton C, Simmons D. Addressing barriers to diabetes care and self-care in general practice: A new framework for practice nurses. *J Diab Nursing* 2013; 17: 186-91
  15. Park SK, Wang W. Ambient Air Pollution and Type 2 Diabetes: A Systematic Review of Epidemiologic Research. *Curr Environ Health Rep.* 2014;1(3):275-286.
  16. Wild SH, McKnight JA, McConnachie A, Lindsay RS; Glasgow and Lothian Diabetes Register Data Group. Socioeconomic status and diabetes-related hospital admissions: a cross-sectional study of people with diagnosed diabetes. *J Epidemiol Community Health.* 2010;64(11):1022-4
  17. Bijlsma MJ. G-computation might be used to control for confounding when estimating the population level impact of interventions through outcome distribution curves. *J Clin Epidemiol.* 2014;67(11)1286.
  18. Renders CM, Valk GD, Griffin SJ, Wagner EH, Eijk Van JT. Interventions to Improve the Management of Diabetes in Primary Care, Outpatient, and Community Settings: A systematic review. *Diabetes Care* 2001;24:1821-1833
  19. Norris SL, Nichols PJ, Caspersen CJ, Glasgow, RE, Engelgau MM, Jack Jr L, Isham G, Snyder SR, Carande-Kulis VG, Garfield S, Briss P, McCulloch D. The Effectiveness of Disease and Case Management for People with Diabetes: A Systematic Review. *Am J Prev Med* 2002; 22: 15-38
  20. Rothe U, Muller G, Schwartz PEH, Seifert M, Kunath H, Koch R, Bergmann S, Julius U, Bornstein SR, Hanefeld M, Schulze J. Evaluation of a Diabetes Management System Based on Practice Guidelines, Integrated Care, and Continuous Quality Management in a Federal State of Germany: A population-based approach to health care research. *Diabetes Care* 2002; 25:684-689
  21. Sidorov J, Shull R. Tomcavage J, Girolami S, Lawton N, Harris R. Does Diabetes Disease Management Save Money and Improve Outcomes? *Diabetes Care* 2002; 25:684-688
  22. Hollern H, Simmons D. Cost saving and improved glycaemic control in an integrated diabetes service. *Primary Care Diabetes* 2011;13:176-181
  23. Simmons D, Wenzel H, Zgibor JC. Chapter-15: Diabetes integrated care: are we there yet? *Integrated Diabetes Care: A Multidisciplinary Approach.* Springer (2016).
  24. Ham C, Walsh N. Making integrated care happen at scale and pace. Kings Fund, London 2013.
  25. Ham C, Curry N. Integrated care: What is it? Does it work? What does it mean for the NHS? Kings fund, London 2011
  26. RAND Europe, Ernst & Young LLP. National Evaluation of the Department of Health's Integrated Care Pilots: final report:full version. RAND Europe, Ernst & Young LLP London 2012

### 43 Acknowledgements

44 The views expressed are those of the authors and not necessarily those of the NHS, the  
45 NIHR or the Department of Health.

### 46 Contributors

47 D.Y. analysed the data and drafted the manuscript; W.Y. revised the statistical methods  
48 and revised the manuscript; Y.C. validated the method and re-analysed the data  
49 independently; Z.Z. designed the analysis framework and revised manuscript; D.S.  
50 designed the study, revised the analysis framework, revised the manuscript and  
51 interpreted the findings.

1  
2  
3 **1 Funding**  
4

5  
6 2 This paper presents independent research funded by the National Institute for Health  
7 3 Research (NIHR) under its Research for Patient Benefit (RfPB) Programme (Grant  
8 4 Reference Number PB-PG-0808-17303).

9 **5 Competing interests**  
10

11 6 None declared.  
12

13 **7 Ethics approval**  
14

15  
16 8 No personal identifiers were released to researchers, and all subsequent analyses were  
17 9 conducted on anonymised datasets. The work had approval from the Cambridgeshire  
18 10 research ethics committee as part of a wider service evaluation and, as such, was deemed  
19 11 not to require personal informed consent.

20 **12 Provenance and peer review**  
21

22  
23  
24 13 Not commissioned; externally peer reviewed.  
25

26 **14 Data sharing statement**  
27

28 15 No additional data are available.  
29  
30  
31  
32  
33  
34  
35  
36  
37  
38  
39  
40  
41  
42  
43  
44  
45  
46  
47  
48  
49  
50  
51  
52  
53  
54  
55  
56  
57  
58  
59  
60

1  
2  
3 **1 Figure 1. Using the normal (Gaussian) curve to demonstrate the distribution of inpatient cost in**  
4 **2 people with type 2 diabetes and possible effects of an integrated care on the curve.**

5  
6 3  
7 4 *The differences between the respective areas under the curve are shaded. Health gains for*  
8 5 *participants with lower inpatient cost.*  
9 6 *Left top: East Cambridge and Fenland, <70 years; right top: East Cambridge and Fenland, ≥70 years;*  
10 7 *Left middle: Great Cambridge, <70 years; right middle: Great Cambridge, ≥70 years;*  
11 8 *Left bottom: Huntingdonshire, <70 years; right bottom: Huntingdonshire, ≥70 years.*  
12 9

13 10

14 11

15 12

16 13

17 14

18 15

19 16

For peer review only

**Table 1: Sample size of the inpatient payment records**

|                  | East Cambridge and Fenland |           | Huntingdonshire |           | Great Cambridge |           |
|------------------|----------------------------|-----------|-----------------|-----------|-----------------|-----------|
|                  | <70 years                  | ≥70 years | <70 years       | ≥70 years | <70 years       | ≥70 years |
| <b>2008-2009</b> | 2012                       | 2028      | 1494            | 1664      | 1575            | 1329      |
| <b>2011-2012</b> | 2431                       | 2756      | 1871            | 1990      | 2004            | 1823      |

**Table 2. Distribution of age and inpatient cost among people with type 2 diabetes by region and year**

|                  |                  | East Cambridge and Fenland |                 | Huntingdonshire |                 | Great Cambridge |                  |
|------------------|------------------|----------------------------|-----------------|-----------------|-----------------|-----------------|------------------|
|                  |                  | <70 years                  | ≥70 years       | <70 years       | ≥70 years       | <70 years       | ≥70 years        |
| <b>2008-2009</b> | <b>Age, year</b> | 60 (51, 65)                | 78 (74, 82)     | 61 (52, 65)     | 77 (73, 83)     | 58 (48, 64)     | 78 (74, 82)      |
|                  | <b>Cost, £</b>   | 819 (506, 1860)            | 911 (531, 2473) | 808 (504, 1707) | 808 (531, 2251) | 933 (597, 1997) | 1151 (611, 2638) |
| <b>2011-2012</b> | <b>Age, year</b> | 60 (51, 65)                | 78 (74, 83)     | 60 (48, 66)     | 77 (73, 83)     | 59 (50, 66)     | 79 (75, 84)      |
|                  | <b>Cost, £</b>   | 683 (468, 1635)            | 823 (498, 2475) | 677 (502, 1666) | 808 (469, 2220) | 781 (505, 1688) | 1031 (611, 2508) |

The median (inter-quartile range (IQR)) was presented both for age and cost.

**Table 3. The estimated absolute ‘health cost gain (impact)’ after the intervention by age and region**

|                            |            | Impact, % | 95% confidence interval, % | P value (bootstrapping) |
|----------------------------|------------|-----------|----------------------------|-------------------------|
| East Cambridge and Fenland | < 70 years | 1.58      | (-1.91, 4.88)              | 0.051948                |
|                            | ≥70 years  | 2.74      | (1.29, 5.81)               | 0.014985                |
| Huntingdonshire            | < 70 years | 1.83      | (-2.44, 5.87)              | 0.220779                |



|                   |            |       |               |          |
|-------------------|------------|-------|---------------|----------|
|                   | ≥70 years  | -2.06 | (-5.54, 3.79) | 0.737263 |
| Greater Cambridge | < 70 years | 3.20  | (1.77, 7.20)  | 0.004995 |
|                   | ≥70 years  | 4.14  | (2.27, 7.86)  | 0.000999 |

The health cost gain (impact) was defined as percentage of people with type 2 diabetes and hospital admission having reduced health cost after the integrated care at population level.

1  
2  
3  
4  
5  
6  
7  
8  
9  
10  
11  
12  
13  
14  
15  
16  
17  
18  
19  
20  
21  
22  
23  
24  
25  
26  
27  
28  
29  
30  
31  
32  
33  
34  
35  
36  
37  
38  
39  
40  
41  
42  
43  
44  
45  
46  
47  
48  
49  
50  
51  
52  
53  
54  
55  
56  
57  
58  
59  
60

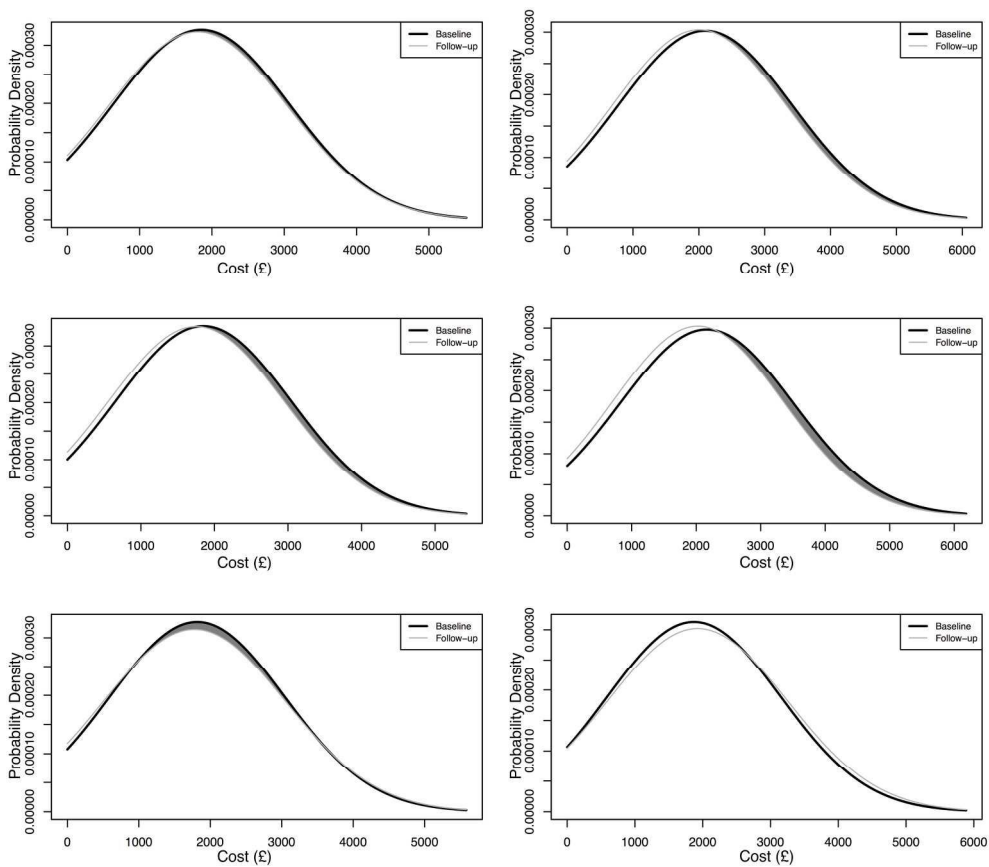

203x180mm (300 x 300 DPI)

only

## Consolidated Health Economic Evaluation Reporting Standards – CHEERS Checklist 1

**CHEERS Checklist****Items to include when reporting economic evaluations of health interventions**

The **ISPOR CHEERS Task Force Report**, *Consolidated Health Economic Evaluation Reporting Standards (CHEERS)—Explanation and Elaboration: A Report of the ISPOR Health Economic Evaluations Publication Guidelines Good Reporting Practices Task Force*, provides examples and further discussion of the 24-item CHEERS Checklist and the CHEERS Statement. It may be accessed via the *Value in Health* or via the ISPOR Health Economic Evaluation Publication Guidelines – CHEERS: Good Reporting Practices webpage: <http://www.ispor.org/TaskForces/EconomicPubGuidelines.asp>

| Section                         | Item No | Recommendation                                                                                                                                                                          | Reported on page No/line No |
|---------------------------------|---------|-----------------------------------------------------------------------------------------------------------------------------------------------------------------------------------------|-----------------------------|
| <b>Title and Abstract</b>       |         |                                                                                                                                                                                         |                             |
| Title                           | 1       | Identify the study as an economic evaluation or use more specific terms such as “cost-effectiveness analysis”, and describe the interventions compared.                                 | Page-1                      |
| Abstract                        | 2       | Provide a structured summary of objectives, perspective, setting, methods (including study design and inputs), results (including base case and uncertainty analyses), and conclusions. | Page-2                      |
| <b>Introduction</b>             |         |                                                                                                                                                                                         |                             |
| Background and objectives       | 3       | Provide an explicit statement of the broader context for the study.<br>Present the study question and its relevance for health policy or practice decisions.                            | Page-4                      |
| <b>Methods</b>                  |         |                                                                                                                                                                                         |                             |
| Target population and subgroups | 4       | Describe characteristics of the base case population and subgroups analysed, including why they were chosen.                                                                            | Page 4-5                    |
| Setting and location            | 5       | State relevant aspects of the system(s) in which the decision(s) need(s) to be made.                                                                                                    | Page 5                      |
| Study perspective               | 6       | Describe the perspective of the study and relate this to the costs being evaluated.                                                                                                     | Page 5                      |
| Comparators                     | 7       | Describe the interventions or strategies being compared and state why they were chosen.                                                                                                 | Page 5                      |
| Time horizon                    | 8       | State the time horizon(s) over which costs and consequences are being evaluated and say why appropriate.                                                                                | Page 5                      |
| Discount rate                   | 9       | Report the choice of discount rate(s) used for costs and outcomes and say why appropriate.                                                                                              | Page 5                      |
| Choice of health outcomes       | 10      | Describe what outcomes were used as the measure(s) of benefit in the evaluation and their relevance for the type of analysis performed.                                                 | Page 5-6                    |
| Measurement of effectiveness    | 11a     | <i>Single study-based estimates</i> : Describe fully the design features of the single effectiveness study and why the single                                                           | Page 5-6                    |

## Consolidated Health Economic Evaluation Reporting Standards – CHEERS Checklist 2

|                                                        |     |                                                                                                                                                                                                                                                                                                                                                       |        |
|--------------------------------------------------------|-----|-------------------------------------------------------------------------------------------------------------------------------------------------------------------------------------------------------------------------------------------------------------------------------------------------------------------------------------------------------|--------|
|                                                        |     | study was a sufficient source of clinical effectiveness data.                                                                                                                                                                                                                                                                                         |        |
|                                                        | 11b | <i>Synthesis-based estimates</i> : Describe fully the methods used for identification of included studies and synthesis of clinical effectiveness data.                                                                                                                                                                                               |        |
| Measurement and valuation of preference based outcomes | 12  | If applicable, describe the population and methods used to elicit preferences for outcomes.                                                                                                                                                                                                                                                           | Page 6 |
| Estimating resources and costs                         | 13a | <i>Single study-based economic evaluation</i> : Describe approaches used to estimate resource use associated with the alternative interventions. Describe primary or secondary research methods for valuing each resource item in terms of its unit cost. Describe any adjustments made to approximate to opportunity costs.                          |        |
|                                                        | 13b | <i>Model-based economic evaluation</i> : Describe approaches and data sources used to estimate resource use associated with model health states. Describe primary or secondary research methods for valuing each resource item in terms of its unit cost. Describe any adjustments made to approximate to opportunity costs.                          | Page 6 |
| Currency, price date, and conversion                   | 14  | Report the dates of the estimated resource quantities and unit costs. Describe methods for adjusting estimated unit costs to the year of reported costs if necessary. Describe methods for converting costs into a common currency base and the exchange rate.                                                                                        | Page 6 |
| Choice of model                                        | 15  | Describe and give reasons for the specific type of decision-analytical model used. Providing a figure to show model structure is strongly recommended.                                                                                                                                                                                                | Page 6 |
| Assumptions                                            | 16  | Describe all structural or other assumptions underpinning the decision-analytical model.                                                                                                                                                                                                                                                              | Page 6 |
| Analytical methods                                     | 17  | Describe all analytical methods supporting the evaluation. This could include methods for dealing with skewed, missing, or censored data; extrapolation methods; methods for pooling data; approaches to validate or make adjustments (such as half cycle corrections) to a model; and methods for handling population heterogeneity and uncertainty. | Page 6 |
| <b>Results</b>                                         |     |                                                                                                                                                                                                                                                                                                                                                       |        |
| Study parameters                                       | 18  | Report the values, ranges, references, and, if used, probability distributions for all parameters. Report reasons or sources for distributions used to represent uncertainty where appropriate. Providing a table to show the input values is strongly recommended.                                                                                   | Page 7 |
| Incremental costs and outcomes                         | 19  | For each intervention, report mean values for the main categories of estimated costs and outcomes of interest, as well as mean differences between the comparator groups. If                                                                                                                                                                          | Page 7 |

## Consolidated Health Economic Evaluation Reporting Standards – CHEERS Checklist 3

|                                                                      |     |                                                                                                                                                                                                                                                                              |          |
|----------------------------------------------------------------------|-----|------------------------------------------------------------------------------------------------------------------------------------------------------------------------------------------------------------------------------------------------------------------------------|----------|
|                                                                      |     | applicable, report incremental cost-effectiveness ratios.                                                                                                                                                                                                                    |          |
| Characterizing uncertainty                                           | 20a | <i>Single study-based economic evaluation</i> : Describe the effects of sampling uncertainty for the estimated incremental cost and incremental effectiveness parameters, together with the impact of methodological assumptions (such as discount rate, study perspective). |          |
|                                                                      | 20b | <i>Model-based economic evaluation</i> : Describe the effects on the results of uncertainty for all input parameters, and uncertainty related to the structure of the model and assumptions.                                                                                 | Page 7-8 |
| Characterizing heterogeneity                                         | 21  | If applicable, report differences in costs, outcomes, or cost-effectiveness that can be explained by variations between subgroups of patients with different baseline characteristics or other observed variability in effects that are not reducible by more information.   | Page 7-8 |
| <b>Discussion</b>                                                    |     |                                                                                                                                                                                                                                                                              |          |
| Study findings, limitations, generalizability, and current knowledge | 22  | Summarise key study findings and describe how they support the conclusions reached. Discuss limitations and the generalisability of the findings and how the findings fit with current knowledge.                                                                            | Page 8   |
| <b>Other</b>                                                         |     |                                                                                                                                                                                                                                                                              |          |
| Source of funding                                                    | 23  | Describe how the study was funded and the role of the funder in the identification, design, conduct, and reporting of the analysis. Describe other non-monetary sources of support.                                                                                          | Page 13  |
| Conflicts of interest                                                | 24  | Describe any potential for conflict of interest of study contributors in accordance with journal policy. In the absence of a journal policy, we recommend authors comply with International Committee of Medical Journal Editors recommendations.                            | Page 13  |

For consistency, the CHEERS Statement checklist format is based on the format of the CONSORT statement checklist

The **ISPOR CHEERS Task Force Report** provides examples and further discussion of the 24-item CHEERS Checklist and the CHEERS Statement. It may be accessed via the *Value in Health* link or via the ISPOR Health Economic Evaluation Publication Guidelines – CHEERS: Good Reporting Practices webpage: <http://www.ispor.org/TaskForces/EconomicPubGuidelines.asp>

The citation for the CHEERS Task Force Report is:  
 Husereau D, Drummond M, Petrou S, et al. Consolidated health economic evaluation reporting standards (CHEERS)—Explanation and elaboration: A report of the ISPOR health economic evaluations publication guidelines good reporting practices task force. *Value Health* 2013;16:231-50.

# BMJ Open

## Population-level impact of diabetes integrated care on commissioner payments for inpatient care among people with type 2 diabetes in Cambridgeshire

|                                 |                                                                                                                                                                                                                                                                                                                                                                                                                                                                                                                                                                                                                                        |
|---------------------------------|----------------------------------------------------------------------------------------------------------------------------------------------------------------------------------------------------------------------------------------------------------------------------------------------------------------------------------------------------------------------------------------------------------------------------------------------------------------------------------------------------------------------------------------------------------------------------------------------------------------------------------------|
| Journal:                        | <i>BMJ Open</i>                                                                                                                                                                                                                                                                                                                                                                                                                                                                                                                                                                                                                        |
| Manuscript ID                   | bmjopen-2017-015816.R2                                                                                                                                                                                                                                                                                                                                                                                                                                                                                                                                                                                                                 |
| Article Type:                   | Research                                                                                                                                                                                                                                                                                                                                                                                                                                                                                                                                                                                                                               |
| Date Submitted by the Author:   | 20-Oct-2017                                                                                                                                                                                                                                                                                                                                                                                                                                                                                                                                                                                                                            |
| Complete List of Authors:       | Yu, Dahai; the First Affiliated Hospital, Zhengzhou University, Department of Nephrology; Keele University, Arthritis Research UK Primary Care Centre, Research Institute for Primary Care & Health Sciences<br>Yang, Wei; the First Affiliated Hospital, Zhengzhou University, Department of Nephrology; Washington University in St Louis, School of Medicine<br>cai, yamei; the First Affiliated Hospital, Zhengzhou University, Department of Nephrology<br>Zhao, Zhanzheng; the First Affiliated Hospital, Zhengzhou University, Department of Nephrology<br>Simmons, David; Western Sydney University, Macarthur Clinical School |
| <b>Primary Subject Heading</b>: | Diabetes and endocrinology                                                                                                                                                                                                                                                                                                                                                                                                                                                                                                                                                                                                             |
| Secondary Subject Heading:      | Research methods                                                                                                                                                                                                                                                                                                                                                                                                                                                                                                                                                                                                                       |
| Keywords:                       | intergrated care, Diabetes, Intervention studies, Area under the curve                                                                                                                                                                                                                                                                                                                                                                                                                                                                                                                                                                 |
|                                 |                                                                                                                                                                                                                                                                                                                                                                                                                                                                                                                                                                                                                                        |

SCHOLARONE™  
Manuscripts

1  
2  
3 **Title Page**

4 **Title:** Population-level impact of diabetes integrated care on commissioner payments for  
5 inpatient care among people with type 2 diabetes in Cambridgeshire

6 **Authors:** Dahai Yu <sup>1,2</sup>, Wei Yang <sup>1,3</sup>, Yamei Cai <sup>1</sup>, Zhanzheng Zhao <sup>1\*</sup>, David Simmons  
7 <sup>4\*</sup>

8  
9  
10 1. Department of Nephrology, the First Affiliated Hospital, Zhengzhou University,  
11 Zhengzhou 450052, China

12  
13  
14 2. Arthritis Research UK Primary Care Centre, Research Institute for Primary Care  
15 & Health Sciences, Keele University, Keele ST5 5BG, UK

16  
17  
18 3. School of Medicine, Washington University in St Louis, 660 S Euclid Ave, St.  
19 Louis, MO 63110, United States

20  
21 4. Western Sydney University, Campbelltown, Sydney NSW 2751, Australia

22  
23  
24 **\*Correspondence 1 (China):**

25 Professor Zhanzheng Zhao, Department of Nephrology, The First Affiliated  
26 Hospital

27 Zhengzhou University, Zhengzhou 450052, CHINA

28 Email: [zhanzhengzhao@zzu.edu.cn](mailto:zhanzhengzhao@zzu.edu.cn)

29 TEL:+86 139 3852 5666

30 FAX:+86 371 6698 8753

31  
32  
33 **\*Correspondence 2 (Australia):**

34 Professor David Simmons, Macarthur Clinical School, School of Medicine, Western  
35 Sydney University, Locked Bag 1797, Campbelltown NSW 2751, AUSTRALIA

36 Email: [dsworkster@gmail.com](mailto:dsworkster@gmail.com)

37 TEL: (61+2) 4620 3899

38 FAX: (61+2) 4620 3890

39  
40  
41  
42  
43 Words in the main text: 2,178

44 Words in the abstract: 222

45 Tables: 3

46 Figures: 1

47 References: 26

48 Online Appendix: 1

49  
50  
51  
52  
53 Keywords: Diabetes; Integrated care; Intervention studies; Area under the curve

54  
55  
56  
57  
58  
59  
60

1  
2  
3 1 Abstract

4 2 **Objectives**

5 3 Few studies have estimated the effect of diabetes integrated care at a population level.  
6 4 We have assessed the impact of introducing a community service led diabetes integrated  
7 5 care programme on commissioner payments (tariff) for inpatient care in rural England.

8  
9  
10 6 **Methods**

11 7 The Diabetes Integrated Care Initiative (DICI) was delivered by a separate enhanced  
12 8 community diabetes service, increasing specialist nursing, dietetic, podiatry and medical  
13 9 support to primary care and patients, while linking into other diabetes specialist services.  
14 10 Commissioner data was provided by the local authority. The difference in area between  
15 11 the two overlapping distribution curves of inpatient payments at baseline and follow-up  
16 12 (at 3 years) was used to estimate the effect of integrated care on commissioner inpatient  
17 13 payments on a population level.

18  
19  
20 14 **Results**

21 15 Over the three-year period, reduced inpatient payments occurred in 2.7 (1.3 to 5.8) % of  
22 16 patients with diabetes aged more than 70 years in the Intervention area. However,  
23 17 reduced diabetes inpatient payments occurred in 3.20 (1.77 to 7.20) % of patients aged <70  
24 18 years and 4.1 (2.3 to 7.9) % of patients ≥aged more than 70 years in one of the two  
25 19 adjacent areas.

26  
27 20 **Conclusion**

28  
29 21 This enhanced community diabetes services was not associated with substantially  
30 22 reduced inpatient payments. Alternative diabetes integrated care approaches (eg with  
31 23 direct primary and secondary care collaboration rather than with a community service)  
32 24 should be tested.

33 25

34 26

35 27

36 28

37 29

38 30

39 31

40 32

41 33

42 34

43 35

44 36

45 37

46 38

47 39

48 40

49 41

50 42



1  
2  
3  
4  
5  
6  
7  
8  
9  
10  
11  
12  
13  
14  
15  
16  
17  
18  
19  
20  
21  
22  
23  
24  
25  
26  
27  
28  
29  
30  
31  
32  
33  
34  
35  
36  
37  
38  
39  
40  
41  
42  
43  
44  
45  
46  
47  
48  
49  
50  
51  
52  
53  
54  
55  
56  
57  
58  
59  
60

## Strengths and limitations of this study

- This study used a novel method to calculate the impact of interventions at a population-level by comparing the area under the distribution curves before and after an intervention.
- The ‘health gain’ in the revised method was clearly defined with a formulated algorithm of evaluation, which broadened the utilization scenarios especially when negative values were raised.
- With application of this novel method, this study found that the integrated diabetes care approach used was not associated with substantially reduced inpatient payments.
- The data used in this study depended upon the completeness of the coding for diabetes in the GP records. The impact of this potential ascertainment bias should have been steady as no systematic change in coding was known to have occurred over this time period.

## 1 Introduction

2 As the social and economic impact of diabetes grows, so does the variety of attempts to  
3 improve care quality and reduce health care costs among those affected [1, 2, 3, 4]. One  
4 approach, able to provide at least equivalent care to routine medical care with some  
5 types of patients, has been the introduction of nurses working within protocols, within  
6 medical services [5]. Other models known as ‘intermediate care’, including general  
7 practitioners with a special interest [6], and community diabetes nursing services [6]  
8 have been implemented, but without robust evaluation. As a proposed system,  
9 integrated care articulates all health workers and health systems around the needs of  
10 each patient and should be associated with improved outcomes and less cost [7].

11 However, the impact of a population based integrated care intervention is difficult to  
12 measure on an individual level. One randomised trial of an intermediate care service  
13 achieved minimal actual incremental benefit [8]. By their nature, randomised controlled  
14 trials are difficult to utilise when assessing the impact of a complete system change at a  
15 population level. . Sarkadi et al have proposed a method to look at population outcomes  
16 in their own right in the quest of understanding how interventions work at a population  
17 level [9]. Under the English National Health Service (NHS), public inpatient care is paid  
18 for from taxation through local commissioners. These payments do not generally cover  
19 the hospital costs of inpatients with diabetes [10], but can provide an NHS commissioner  
20 perspective that reflects both acuity and complexity, beyond eg length of stay. We have  
21 now used the Sarkadi approach to assess whether any changes in population based  
22 commissioner inpatient payment data occurred during a diabetes integrated care  
23 intervention by viewing the level and distribution of commissioner inpatient payments in  
24 the population as the unit of interest.

## 25 Methods

1  
2  
3 1 East Cambridgeshire and Fenland (ECF: 2009 population 160,000, diabetes population  
4  
5 2 7,790) is largely rural, with a small number of socioeconomically deprived communities  
6  
7 3 [6]. There is no local major hospital (with eg an emergency department), falling within  
8  
9 4 the catchment areas of 4 hospitals outside of the area. Some diabetes outcomes have  
10  
11 5 been historically poor [11]. A separate, local, diabetes specialist nurse (DSN) led  
12  
13 6 community service was introduced in 2003 [12]. From April 2009, this was replaced with a  
14  
15 7 new Diabetes Integrated Care Initiative (DICI) using additional finance (£250,000 pa), in  
16  
17 8 an attempt to address continuing health disparities [13]. The components of the DICI has  
18  
19 9 been described in the previous publications [14]. The health district includes two other  
20  
21 10 areas, Huntingdonshire and Greater Cambridge, which did not receive the full  
22  
23 11 intermediate team and are able to serve as ‘control’ areas, although each hospital based  
24  
25 12 service would have continued with its own internal service developments. We have  
26  
27 13 previously reported no impact on metabolic control or hospitalisation rates in spite of full  
28  
29 14 implementation of the service [6].

30  
31  
32  
33 15 De-identified electronic Secondary Uses Service (SUS) data for across Cambridgeshire  
34  
35 16 were obtained for recorded inpatient tariff between April 2007 (ie 2 years before the DICI  
36  
37 17 contract commenced) and March 2012. Practice, patient age, elective/non elective status,  
38  
39 18 ICD10 and Health Related Group (HRG) coding were included in the dataset. Diabetes  
40  
41 19 was considered present if E10-E14 was in any ICD10 field and, as the primary cause of  
42  
43 20 admission if coded in the first field [15, 16]. Inpatient payments recorded in 2008-2009  
44  
45 21 were used as baseline, to compare with that recorded in 2011-2012 as the end of the  
46  
47 22 intervention period. Using the Sarkadi et. al. method, the mean and standard deviation  
48  
49 23 for normal distributions before and after the intervention can be estimated. The “health  
50  
51 24 gain” is defined as the area between the two distribution curves on the right side, where  
52  
53 25 the distribution density after intervention is lower (the shaded area in supplemental **Error!**  
54  
55 26 **Reference source not found.** left). In our study, ‘health gain’ represents the proportion

1 of patients with reduced inpatient payments between the baseline and intervention  
2 period. The reduction in commissioner payments reflects reduced needs in care and thus  
3 improvement in health.

4  
5 Sarkadi's method has outlined ways to calculate the impact when the two distributions  
6 have the same standard deviation (SD), or when the follow-up group has smaller mean  
7 and smaller SD at the same time. However we have noticed when using real data that the  
8 follow-up-group might have smaller mean but larger SD. To accommodate this situation,  
9 we have modified the Sarkadi's method as described in online supplemental technical  
10 appendix and online supplemental Figure 1. The health gain distributions are presented in  
11 online supplemental Figure-2 to illustrate the health gains at a population level.

12  
13 In addition to the Normal distribution originally used in Sakadi's method, three other  
14 distributions, Gamma distribution, Log-Normal distribution and Normal distribution of  
15 log-transferred payment data were attempted to fit the data. The goodness-of-fit  
16 statistics, Akaike information criterion (AIC), Bayesian information criterion (BIC), and log-  
17 likelihood were tested over four distributions and the distribution with the minimum AIC,  
18 BIC and maximum log-likelihood was chosen as the final distribution to examine the  
19 impact.

20  
21 Bootstrapping is used to obtain a p value for the probability of health gain larger than  
22 zero. We randomly sampled data points with replacements from the original data  
23 separately for the baseline and follow-up, so that we obtain bootstrapped data with the  
24 same numbers of data points. These are used to obtain an estimation of the health gain

1 after perturbation. This process is repeated 1000 times. The probability of observing  
2 estimations less than or equal to zero is calculated, and used as the approximation of the  
3 p value for testing whether health gain is significantly larger than zero.

4 No personal identifiers were released to researchers, and all subsequent analyses were  
5 conducted on anonymised datasets. Age data were provided allowing analyses to be  
6 undertaken above and below the median age (70 years) to assess any related variation.

7 The work had approval from the Cambridgeshire research ethics committee as part of a  
8 wider service evaluation and, as such, was deemed not to require personal informed  
9 consent.

10 All analyses were conducted in R [Version 3.1]. Ethics approval was received from the  
11 National Research Ethics Service Committee- East of England.

## 14 **Results**

15 The sample size of inpatient payment records during the baseline and the intervention  
16 period in each region is presented in Table 1. The inpatient payments during the baseline  
17 period and the intervention period are shown in Table 2 by area and age group. In each  
18 area and age group, a lower individual median inpatient payment was more likely to be  
19 found in the intervention period.

20 Figure-1 shows the distribution of the inpatient payments in people with type 2 diabetes  
21 in the baseline and intervention periods. This illustrates the effect of the integrated care  
22 intervention, as the left-moving curve in the intervention period indicates the potential  
23 inpatient payment saving at a population level.

1  
2  
3 1 Four distribution (Normal distribution, Gamma distribution, Log-Normal distribution and  
4  
5 2 Normal distribution of log-transformed payment data) were attempted to fit the  
6  
7 3 payment data as presented in Supplemental Table 1. The Normal distribution of log-  
8  
9 4 transformed payment data was chosen to estimate the impact on the intervention for its  
10  
11 5 minimum AIC and BIC and its maximum log-likelihood.

12  
13  
14 6 The magnitude of the intervention at the population level is presented in Table-3.  
15  
16 7 Significant 'health gain' was observed both in the intervention area and control areas,  
17  
18 8 especially among patients aged less than 70 years. In the intervention area, East  
19  
20 9 Cambridge and Fenland, 7.69% (95 Confidence Interval (CI) 5.89-9.74%) and 2.05% (0.72 to  
21  
22 10 4.13%) of patients aged less than 70 years and aged more than 70 years, respectively had a  
23  
24 11 reduced inpatient payment, compared with the population in the baseline period. In  
25  
26 12 Huntingdonshire, the 'health gain' was 6.90% (5.63 to 8.68%) and 4.62% (2.22 to 7.23%)  
27  
28 13 among patients aged less than 70 years and patients aged more than 70 years,  
29  
30 14 respectively. In Greater Cambridge, the 'health gain' was 7.59% (5.63 to 9.94%) and 2.49%  
31  
32 15 (1.46 to 4.58%) among patients aged less than 70 years and patients aged more than 70  
33  
34 16 years, respectively.

35  
36  
37  
38 17 To allow comparisons, the estimated impact, based on a Normal distribution, is presented  
39  
40 18 in Supplemental Table 2. In the intervention area, East Cambridge and Fenland, 2.74%  
41  
42 19 (1.29 to 5.81%) of patients aged more than 70 years had a reduced inpatient payment,  
43  
44 20 compared with the population in the baseline period. In one of the control areas, Greater  
45  
46 21 Cambridge, 'health gain' was also observed in 3.20 (1.77 to 7.20) % of patients aged less  
47  
48 22 than 70 years and 4.14 (2.27 to 7.86) % patients aged more than 70 years, respectively.  
49  
50 23 Significant 'health gain' was not identified within the population in Huntingdonshire over  
51  
52 24 the study period.

53  
54  
55 25

1

2 **Discussion**

3

4 We have used a novel way, calculating the total health gain (proportion of people with  
5 reduced inpatient payments) assuming a Gaussian distribution, to assess the results of  
6 integrated care in the diabetic population of areas in Cambridgeshire through a  
7 population lens. The study revealed a possible effect of the new integrated care  
8 approach on inpatient payments, as 7.7% of patients aged less than 70 years and 2.1% of  
9 patients aged more than 70 years had reduced inpatient payments in the intervention  
10 area, East Cambridge and Fenland. However, reductions were also seen in the control  
11 areas, in Huntingdonshire, 6.9% of patients aged less than 70 years and 4.6 % of patients  
12 aged less than 70years had reduced inpatient payment; in Greater Cambridge, 7.6% of  
13 patients aged less than 70 years and 2.5 % of patients aged less than 70years had reduced  
14 inpatient. The 95% confidence intervals overlapped across the 3 areas, so we have not  
15 shown any differences between the areas.

16

17 Significant improvements in diabetes care can occur with multifaceted interventions [17]  
18 including disease management in the US [18] and integrated care in Germany [19] and  
19 these can be associated with reductions in hospital costs [20]. The integrated care  
20 intervention was successfully implemented across the area, with positive patient  
21 experience, improved practice nurse clinical confidence, and early reports of clinical  
22 benefit [13, 14, 21]. It is therefore surprising that although some (small) positive benefit  
23 was observed in the intervention area, the return on the investment of GBP250,000 was  
24 not greater and possibly less than in one of the control areas. Elsewhere, diabetes  
25 integrated care interventions have generally been more effective within single providers

1  
2  
3 1 or in contexts where multiple primary care organisations work with a single specialist  
4  
5 2 provider under an integrated insurance scheme [6]. The integrated care intervention  
6  
7 3 carried out in ECF followed a nurse led service with one of the goals reducing referrals (ie  
8  
9 4 payments) to hospital outpatients. This philosophy, rather than progressing to truly  
10  
11 5 integrated services carried through the intervention period, albeit as part of a wider  
12  
13 6 programme that included ‘vertical integration’ developments. It was perhaps to be  
14  
15 7 expected that attempts at creating such greater ‘vertical’ integration in information  
16  
17 8 management, clinical governance, budget and overall management were agreed but not  
18  
19 9 implemented, actions more achievable within a single organization. There was an  
20  
21 10 attempt to create a single equal partner network model [22] nearing the end of the  
22  
23 11 intervention period, but this as not funded by the local commissioners.

24  
25  
26 12 The failure to implement integrated information management, almost certainly  
27  
28 13 contributed to communication and integration difficulties. Most integrated care  
29  
30 14 initiatives attempt to include data sharing [23] and this was not possible within the local  
31  
32 15 information governance arrangements. This was noticed by the patients and was a  
33  
34 16 source of frustration. Interestingly, integration was perceived as happening when there  
35  
36 17 was one person ‘fronting up’ for all those involved. Case management has been proposed  
37  
38 18 as one approach to integration, and requires the case manager to corral and coordinate  
39  
40 19 the services for a given individual [18].

41  
42  
43  
44 20 Whether our findings are due to a unique set of circumstances, or expected as part of a 3  
45  
46 21 compartment model (primary care, intermediate care, and secondary care) is unclear, but  
47  
48 22 there are indications that the circumstances are not special. There are calls for more  
49  
50 23 integration and less fragmentation in health care [23], yet the evidence on what works in  
51  
52 24 England is limited [24, 25]. The latest changes in commissioning in the English NHS, with  
53  
54 25 emphasis on the need to consider ‘Any qualified Provider’ in service delivery, and



1  
2  
3 1 associated market procurement approaches, could well impair the quality of diabetes  
4  
5 2 care while increasing overall cost, if the experience here is reproduced elsewhere.  
6  
7 3 Similarly, as a 'natural experiment', it was not possible to measure the impact of  
8  
9 4 integrated care on inpatient payments at an individual level. Instead, we estimated the  
10  
11 5 proportion of the population showing 'health gain' (reduced inpatient payments) from  
12  
13 6 the integrated care intervention by using the distribution curve of inpatient payment.  
14  
15 7 Although the method was within the conceptual framework proposed by Sakardi, some  
16  
17 8 modifications to the methodology were made to overcome methodological drawbacks,  
18  
19 9 for example requiring the same standard deviation for two Gaussian curves: something  
20  
21 10 unlikely to occur in real scenarios. We believe this revised method would be more  
22  
23 11 applicable to evaluate the 'health gain' for interventions at a population level.  
24  
25  
26  
27 12 There are limitations to our study. This was not a randomised trials, so any changes could  
28  
29 13 be due to secular trends, although we do compare with the two other areas in  
30  
31 14 Cambridgeshire. The data depended on the completeness of the coding of diabetes, and  
32  
33 15 there being no systematic change in coding over this time period. We found that at least  
34  
35 16 one provider had high diabetes ascertainment [10]. Data access restrictions prevented  
36  
37 17 adjustment for some important co-variables. As the data used was record- rather than  
38  
39 18 individual based, repeat inpatient records were unable to be linked, however, the record-  
40  
41 19 based data still provides a range of plausible estimations. Moreover, within a relatively  
42  
43 20 fixed diabetes population served by a local 'closed' inpatient care and tariff system, the  
44  
45 21 likelihood for patients having a second hospital admission, would still be relatively low  
46  
47 22 (although higher than those without diabetes) [10]. In other words, inpatient payments  
48  
49 23 at two time-points are considered completely independent of each other. We  
50  
51 24 acknowledge that this current analysis still yields findings subject to confounding bias  
52  
53 25 unable to be measured in this study. The 'impact' observed in our study may therefore  
54  
55  
56  
57  
58  
59  
60

1  
2  
3 1 only reflect measured changes in the DICI and ‘control’ regions respectively, rather than  
4  
5 2 due to the DICI itself, as the DICI care model was not randomly assigned. As a result of  
6  
7 3 data access restrictions, it is not possible in this study to identify those with multiple  
8  
9 4 admissions (and payments) that would provide ‘redundant information’. The application  
10  
11 5 of bootstrapping ignoring such redundant information might lead to a mis-application of  
12  
13 6 Sarkadi’s tool and might inadvertently increase the false positive rate: something to be  
14  
15 7 taken into consideration when interpreting the findings in this study. There might be  
16  
17 8 other potential unidentified confounders in this study and evaluation seeking other  
18  
19 9 confounding factors would be possible in future studies with more variables in the  
20  
21 10 dataset including a way to identify those confounders.  
22  
23  
24  
25  
26  
27  
28  
29

30 13 In conclusion, we have applied a modified novel strategy to measure ‘health gain’  
31  
32 14 associated with an integrated care intervention at a population level. We found that  
33  
34 15 there were no differences in inpatient payments. Our findings suggest that irrespective of  
35  
36 16 the ideal principles behind integration, linking multiple health providers to deliver  
37  
38 17 population based diabetes care is complex and improvements in health outcomes remain  
39  
40 18 difficult to achieve.  
41  
42  
43  
44  
45

## 46 20 **References**

- 47  
48  
49 21 1. Kar P. The ‘super six’ for the acute trust; all else under primary care? *Practical diabetes*  
50 22 2011;28: 308-309  
51 23 2. Nagi D, Wilson J. Integrated diabetes care: the Wakefield diabetes service redesign.  
52 24 *Practical diabetes* 2011;28: 310-311  
53 25 3. Rea RD, Gregory S, Browne M, Iqbal M, Holloway S, Munir M, Rose H, Gray T, Prescott D,  
54 26 Jarvis S, DiStefano G, Tan GD. Integrated diabetes care in Derby: new NHS organisations  
55 27 for new NHS challenges. *Practical diabetes* 2011;28: 312-313

- 1
- 2
- 3 1 4. Kanavos, Panos and van den Aardweg, Stacey and Schurer, Willemien (2012) Diabetes
- 4 2 expenditure, burden of disease and management in 5 EU countries. The London School of
- 5 3 Economics and Political Science, London, UK.
- 6 4
- 7 5 5. Arts EEA, Landewe-Cleuren SANT, Schaper NC, Vrijhoef HJM. The cost-effectiveness of
- 8 6 substituting physicians with diabetes nurse specialists: a randomized controlled trial with
- 9 7 2-year follow-up. *Journal of Advanced Nursing* 2012; 68: 1224–1234
- 10 8 6. Simmons D, Yu D, Bunn C, Cohn S, Wenzel H, Prevost T. Hospitalisation among patients
- 11 9 with diabetes associated with a Diabetes Integrated Care Initiative: a mixed methods case
- 12 10 study. *Future Hosp J.* 2015; 2(2): 92-98.
- 13 11 7. Wenzel H, Simmons D. Chapter-1: An introduction to integrated care and diabetes
- 14 12 integrated care. *Integrated Diabetes Care: A Multidisciplinary Approach.* Springer (2016).
- 15 13 8. Wilson A, O'Hare JP, Hardy A, Raymond N, Szczepura A, Crossman R, Baines D, Khunti K,
- 16 14 Kumar S, Saravanan P; ICCD trial group. Evaluation of the clinical and cost effectiveness of
- 17 15 intermediate care clinics for diabetes (ICCD): a multicentre cluster randomised controlled
- 18 16 trial. *PLoS One.* 2014;9(4):e93964.
- 19 17 9. Sarkadi A, Sampaio F, Kelly MP, Feldman I. A novel approach used outcome distribution
- 20 18 curves to estimate the population-level impact of a public health intervention. *J Clin*
- 21 19 *Epidemiol* 2014; 67: 785-92
- 22 20 10. Simmons D, Wenzel H. Diabetes inpatients: a case of lose, lose, lose. Is it time to use a
- 23 21 'diabetes-attributable hospitalization cost' to assess the impact of diabetes? *Diabet Med.*
- 24 22 2011;28(9):1123-30.
- 25 23 11. Simmons D, Yu D, Wenzel H. Changes in hospital admissions and inpatient tariff associated
- 26 24 with a Diabetes Integrated Care Initiative: preliminary findings. *J Diabetes* 2014; 6: 81-9
- 27 25 12. Hollern H, Lunn J. Development of a primary care specialist diabetes nursing service. *J*
- 28 26 *Diabetes Nursing* 2004; 8:344-348
- 29 27 13. Simmons D, Yu D, Wenzel H. Changes in hospital admissions and inpatient tariff associated
- 30 28 with a Diabetes Integrated Care Initiative: preliminary findings. *J Diabetes* 2014; 6: 81-9
- 31 29 14. Harwood E, Bunn C, Caton C, Simmons D. Addressing barriers to diabetes care and self-
- 32 30 care in general practice: A new framework for practice nurses. *J Diab Nursing* 2013; 17:
- 33 31 186–91
- 34 32 15. Park SK, Wang W. Ambient Air Pollution and Type 2 Diabetes: A Systematic Review of
- 35 33 Epidemiologic Research. *Curr Environ Health Rep.* 2014;1(3):275-286.
- 36 34 16. Wild SH, McKnight JA, McConnachie A, Lindsay RS; Glasgow and Lothian Diabetes
- 37 35 Register Data Group. Socioeconomic status and diabetes-related hospital admissions: a
- 38 36 cross-sectional study of people with diagnosed diabetes. *J Epidemiol Community Health.*
- 39 37 2010;64(11):1022-4
- 40 38 17. Renders CM, Valk GD, Griffin SJ, Wagner EH, Eijk Van JT. Interventions to Improve the
- 41 39 Management of Diabetes in Primary Care, Outpatient, and Community Settings: A
- 42 40 systematic review. *Diabetes Care* 2001;24:1821–1833
- 43 41 18. Norris SL, Nichols PJ, Caspersen CJ, Glasgow, RE, Engelgau MM, Jack Jr L, Isham G, Snyder
- 44 42 SR, Carande-Kulis VG, Garfield S, Briss P, McCulloch D. The Effectiveness of Disease and
- 45 43 Case Management for People with Diabetes: A Systematic Review. *Am J Prev Med* 2002;
- 46 44 22: 15–38
- 47 45 19. Rothe U, Muller G, Schwartz PEH, Seifert M, Kunath H, Koch R, Bergmann S, Julius U,
- 48 46 Bornstein SR, Hanefeld M, Schulze J. Evaluation of a Diabetes Management System
- 49 47 Based on Practice Guidelines, Integrated Care, and Continuous Quality Management in a
- 50 48 Federal State of Germany: A population-based approach to health care research. *Diabetes*
- 51 49 *Care* 2002; 25:684–689
- 52 50 20. Sidorov J, Shull R. Tomcavage J, Girolami S, Lawton N, Harris R. Does Diabetes Disease
- 53 51 Management Save Money and Improve Outcomes? *Diabetes Care* 2002; 25:684–68
- 54 52 21. Hollern H, Simmons D. Cost saving and improved glycaemic control in an integrated
- 55 53 diabetes service. *Primary Care Diabetes* 2011;13:176-181
- 56 54 22. Simmons D, Wenzel H, Zgibor JC. Chapter-15: Diabetes integrated care: are we there yet?
- 57 55 *Integrated Diabetes Care: A Multidisciplinary Approach.* Springer (2016).

- 1  
2  
3 1 23. Ham C, Walsh N. Making integrated care happen at scale and pace. Kings Fund, London  
4 2 2013.  
5 3 24. Ham C, Curry N. Integrated care: What is it? Does it work? What does it mean for the NHS?  
6 4 Kings fund, London 2011  
7 5 25. RAND Europe, Ernst & Young LLP. National Evaluation of the Department of Health's  
8 6 Integrated Care Pilots: final report:full version. RAND Europe, Ernst & Young LLP London  
9 7 2012  
10 8

11  
12 9  
13  
14

## 15 10 **Acknowledgements**

16  
17  
18 11 The views expressed are those of the authors and not necessarily those of the NHS, the  
19 12 NIHR or the Department of Health.

## 20 13 **Contributors**

21  
22  
23 14 D.Y. analysed the data and drafted the manuscript; W.Y. revised the statistical methods  
24 15 and revised the manuscript; Y.C. validated the method and re-analysed the data  
25 16 independently; Z.Z. designed the analysis framework and revised manuscript; D.S.  
26 17 designed the study, revised the analysis framework, revised the manuscript and  
27 18 interpreted the findings.

## 29 19 **Funding**

30  
31  
32 20 This paper presents independent research funded by the National Institute for Health  
33 21 Research (NIHR) under its Research for Patient Benefit (RfPB) Programme (Grant  
34 22 Reference Number PB-PG-0808-17303).

## 35 23 **Competing interests**

36  
37  
38 24 None declared.

## 40 25 **Ethics approval**

41  
42  
43 26 No personal identifiers were released to researchers, and all subsequent analyses were  
44 27 conducted on anonymised datasets. The work had approval from the Cambridgeshire  
45 28 research ethics committee as part of a wider service evaluation and, as such, was deemed  
46 29 not to require personal informed consent.

## 47 30 **Provenance and peer review**

48  
49  
50 31 Not commissioned; externally peer reviewed.

## 52 32 **Data sharing statement**

53  
54  
55 33 No additional data are available.  
56  
57  
58  
59  
60

1  
2  
3 **1 Figure 1. Using the normal (Gaussian) curve to demonstrate the distribution of inpatient payment**  
4 **2 in people with type 2 diabetes and possible effects of an integrated care on the curve.**

5  
6 3  
7 4 *The differences between the respective areas under the curve are shaded. Health gains for*  
8 5 *participants with lower inpatient payment.*  
9 6 *Left top: East Cambridge and Fenland, <70 years; right top: East Cambridge and Fenland, ≥70 years;*  
10 7 *Left middle: Great Cambridge, <70 years; right middle: Great Cambridge, ≥70 years;*  
11 8 *Left bottom: Huntingdonshire, <70 years; right bottom: Huntingdonshire, ≥70 years.*  
12 9

13 10  
14 11  
15 12  
16 13  
17 14  
18 15  
19 16  
20  
21  
22  
23  
24  
25  
26  
27  
28  
29  
30  
31  
32  
33  
34  
35  
36  
37  
38  
39  
40  
41  
42  
43  
44  
45  
46  
47  
48  
49  
50  
51  
52  
53  
54  
55  
56  
57  
58  
59  
60

For peer review only

**Table 1: Sample size of the inpatient payment records**

|                  | East Cambridge and Fenland |           | Huntingdonshire |           | Great Cambridge |           |
|------------------|----------------------------|-----------|-----------------|-----------|-----------------|-----------|
|                  | <70 years                  | ≥70 years | <70 years       | ≥70 years | <70 years       | ≥70 years |
| <b>2008-2009</b> | 2012                       | 2028      | 1494            | 1664      | 1575            | 1329      |
| <b>2011-2012</b> | 2431                       | 2756      | 1871            | 1990      | 2004            | 1823      |

**Table 2. Distribution of age and inpatient payment among people with type 2 diabetes by region and year**

|                  |                             | East Cambridge and Fenland |                 | Huntingdonshire |                 | Great Cambridge |                  |
|------------------|-----------------------------|----------------------------|-----------------|-----------------|-----------------|-----------------|------------------|
|                  |                             | <70 years                  | ≥70 years       | <70 years       | ≥70 years       | <70 years       | ≥70 years        |
| <b>2008-2009</b> | <b>Age, year</b>            | 60 (51, 65)                | 78 (74, 82)     | 61 (52, 65)     | 77 (73, 83)     | 58 (48, 64)     | 78 (74, 82)      |
|                  | <b>Inpatient payment, £</b> | 819 (506, 1860)            | 911 (531, 2473) | 808 (504, 1707) | 808 (531, 2251) | 933 (597, 1997) | 1151 (611, 2638) |
| <b>2011-2012</b> | <b>Age, year</b>            | 60 (51, 65)                | 78 (74, 83)     | 60 (48, 66)     | 77 (73, 83)     | 59 (50, 66)     | 79 (75, 84)      |
|                  | <b>Inpatient payment, £</b> | 683 (468, 1635)            | 823 (498, 2475) | 677 (502, 1666) | 808 (469, 2220) | 781 (505, 1688) | 1031 (611, 2508) |

The median (inter-quartile range (IQR)) was presented both for age and inpatient payment.

**Table 3. The estimated absolute 'health gain (impact)' after the intervention by age and region: estimation based on Normal distribution of log transferred inpatient payment data**

|                            |            | Impact, % | 95% confidence interval, % | P value (bootstrapping) |
|----------------------------|------------|-----------|----------------------------|-------------------------|
| East Cambridge and Fenland | < 70 years | 7.69      | 5.89, 9.74)                | 0                       |
|                            | ≥70 years  | 2.05      | (0.72, 4.13)               | 0.044796                |

1  
2  
3  
4  
5  
6  
7  
8  
9  
10  
11  
12  
13  
14  
15  
16  
17  
18  
19  
20  
21  
22  
23  
24  
25  
26  
27  
28  
29  
30  
31  
32  
33  
34  
35  
36  
37  
38  
39  
40  
41  
42  
43  
44  
45  
46  
47

|                   |            |      |              |          |
|-------------------|------------|------|--------------|----------|
| Huntingdonshire   | < 70 years | 6.90 | (5.63, 8.68) | 0        |
|                   | ≥70 years  | 4.62 | (2.22, 7.23) | 0.001300 |
| Greater Cambridge | < 70 years | 7.59 | (5.63, 9.94) | 0        |
|                   | ≥70 years  | 2.49 | (1.46, 4.58) | 0.037096 |

The health gain (impact) was defined as percentage of people with type 2 diabetes and hospital admission having reduced inpatient payment after the integrated care at population level.

For peer review only

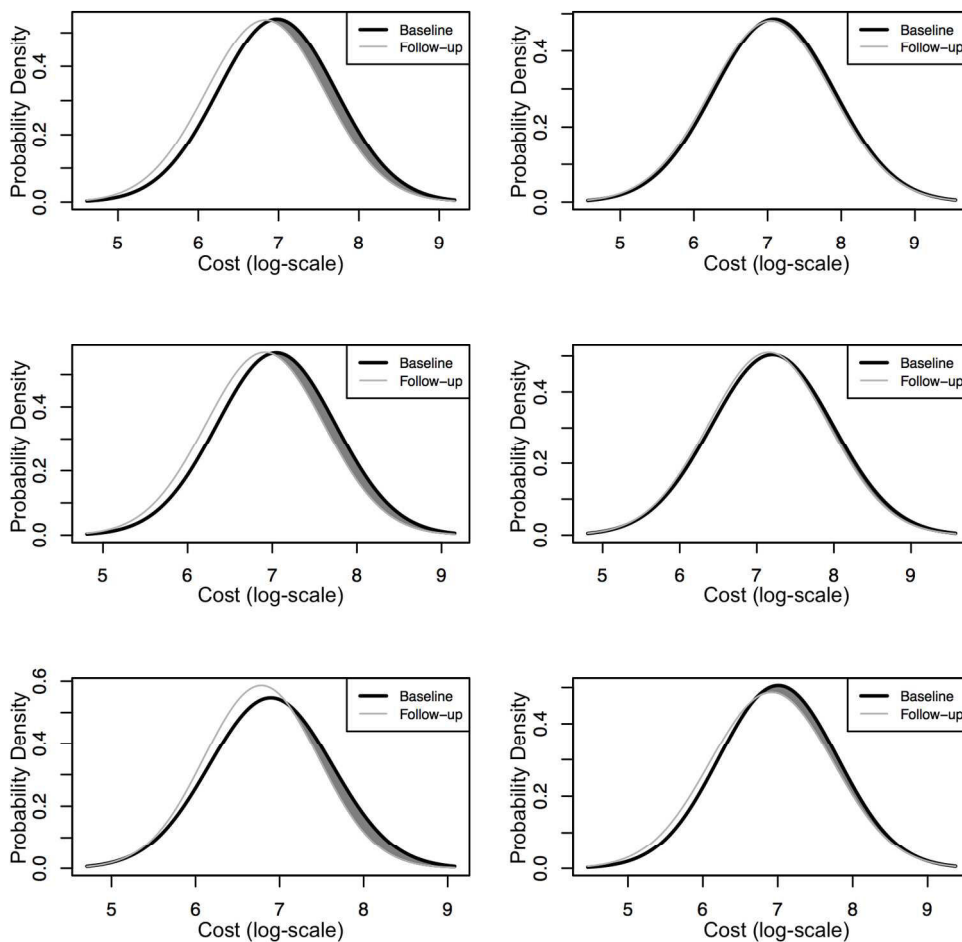

152x152mm (300 x 300 DPI)

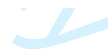



**Title:** Population-level impact of diabetes integrated care on payments for inpatient care among people with type 2 diabetes in Cambridgeshire

**Authors:** Dahai Yu <sup>1,2</sup>, Wei Yang <sup>1,3</sup>, Yamei Cai <sup>1</sup>, Zhanzheng Zhao <sup>1\*</sup>, David Simmons <sup>4\*</sup>

1. Department of Nephrology, the First Affiliated Hospital, Zhengzhou University, Zhengzhou 450052, China

2. Arthritis Research UK Primary Care Centre, Research Institute for Primary Care & Health Sciences, Keele University, Keele ST5 5BG, UK

3. School of Medicine, Washington University in St Louis, 660 S Euclid Ave, St. Louis, MO 63110, United States

4. Western Sydney University, Campbelltown, Sydney NSW 2751, Australia

**\*Correspondence 1 (China):**

Professor Zhanzheng Zhao, Department of Nephrology, The First Affiliated Hospital

Zhengzhou University, Zhengzhou 450052, CHINA

Email: [zhanzhengzhao@zzu.edu.cn](mailto:zhanzhengzhao@zzu.edu.cn)

TEL:+86 139 3852 5666

FAX:+86 371 6698 8753

**\*Correspondence 2 (Australia):**

Professor David Simmons, Macarthur Clinical School, School of Medicine, Western Sydney University, Locked Bag 1797, Campbelltown NSW 2751, AUSTRALIA

Email: [dsworkster@gmail.com](mailto:dsworkster@gmail.com)

TEL: (61+2) 4620 3899

FAX: (61+2) 4620 3890

## Online supplemental Technical Appendix

### Estimating intervention impact, and confidence interval estimation

Sarkadi et. al. described a method to assess the population-level impact of interventions using normal distributions to approximate the actual data. After estimating the mean and standard deviation for the normal distributions before and after intervention, the “health gain” is defined as the area between the two distribution curves on the right side, where the distribution density after intervention is lower (the shaded area in supplemental Figure 1 below).

### Online supplemental Figure 1. Normal distribution curves.

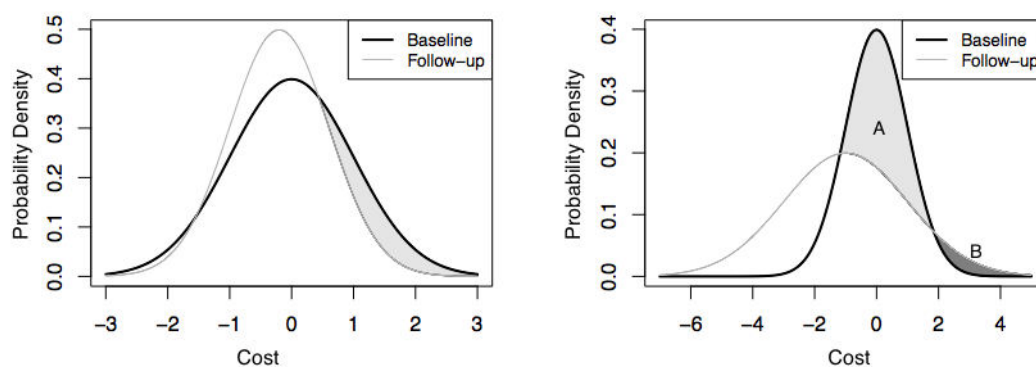

To estimate the confidence interval, Sarkadi et. al. proposed to start from estimating the confidence intervals of mean and standard deviation for the two normal distributions. The point estimation of the mean for the baseline is  $\mu_1$ , and the lower and higher bounds of the confidence interval at a certain level (for example, 95% confidence interval) are  $\mu_{1min}$  and  $\mu_{1max}$ , respectively; the estimation of standard deviation at baseline is  $\sigma_1$ , and the two bounds of confidence interval are  $\sigma_{1min}$  and  $\sigma_{1max}$ . Similarly, for the follow-up data, point estimations are  $\mu_2$  and  $\sigma_2$ , and the confidence bounds for them as  $\mu_{2min}$ ,  $\mu_{2max}$ , and  $\sigma_{2min}$ ,  $\sigma_{2max}$ . Denote the health gain as a function of the parameters for the two normal distributions as  $F(\mu_1, \sigma_1, \mu_2, \sigma_2)$ . Sarkadi et. al. get the lower and higher bounds of confidence interval for the health gain as  $\text{MIN}(F(\mu_{1min}, \sigma_{1max}, \mu_2, \sigma_2), F(\mu_1, \sigma_1, \mu_{2min}, \sigma_{2max}))$ , and  $\text{MAX}(F(\mu_{1max}, \sigma_{1min}, \mu_2, \sigma_2), F(\mu_1, \sigma_1, \mu_{2max}, \sigma_{2min}))$ .

### Modification of the impact estimation

There are a few situations where the original estimation algorithm is ambiguous.

When using real data to estimate parameters for the two normal distributions, it is unlikely that the two curves have the same standard deviation. In this case, the two curves will have to crossover points.

- (1) If the two distributions are shown as in the left graph in Supplemental Figure 1, where the density of the follow-up is always lower compared to the baseline when observed data is larger than the larger of the two crossover points, it is easy to get the health gain estimation as the shaded area.

- 1  
2  
3  
4  
5  
6  
7  
8  
9  
10  
11  
12  
13  
14  
15  
16  
17  
18  
19  
20  
21  
22  
23  
24  
25  
26  
27  
28  
29  
30  
31  
32  
33  
34  
35  
36  
37  
38  
39  
40  
41  
42  
43  
44  
45  
46  
47  
48  
49  
50  
51  
52  
53  
54  
55  
56  
57  
58  
59  
60
- (2) However, if the situation is as in the right graph in Supplemental Figure 1, where the density of follow-up is only lower compared to the baseline in the region between the two crossover points, the original method has failed to make a clear definition of the health gain. Here, we will define it as the difference of the two shaded areas A and B.
- (3) The original method only discussed the case where the estimated mean after intervention is no larger than that of the baseline. We need to define health gain estimation even though this is not true, so that we can have negative estimations when calculating confidence intervals. If the estimated mean after intervention increases, we switch the places of the two curves to estimate a positive health gain as previously, and then put a negative sign to this value and take it as the negative health gain.

For peer review only

**Online supplemental Figure 2. The health gain (impact) distribution**

The health gain (impact) was defined as percentage of people with type 2 diabetes and hospital admission having reduced inpatient payment after the 3 year integrated care at population level. Distributions of the impact were approximated by bootstrapping. Subjects and their associated inpatient payment were selected by random resampling with replacement from the original data for 10000 times, and the impact was calculated in each resampled dataset. Dashed red line shows the impact in original data. Bootstrap p value was calculated by comparing the impact estimated in the resampled data to 0 (indicated by the solid red line; null hypothesis  $H_0$ : impact  $\leq 0$ , and alternative hypothesis  $H_1$ : impact  $> 0$ ;  $P = [\text{Percentage with impact} \leq 0]$ ).

Left top: East Cambridge and Fenland, <70 years; right top: East Cambridge and Fenland,  $\geq 70$  years;  
 Left middle: Great Cambridge, <70 years; right middle: Great Cambridge,  $\geq 70$  years;  
 Left bottom: Huntingdonshire, <70 years; right bottom: Huntingdonshire,  $\geq 70$  years.

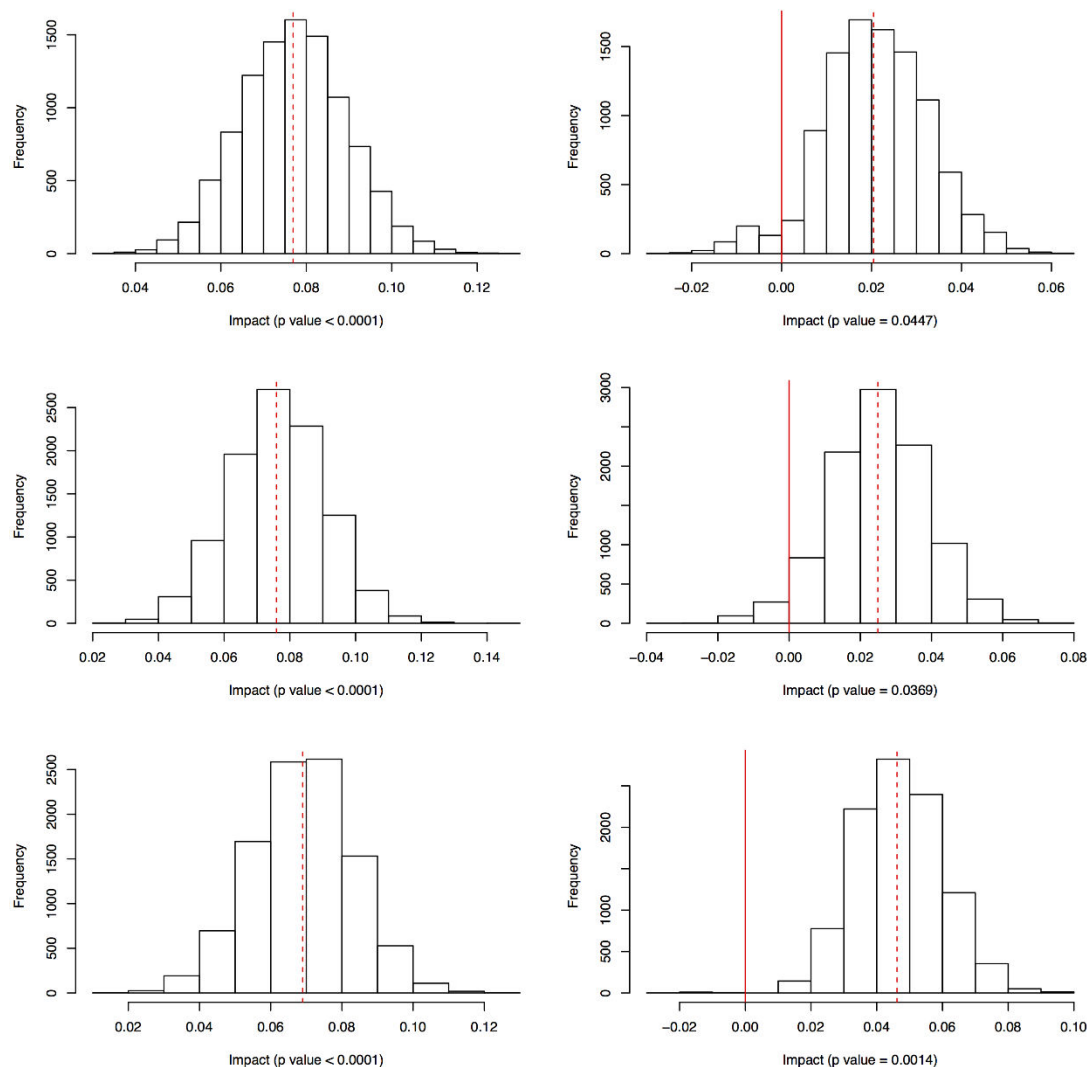

**Online supplemental Table 1. Goodness-of-fit statistics for Normal, Gamma, and log-normal distribution**

|                                          |            | Normal distribution<br>(log transformed<br>inpatient payment) | Gamma<br>distribution | Log<br>Normal<br>distribution | Normal<br>distribution |
|------------------------------------------|------------|---------------------------------------------------------------|-----------------------|-------------------------------|------------------------|
|                                          |            | AIC                                                           |                       |                               |                        |
| East Cambridge and Fenland,<br>2008-2009 | < 70 years | 4138.08                                                       | 4649.35               | 4413.18                       | 5757.95                |
|                                          | ≥70 years  | 4792.04                                                       | 5639.68               | 5494.05                       | 6648.18                |
| East Cambridge and Fenland,<br>2011-2012 | < 70 years | 5125.91                                                       | 5195.19               | 4799.82                       | 6792.39                |
|                                          | ≥70 years  | 6555.80                                                       | 7541.19               | 7287.31                       | 9014.41                |
| Huntingdonshire,<br>2008-2009            | < 70 years | 3088.09                                                       | 3592.87               | 3350.03                       | 4603.81                |
|                                          | ≥70 years  | 3063.47                                                       | 3475.19               | 3319.11                       | 4247.04                |
| Huntingdonshire,<br>2011-2012            | < 70 years | 3910.41                                                       | 4434.23               | 4070.55                       | 5843.54                |
|                                          | ≥70 years  | 4335.50                                                       | 4634.40               | 4371.58                       | 5835.11                |
| Greater Cambridge,<br>2008-2009          | < 70 years | 2987.32                                                       | 3506.21               | 3376.34                       | 4203.61                |
|                                          | ≥70 years  | 3739.02                                                       | 4733.66               | 4663.78                       | 5406.49                |
| Greater Cambridge,<br>2011-2012          | < 70 years | 3647.87                                                       | 4031.53               | 3784.87                       | 5082.50                |
|                                          | ≥70 years  | 4398.30                                                       | 5438.64               | 5317.42                       | 6307.03                |
|                                          |            | BIC                                                           |                       |                               |                        |
| East Cambridge and Fenland,<br>2008-2009 | < 70 years | 4149.13                                                       | 4660.40               | 4424.23                       | 5769.00                |
|                                          | ≥70 years  | 4803.20                                                       | 5650.85               | 5505.21                       | 6659.34                |
| East Cambridge and Fenland,<br>2011-2012 | < 70 years | 5137.38                                                       | 5206.66               | 4811.29                       | 6803.86                |
|                                          | ≥70 years  | 6567.57                                                       | 7552.96               | 7299.08                       | 9026.18                |
| Huntingdonshire,<br>2008-2009            | < 70 years | 3398.76                                                       | 3603.54               | 3360.70                       | 4614.48                |
|                                          | ≥70 years  | 3073.81                                                       | 3485.52               | 3329.44                       | 4257.37                |
| Huntingdonshire,<br>2011-2012            | < 70 years | 3921.50                                                       | 4445.39               | 4081.71                       | 5854.70                |
|                                          | ≥70 years  | 4346.46                                                       | 4645.37               | 4382.55                       | 5846.08                |
| Greater Cambridge,<br>2008-2009          | < 70 years | 2997.81                                                       | 3516.70               | 3386.83                       | 4214.09                |
|                                          | ≥70 years  | 3749.75                                                       | 4744.38               | 4674.50                       | 5417.21                |
| Greater Cambridge,<br>2011-2012          | < 70 years | 3658.76                                                       | 4042.44               | 3795.77                       | 5093.41                |
|                                          | ≥70 years  | 4409.37                                                       | 5449.71               | 5328.49                       | 6318.10                |

|                                          |            | Log likelihood |          |          |          |
|------------------------------------------|------------|----------------|----------|----------|----------|
| Overall                                  |            |                |          |          |          |
| East Cambridge and Fenland,<br>2008-2009 | < 70 years | -2067.04       | -2322.67 | -2204.59 | -2876.97 |
|                                          | ≥70 years  | -2394.02       | -2817.84 | -2745.02 | -3322.09 |
| East Cambridge and Fenland,<br>2011-2012 | < 70 years | -2560.95       | -2595.59 | -2397.91 | -3394.19 |
|                                          | ≥70 years  | -3275.90       | -3768.59 | -3641.66 | -4505.20 |
| Huntingdonshire,<br>2008-2009            | < 70 years | -1692.05       | -1794.44 | -1673.01 | -2299.90 |
|                                          | ≥70 years  | -1529.74       | -1735.59 | -1657.55 | -2121.52 |
| Huntingdonshire,<br>2011-2012            | < 70 years | -1953.21       | -2215.12 | -2033.28 | -2919.77 |
|                                          | ≥70 years  | -2165.75       | -2315.20 | -2183.79 | -2915.56 |
| Greater Cambridge,<br>2008-2009          | < 70 years | -1491.66       | -1751.11 | -1686.17 | -2099.80 |
|                                          | ≥70 years  | -1867.51       | -2364.83 | -2329.89 | -2701.24 |
| Greater Cambridge,<br>2011-2012          | < 70 years | -1821.93       | -2013.77 | -1890.43 | -2539.25 |
|                                          | ≥70 years  | -2197.15       | -2717.32 | -2656.71 | -3151.51 |

AIC, Akaike information criterion; BIC, Bayesian information criterion.

**Online supplemental Table 2. The estimated absolute 'health gain (impact)' after the intervention by age and region: estimation based on Normal-distribution**

|                            |            | Impact, % | 95% confidence interval, % | P value (bootstrapping) |
|----------------------------|------------|-----------|----------------------------|-------------------------|
| East Cambridge and Fenland | < 70 years | 1.58      | (-1.91, 4.88)              | 0.051948                |
|                            | ≥70 years  | 2.74      | (1.29, 5.81)               | 0.014985                |
| Huntingdonshire            | < 70 years | 1.83      | (-2.44, 5.87)              | 0.220779                |
|                            | ≥70 years  | -2.06     | (-5.54, 3.79)              | 0.737263                |
| Greater Cambridge          | < 70 years | 3.20      | (1.77, 7.20)               | 0.004995                |
|                            | ≥70 years  | 4.14      | (2.27, 7.86)               | 0.000999                |

The health gain (impact) was defined as percentage of people with type 2 diabetes and hospital admission having reduced inpatient payment after the integrated care at population level.

## Consolidated Health Economic Evaluation Reporting Standards – CHEERS Checklist 1

**CHEERS Checklist****Items to include when reporting economic evaluations of health interventions**

The **ISPOR CHEERS Task Force Report**, *Consolidated Health Economic Evaluation Reporting Standards (CHEERS)—Explanation and Elaboration: A Report of the ISPOR Health Economic Evaluations Publication Guidelines Good Reporting Practices Task Force*, provides examples and further discussion of the 24-item CHEERS Checklist and the CHEERS Statement. It may be accessed via the *Value in Health* or via the ISPOR Health Economic Evaluation Publication Guidelines – CHEERS: Good Reporting Practices webpage: <http://www.ispor.org/TaskForces/EconomicPubGuidelines.asp>

| Section                         | Item No | Recommendation                                                                                                                                                                          | Reported on page No/line No |
|---------------------------------|---------|-----------------------------------------------------------------------------------------------------------------------------------------------------------------------------------------|-----------------------------|
| <b>Title and Abstract</b>       |         |                                                                                                                                                                                         |                             |
| Title                           | 1       | Identify the study as an economic evaluation or use more specific terms such as “cost-effectiveness analysis”, and describe the interventions compared.                                 | Page-1                      |
| Abstract                        | 2       | Provide a structured summary of objectives, perspective, setting, methods (including study design and inputs), results (including base case and uncertainty analyses), and conclusions. | Page-2                      |
| <b>Introduction</b>             |         |                                                                                                                                                                                         |                             |
| Background and objectives       | 3       | Provide an explicit statement of the broader context for the study.<br>Present the study question and its relevance for health policy or practice decisions.                            | Page-4                      |
| <b>Methods</b>                  |         |                                                                                                                                                                                         |                             |
| Target population and subgroups | 4       | Describe characteristics of the base case population and subgroups analysed, including why they were chosen.                                                                            | Page 4-5                    |
| Setting and location            | 5       | State relevant aspects of the system(s) in which the decision(s) need(s) to be made.                                                                                                    | Page 5                      |
| Study perspective               | 6       | Describe the perspective of the study and relate this to the costs being evaluated.                                                                                                     | Page 5                      |
| Comparators                     | 7       | Describe the interventions or strategies being compared and state why they were chosen.                                                                                                 | Page 5                      |
| Time horizon                    | 8       | State the time horizon(s) over which costs and consequences are being evaluated and say why appropriate.                                                                                | Page 5                      |
| Discount rate                   | 9       | Report the choice of discount rate(s) used for costs and outcomes and say why appropriate.                                                                                              | Page 5                      |
| Choice of health outcomes       | 10      | Describe what outcomes were used as the measure(s) of benefit in the evaluation and their relevance for the type of analysis performed.                                                 | Page 5-6                    |
| Measurement of effectiveness    | 11a     | <i>Single study-based estimates</i> : Describe fully the design features of the single effectiveness study and why the single                                                           | Page 5-6                    |

## Consolidated Health Economic Evaluation Reporting Standards – CHEERS Checklist 2

|                                                        |     |                                                                                                                                                                                                                                                                                                                                                       |        |
|--------------------------------------------------------|-----|-------------------------------------------------------------------------------------------------------------------------------------------------------------------------------------------------------------------------------------------------------------------------------------------------------------------------------------------------------|--------|
|                                                        |     | study was a sufficient source of clinical effectiveness data.                                                                                                                                                                                                                                                                                         |        |
|                                                        | 11b | <i>Synthesis-based estimates</i> : Describe fully the methods used for identification of included studies and synthesis of clinical effectiveness data.                                                                                                                                                                                               |        |
| Measurement and valuation of preference based outcomes | 12  | If applicable, describe the population and methods used to elicit preferences for outcomes.                                                                                                                                                                                                                                                           | Page 6 |
| Estimating resources and costs                         | 13a | <i>Single study-based economic evaluation</i> : Describe approaches used to estimate resource use associated with the alternative interventions. Describe primary or secondary research methods for valuing each resource item in terms of its unit cost. Describe any adjustments made to approximate to opportunity costs.                          |        |
|                                                        | 13b | <i>Model-based economic evaluation</i> : Describe approaches and data sources used to estimate resource use associated with model health states. Describe primary or secondary research methods for valuing each resource item in terms of its unit cost. Describe any adjustments made to approximate to opportunity costs.                          | Page 6 |
| Currency, price date, and conversion                   | 14  | Report the dates of the estimated resource quantities and unit costs. Describe methods for adjusting estimated unit costs to the year of reported costs if necessary. Describe methods for converting costs into a common currency base and the exchange rate.                                                                                        | Page 6 |
| Choice of model                                        | 15  | Describe and give reasons for the specific type of decision-analytical model used. Providing a figure to show model structure is strongly recommended.                                                                                                                                                                                                | Page 6 |
| Assumptions                                            | 16  | Describe all structural or other assumptions underpinning the decision-analytical model.                                                                                                                                                                                                                                                              | Page 6 |
| Analytical methods                                     | 17  | Describe all analytical methods supporting the evaluation. This could include methods for dealing with skewed, missing, or censored data; extrapolation methods; methods for pooling data; approaches to validate or make adjustments (such as half cycle corrections) to a model; and methods for handling population heterogeneity and uncertainty. | Page 6 |
| <b>Results</b>                                         |     |                                                                                                                                                                                                                                                                                                                                                       |        |
| Study parameters                                       | 18  | Report the values, ranges, references, and, if used, probability distributions for all parameters. Report reasons or sources for distributions used to represent uncertainty where appropriate. Providing a table to show the input values is strongly recommended.                                                                                   | Page 7 |
| Incremental costs and outcomes                         | 19  | For each intervention, report mean values for the main categories of estimated costs and outcomes of interest, as well as mean differences between the comparator groups. If                                                                                                                                                                          | Page 7 |



## Consolidated Health Economic Evaluation Reporting Standards – CHEERS Checklist 3

|                                                                      |     |                                                                                                                                                                                                                                                                              |          |
|----------------------------------------------------------------------|-----|------------------------------------------------------------------------------------------------------------------------------------------------------------------------------------------------------------------------------------------------------------------------------|----------|
|                                                                      |     | applicable, report incremental cost-effectiveness ratios.                                                                                                                                                                                                                    |          |
| Characterizing uncertainty                                           | 20a | <i>Single study-based economic evaluation</i> : Describe the effects of sampling uncertainty for the estimated incremental cost and incremental effectiveness parameters, together with the impact of methodological assumptions (such as discount rate, study perspective). |          |
|                                                                      | 20b | <i>Model-based economic evaluation</i> : Describe the effects on the results of uncertainty for all input parameters, and uncertainty related to the structure of the model and assumptions.                                                                                 | Page 7-8 |
| Characterizing heterogeneity                                         | 21  | If applicable, report differences in costs, outcomes, or cost-effectiveness that can be explained by variations between subgroups of patients with different baseline characteristics or other observed variability in effects that are not reducible by more information.   | Page 7-8 |
| <b>Discussion</b>                                                    |     |                                                                                                                                                                                                                                                                              |          |
| Study findings, limitations, generalizability, and current knowledge | 22  | Summarise key study findings and describe how they support the conclusions reached. Discuss limitations and the generalisability of the findings and how the findings fit with current knowledge.                                                                            | Page 8   |
| <b>Other</b>                                                         |     |                                                                                                                                                                                                                                                                              |          |
| Source of funding                                                    | 23  | Describe how the study was funded and the role of the funder in the identification, design, conduct, and reporting of the analysis. Describe other non-monetary sources of support.                                                                                          | Page 13  |
| Conflicts of interest                                                | 24  | Describe any potential for conflict of interest of study contributors in accordance with journal policy. In the absence of a journal policy, we recommend authors comply with International Committee of Medical Journal Editors recommendations.                            | Page 13  |

For consistency, the CHEERS Statement checklist format is based on the format of the CONSORT statement checklist

The **ISPOR CHEERS Task Force Report** provides examples and further discussion of the 24-item CHEERS Checklist and the CHEERS Statement. It may be accessed via the *Value in Health* link or via the ISPOR Health Economic Evaluation Publication Guidelines – CHEERS: Good Reporting Practices webpage: <http://www.ispor.org/TaskForces/EconomicPubGuidelines.asp>

The citation for the CHEERS Task Force Report is:  
 Husereau D, Drummond M, Petrou S, et al. Consolidated health economic evaluation reporting standards (CHEERS)—Explanation and elaboration: A report of the ISPOR health economic evaluations publication guidelines good reporting practices task force. *Value Health* 2013;16:231-50.

# BMJ Open

## Population-level impact of diabetes integrated care on commissioner payments for inpatient care among people with type 2 diabetes in Cambridgeshire: a post-intervention cohort follow up study

|                                 |                                                                                                                                                                                                                                                                                                                                                                                                                                                                                                                                                                                                                                        |
|---------------------------------|----------------------------------------------------------------------------------------------------------------------------------------------------------------------------------------------------------------------------------------------------------------------------------------------------------------------------------------------------------------------------------------------------------------------------------------------------------------------------------------------------------------------------------------------------------------------------------------------------------------------------------------|
| Journal:                        | <i>BMJ Open</i>                                                                                                                                                                                                                                                                                                                                                                                                                                                                                                                                                                                                                        |
| Manuscript ID                   | bmjopen-2017-015816.R3                                                                                                                                                                                                                                                                                                                                                                                                                                                                                                                                                                                                                 |
| Article Type:                   | Research                                                                                                                                                                                                                                                                                                                                                                                                                                                                                                                                                                                                                               |
| Date Submitted by the Author:   | 28-Nov-2017                                                                                                                                                                                                                                                                                                                                                                                                                                                                                                                                                                                                                            |
| Complete List of Authors:       | Yu, Dahai; the First Affiliated Hospital, Zhengzhou University, Department of Nephrology; Keele University, Arthritis Research UK Primary Care Centre, Research Institute for Primary Care & Health Sciences<br>Yang, Wei; the First Affiliated Hospital, Zhengzhou University, Department of Nephrology; Washington University in St Louis, School of Medicine<br>cai, yamei; the First Affiliated Hospital, Zhengzhou University, Department of Nephrology<br>Zhao, Zhanzheng; the First Affiliated Hospital, Zhengzhou University, Department of Nephrology<br>Simmons, David; Western Sydney University, Macarthur Clinical School |
| <b>Primary Subject Heading</b>: | Diabetes and endocrinology                                                                                                                                                                                                                                                                                                                                                                                                                                                                                                                                                                                                             |
| Secondary Subject Heading:      | Research methods                                                                                                                                                                                                                                                                                                                                                                                                                                                                                                                                                                                                                       |
| Keywords:                       | intergrated care, Diabetes, Intervention studies, Area under the curve                                                                                                                                                                                                                                                                                                                                                                                                                                                                                                                                                                 |
|                                 |                                                                                                                                                                                                                                                                                                                                                                                                                                                                                                                                                                                                                                        |

SCHOLARONE™  
Manuscripts

1  
2  
3 **Title Page**

4 **Title:** Population-level impact of diabetes integrated care on commissioner payments for  
5 inpatient care among people with type 2 diabetes in Cambridgeshire: a post-intervention  
6 cohort follow up study  
7

8  
9 **Authors:** Dahai Yu <sup>1,2</sup>, Wei Yang <sup>1,3</sup>, Yamei Cai <sup>1</sup>, Zhanzheng Zhao <sup>1\*</sup>, David Simmons  
10 <sup>4\*</sup>  
11

12 1. Department of Nephrology, the First Affiliated Hospital, Zhengzhou University,  
13 Zhengzhou 450052, China  
14

15 2. Arthritis Research UK Primary Care Centre, Research Institute for Primary Care  
16 & Health Sciences, Keele University, Keele ST5 5BG, UK  
17

18 3. School of Medicine, Washington University in St Louis, 660 S Euclid Ave, St.  
19 Louis, MO 63110, United States  
20

21 4. Western Sydney University, Campbelltown, Sydney NSW 2751, Australia  
22  
23  
24

25 **\*Correspondence 1 (China):**

26 Professor Zhanzheng Zhao, Department of Nephrology, The First Affiliated  
27 Hospital  
28

29 Zhengzhou University, Zhengzhou 450052, CHINA

30 Email: [zhanzhengzhao@zzu.edu.cn](mailto:zhanzhengzhao@zzu.edu.cn)

31 TEL:+86 139 3852 5666

32 FAX:+86 371 6698 8753  
33

34 **\*Correspondence 2 (Australia):**

35 Professor David Simmons, Macarthur Clinical School, School of Medicine, Western  
36 Sydney University, Locked Bag 1797, Campbelltown NSW 2751, AUSTRALIA  
37

38 Email: [dsworkster@gmail.com](mailto:dsworkster@gmail.com)

39 TEL: (61+2) 4620 3899

40 FAX: (61+2) 4620 3890  
41  
42  
43

44 Words in the main text: 2,178

45 Words in the abstract: 222

46 Tables: 3

47 Figures: 1

48 References: 26

49 Online Appendix: 1

50  
51  
52  
53  
54  
55  
56  
57  
58  
59  
60  
Keywords: Diabetes; Integrated care; Intervention studies; Area under the curve

1  
2  
3 1 Abstract

4 2 **Objectives**

5 3 Few studies have estimated the effect of diabetes integrated care at a population level.  
6 4 We have assessed the impact of introducing a community service led diabetes integrated  
7 5 care programme on commissioner payments (tariff) for inpatient care in rural England.

8  
9  
10 6 **Methods**

11 7 The Diabetes Integrated Care Initiative (DICI) was delivered by a separate enhanced  
12 8 community diabetes service, increasing specialist nursing, dietetic, podiatry and medical  
13 9 support to primary care and patients, while linking into other diabetes specialist services.  
14 10 Commissioner data was provided by the local authority. The difference in area between  
15 11 the two overlapping distribution curves of inpatient payments at baseline and follow-up  
16 12 (at 3 years) was used to estimate the effect of integrated care on commissioner inpatient  
17 13 payments on a population level.

18  
19  
20 14 **Results**

21 15 Over the three-year period, reduced inpatient payments occurred in 2.7 (1.3 to 5.8) % of  
22 16 patients with diabetes aged more than 70 years in the Intervention area. However,  
23 17 reduced diabetes inpatient payments occurred in 3.20 (1.77 to 7.20) % of patients aged <70  
24 18 years and 4.1 (2.3 to 7.9) % of patients  $\geq$ aged more than 70 years in one of the two  
25 19 adjacent areas.

26  
27 20 **Conclusion**

28  
29 21 This enhanced community diabetes services was not associated with substantially  
30 22 reduced inpatient payments. Alternative diabetes integrated care approaches (eg with  
31 23 direct primary and secondary care collaboration rather than with a community service)  
32 24 should be tested.

33 25

34 26

35 27

36 28

37 29

38 30

39 31

40 32

41 33

42 34

43 35

44 36

45 37

46 38

47  
48  
49  
50  
51  
52  
53  
54  
55  
56  
57  
58  
59  
60

1  
2  
3  
4  
5  
6  
7  
8  
9  
10  
11  
12  
13  
14  
15  
16  
17  
18  
19  
20  
21  
22  
23  
24  
25  
26  
27  
28  
29  
30  
31  
32  
33  
34  
35  
36  
37  
38  
39  
40  
41  
42  
43  
44  
45  
46  
47  
48  
49  
50  
51  
52  
53  
54  
55  
56  
57  
58  
59  
60

**Strengths and limitations of this study**

- The ‘health gain’ in the revised method was clearly defined with a formulated algorithm of evaluation, which broadened the utilization scenarios especially when negative values were raised.
- The data used in this study depended upon the completeness of the coding for diabetes in the GP records. The impact of this potential ascertainment bias should have been steady as no systematic change in coding was known to have occurred over this time period.

## 1 Introduction

2 As the social and economic impact of diabetes grows, so does the variety of attempts to  
3 improve care quality and reduce health care costs among those affected [1, 2, 3, 4]. One  
4 approach, able to provide at least equivalent care to routine medical care with some  
5 types of patients, has been the introduction of nurses working within protocols, within  
6 medical services [5]. Other models known as ‘intermediate care’, including general  
7 practitioners with a special interest [6], and community diabetes nursing services [6]  
8 have been implemented, but without robust evaluation. As a proposed system,  
9 integrated care articulates all health workers and health systems around the needs of  
10 each patient and should be associated with improved outcomes and less cost [7].

11 However, the impact of a population based integrated care intervention is difficult to  
12 measure on an individual level. One randomised trial of an intermediate care service  
13 achieved minimal actual incremental benefit [8]. By their nature, randomised controlled  
14 trials are difficult to utilise when assessing the impact of a complete system change at a  
15 population level. . Sarkadi et al have proposed a method to look at population outcomes  
16 in their own right in the quest of understanding how interventions work at a population  
17 level [9]. Under the English National Health Service (NHS), public inpatient care is paid  
18 for from taxation through local commissioners. These payments do not generally cover  
19 the hospital costs of inpatients with diabetes [10], but can provide an NHS commissioner  
20 perspective that reflects both acuity and complexity, beyond eg length of stay. We have  
21 now used the Sarkadi approach to assess whether any changes in population based  
22 commissioner inpatient payment data occurred during a diabetes integrated care  
23 intervention by viewing the level and distribution of commissioner inpatient payments in  
24 the population as the unit of interest.

## 25 Methods

1  
2  
3 1 East Cambridgeshire and Fenland (ECF: 2009 population 160,000, diabetes population  
4  
5 2 7,790) is largely rural, with a small number of socioeconomically deprived communities  
6  
7 3 [6]. There is no local major hospital (with eg an emergency department), falling within  
8  
9 4 the catchment areas of 4 hospitals outside of the area. Some diabetes outcomes have  
10  
11 5 been historically poor [11]. A separate, local, diabetes specialist nurse (DSN) led  
12  
13 6 community service was introduced in 2003 [12]. From April 2009, this was replaced with a  
14  
15 7 new Diabetes Integrated Care Initiative (DICI) using additional finance (£250,000 pa), in  
16  
17 8 an attempt to address continuing health disparities [13]. The components of the DICI has  
18  
19 9 been described in the previous publications [14]. The health district includes two other  
20  
21 10 areas, Huntingdonshire and Greater Cambridge, which did not receive the full  
22  
23 11 intermediate team and are able to serve as 'control' areas, although each hospital based  
24  
25 12 service would have continued with its own internal service developments. We have  
26  
27 13 previously reported no impact on metabolic control or hospitalisation rates in spite of full  
28  
29 14 implementation of the service [6].  
30  
31  
32  
33 15 De-identified electronic Secondary Uses Service (SUS) data for across Cambridgeshire  
34  
35 16 were obtained for recorded inpatient tariff between April 2007 (ie 2 years before the DICI  
36  
37 17 contract commenced) and March 2012. Practice, patient age, elective/non elective status,  
38  
39 18 ICD10 and Health Related Group (HRG) coding were included in the dataset. Diabetes  
40  
41 19 was considered present if E10-E14 was in any ICD10 field and, as the primary cause of  
42  
43 20 admission if coded in the first field [15, 16]. Inpatient payments recorded in 2008-2009  
44  
45 21 were used as baseline, to compare with that recorded in 2011-2012 as the end of the  
46  
47 22 intervention period. Using the Sarkadi et. al. method, the mean and standard deviation  
48  
49 23 for normal distributions before and after the intervention can be estimated. The "health  
50  
51 24 gain" is defined as the area between the two distribution curves on the right side, where  
52  
53 25 the distribution density after intervention is lower (the shaded area in supplemental **Error!**  
54  
55 26 **Reference source not found.**Figure 4 left). In our study, 'health gain' represents the

1  
2  
3 1 proportion of patients with reduced inpatient payments between the baseline and  
4  
5 2 intervention period. The reduction in commissioner payments reflects reduced needs in  
6  
7 3 care and thus improvement in health.  
8  
9  
10 4

11  
12 5 Sarkadi's method has outlined ways to calculate the impact when the two distributions  
13  
14 6 have the same standard deviation (SD), or when the follow-up group has smaller mean  
15  
16 7 and smaller SD at the same time. However we have noticed when using real data that the  
17  
18 8 follow-up-group might have smaller mean but larger SD. To accommodate this situation,  
19  
20 9 we have modified the Sarkadi's method as described in online supplemental technical  
21  
22 10 appendix and online supplemental Figure 1. The health gain distributions are presented in  
23  
24 11 online supplemental Figure-2 to illustrate the health gains at a population level.  
25  
26  
27  
28  
29

30  
31 13 In addition to the Normal distribution originally used in Sakadi's method, three other  
32  
33 14 distributions, Gamma distribution, Log-Normal distribution and Normal distribution of  
34  
35 15 log-transferred payment data were attempted to fit the data. The goodness-of-fit  
36  
37 16 statistics, Akaike information criterion (AIC), Bayesian information criterion (BIC), and log-  
38  
39 17 likelihood were tested over four distributions and the distribution with the minimum AIC,  
40  
41 18 BIC and maximum log-likelihood was chosen as the final distribution to examine the  
42  
43 19 impact.  
44  
45

46  
47 20  
48  
49 21 Bootstrapping is used to obtain a p value for the probability of health gain larger than  
50  
51 22 zero. We randomly sampled data points with replacements from the original data  
52  
53 23 separately for the baseline and follow-up, so that we obtain bootstrapped data with the  
54  
55 24 same numbers of data points. These are used to obtain an estimation of the health gain  
56  
57  
58  
59  
60



1 after perturbation. This process is repeated 1000 times. The probability of observing  
2 estimations less than or equal to zero is calculated, and used as the approximation of the  
3 p value for testing whether health gain is significantly larger than zero.

4 No personal identifiers were released to researchers, and all subsequent analyses were  
5 conducted on anonymised datasets. Age data were provided allowing analyses to be  
6 undertaken above and below the median age (70 years) to assess any related variation.

7 The work had approval from the Cambridgeshire research ethics committee as part of a  
8 wider service evaluation and, as such, was deemed not to require personal informed  
9 consent.

10 All analyses were conducted in R [Version 3.1]. Ethics approval was received from the  
11 National Research Ethics Service Committee- East of England.

## 14 **Results**

15 The sample size of inpatient payment records during the baseline and the intervention  
16 period in each region is presented in Table 1. The inpatient payments during the baseline  
17 period and the intervention period are shown in Table 2 by area and age group. In each  
18 area and age group, a lower individual median inpatient payment was more likely to be  
19 found in the intervention period.

20 Figure-1 shows the distribution of the inpatient payments in people with type 2 diabetes  
21 in the baseline and intervention periods. This illustrates the effect of the integrated care  
22 intervention, as the left-moving curve in the intervention period indicates the potential  
23 inpatient payment saving at a population level.

1  
2  
3 1 Four distribution (Normal distribution, Gamma distribution, Log-Normal distribution and  
4  
5 2 Normal distribution of log-transformed payment data) were attempted to fit the  
6  
7 3 payment data as presented in Supplemental Table 1. The Normal distribution of log-  
8  
9 4 transformed payment data was chosen to estimate the impact on the intervention for its  
10  
11 5 minimum AIC and BIC and its maximum log-likelihood.

12  
13  
14 6 The magnitude of the intervention at the population level is presented in Table-3.  
15  
16 7 Significant 'health gain' was observed both in the intervention area and control areas,  
17  
18 8 especially among patients aged less than 70 years. In the intervention area, East  
19  
20 9 Cambridge and Fenland, 7.69% (95 Confidence Interval (CI) 5.89-9.74%) and 2.05% (0.72 to  
21  
22 10 4.13%) of patients aged less than 70 years and aged more than 70 years, respectively had a  
23  
24 11 reduced inpatient payment, compared with the population in the baseline period. In  
25  
26 12 Huntingdonshire, the 'health gain' was 6.90% (5.63 to 8.68%) and 4.62% (2.22 to 7.23%)  
27  
28 13 among patients aged less than 70 years and patients aged more than 70 years,  
29  
30 14 respectively. In Greater Cambridge, the 'health gain' was 7.59% (5.63 to 9.94%) and 2.49%  
31  
32 15 (1.46 to 4.58%) among patients aged less than 70 years and patients aged more than 70  
33  
34 16 years, respectively.

35  
36  
37  
38 17 To allow comparisons, the estimated impact, based on a Normal distribution, is presented  
39  
40 18 in Supplemental Table 2. In the intervention area, East Cambridge and Fenland, 2.74%  
41  
42 19 (1.29 to 5.81%) of patients aged more than 70 years had a reduced inpatient payment,  
43  
44 20 compared with the population in the baseline period. In one of the control areas, Greater  
45  
46 21 Cambridge, 'health gain' was also observed in 3.20 (1.77 to 7.20) % of patients aged less  
47  
48 22 than 70 years and 4.14 (2.27 to 7.86) % patients aged more than 70 years, respectively.  
49  
50 23 Significant 'health gain' was not identified within the population in Huntingdonshire over  
51  
52 24 the study period.

53  
54  
55 25

1

2 **Discussion**

3

4 We have used a novel way, calculating the total health gain (proportion of people with  
5 reduced inpatient payments) assuming a Gaussian distribution, to assess the results of  
6 integrated care in the diabetic population of areas in Cambridgeshire through a  
7 population lens. The study revealed a possible effect of the new integrated care  
8 approach on inpatient payments, as 7.7% of patients aged less than 70 years and 2.1% of  
9 patients aged more than 70 years had reduced inpatient payments in the intervention  
10 area, East Cambridge and Fenland. However, reductions were also seen in the control  
11 areas, in Huntingdonshire, 6.9% of patients aged less than 70 years and 4.6 % of patients  
12 aged less than 70years had reduced inpatient payment; in Greater Cambridge, 7.6% of  
13 patients aged less than 70 years and 2.5 % of patients aged less than 70years had reduced  
14 inpatient. The 95% confidence intervals overlapped across the 3 areas, so we have not  
15 shown any differences between the areas.

16

17 Significant improvements in diabetes care can occur with multifaceted interventions [17]  
18 including disease management in the US [18] and integrated care in Germany [19] and  
19 these can be associated with reductions in hospital costs [20]. The integrated care  
20 intervention was successfully implemented across the area, with positive patient  
21 experience, improved practice nurse clinical confidence, and early reports of clinical  
22 benefit [13, 14, 21]. It is therefore surprising that although some (small) positive benefit  
23 was observed in the intervention area, the return on the investment of GBP250,000 was  
24 not greater and possibly less than in one of the control areas. Elsewhere, diabetes  
25 integrated care interventions have generally been more effective within single providers

1  
2  
3 1 or in contexts where multiple primary care organisations work with a single specialist  
4  
5 2 provider under an integrated insurance scheme [6]. The integrated care intervention  
6  
7 3 carried out in ECF followed a nurse led service with one of the goals reducing referrals (ie  
8  
9 4 payments) to hospital outpatients. This philosophy, rather than progressing to truly  
10  
11 5 integrated services carried through the intervention period, albeit as part of a wider  
12  
13 6 programme that included ‘vertical integration’ developments. It was perhaps to be  
14  
15 7 expected that attempts at creating such greater ‘vertical’ integration in information  
16  
17 8 management, clinical governance, budget and overall management were agreed but not  
18  
19 9 implemented, actions more achievable within a single organization. There was an  
20  
21 10 attempt to create a single equal partner network model [22] nearing the end of the  
22  
23 11 intervention period, but this as not funded by the local commissioners.

24  
25  
26 12 The failure to implement integrated information management, almost certainly  
27  
28 13 contributed to communication and integration difficulties. Most integrated care  
29  
30 14 initiatives attempt to include data sharing [23] and this was not possible within the local  
31  
32 15 information governance arrangements. This was noticed by the patients and was a  
33  
34 16 source of frustration. Interestingly, integration was perceived as happening when there  
35  
36 17 was one person ‘fronting up’ for all those involved. Case management has been proposed  
37  
38 18 as one approach to integration, and requires the case manager to corral and coordinate  
39  
40 19 the services for a given individual [18].

41  
42  
43  
44 20 Whether our findings are due to a unique set of circumstances, or expected as part of a 3  
45  
46 21 compartment model (primary care, intermediate care, and secondary care) is unclear, but  
47  
48 22 there are indications that the circumstances are not special. There are calls for more  
49  
50 23 integration and less fragmentation in health care [23], yet the evidence on what works in  
51  
52 24 England is limited [24, 25]. The latest changes in commissioning in the English NHS, with  
53  
54 25 emphasis on the need to consider ‘Any qualified Provider’ in service delivery, and

1  
2  
3 1 associated market procurement approaches, could well impair the quality of diabetes  
4  
5 2 care while increasing overall cost, if the experience here is reproduced elsewhere.  
6  
7 3 Similarly, as a 'natural experiment', it was not possible to measure the impact of  
8  
9 4 integrated care on inpatient payments at an individual level. Instead, we estimated the  
10  
11 5 proportion of the population showing 'health gain' (reduced inpatient payments) from  
12  
13 6 the integrated care intervention by using the distribution curve of inpatient payment.  
14  
15 7 Although the method was within the conceptual framework proposed by Sakardi, some  
16  
17 8 modifications to the methodology were made to overcome methodological drawbacks,  
18  
19 9 for example requiring the same standard deviation for two Gaussian curves: something  
20  
21 10 unlikely to occur in real scenarios. We believe this revised method would be more  
22  
23 11 applicable to evaluate the 'health gain' for interventions at a population level.  
24  
25  
26  
27 12 There are limitations to our study. This was not a randomised trials, so any changes could  
28  
29 13 be due to secular trends, although we do compare with the two other areas in  
30  
31 14 Cambridgeshire. The data depended on the completeness of the coding of diabetes, and  
32  
33 15 there being no systematic change in coding over this time period. We found that at least  
34  
35 16 one provider had high diabetes ascertainment [10]. Data access restrictions prevented  
36  
37 17 adjustment for some important co-variables. As the data used was record- rather than  
38  
39 18 individual based, repeat inpatient records were unable to be linked, however, the record-  
40  
41 19 based data still provides a range of plausible estimations. Moreover, within a relatively  
42  
43 20 fixed diabetes population served by a local 'closed' inpatient care and tariff system, the  
44  
45 21 likelihood for patients having a second hospital admission, would still be relatively low  
46  
47 22 (although higher than those without diabetes) [10]. In other words, inpatient payments  
48  
49 23 at two time-points are considered completely independent of each other. We  
50  
51 24 acknowledge that this current analysis still yields findings subject to confounding bias  
52  
53 25 unable to be measured in this study. The 'impact' observed in our study may therefore  
54  
55  
56  
57  
58  
59  
60

1  
2  
3 1 only reflect measured changes in the DICI and ‘control’ regions respectively, rather than  
4  
5 2 due to the DICI itself, as the DICI care model was not randomly assigned. As a result of  
6  
7 3 data access restrictions, it is not possible in this study to identify those with multiple  
8  
9 4 admissions (and payments) that would provide ‘redundant information’. The application  
10  
11 5 of bootstrapping ignoring such redundant information might lead to a mis-application of  
12  
13 6 Sarkadi’s tool and might inadvertently increase the false positive rate: something to be  
14  
15 7 taken into consideration when interpreting the findings in this study. There might be  
16  
17 8 other potential unidentified confounders in this study and evaluation seeking other  
18  
19 9 confounding factors would be possible in future studies with more variables in the  
20  
21 10 dataset including a way to identify those confounders.  
22  
23  
24  
25  
26

27 12 In conclusion, we have applied a modified novel strategy to measure ‘health gain’  
28  
29 13 associated with an integrated care intervention at a population level. We found that  
30  
31 14 there were no differences in inpatient payments. Our findings suggest that irrespective of  
32  
33 15 the ideal principles behind integration, linking multiple health providers to deliver  
34  
35 16 population based diabetes care is complex and improvements in health outcomes remain  
36  
37 17 difficult to achieve.  
38  
39  
40  
41  
42

## 43 19 **References**

- 44  
45  
46 20 1. Kar P. The ‘super six’ for the acute trust; all else under primary care? *Practical diabetes*  
47 21 2011;28: 308-309  
48 22 2. Nagi D, Wilson J. Integrated diabetes care: the Wakefield diabetes service redesign.  
49 23 *Practical diabetes* 2011;28: 310-311  
50 24 3. Rea RD, Gregory S, Browne M, Iqbal M, Holloway S, Munir M, Rose H, Gray T, Prescott D,  
51 25 Jarvis S, DiStefano G, Tan GD. Integrated diabetes care in Derby: new NHS organisations  
52 26 for new NHS challenges. *Practical diabetes* 2011;28: 312-313  
53 27 4. Kanavos, Panos and van den Aardweg, Stacey and Schurer, Willemien (2012) Diabetes  
54 28 expenditure, burden of disease and management in 5 EU countries. The London School of  
55 29 Economics and Political Science, London, UK.  
56 30

- 1
  - 2
  - 3
  - 4
  - 5
  - 6
  - 7
  - 8
  - 9
  - 10
  - 11
  - 12
  - 13
  - 14
  - 15
  - 16
  - 17
  - 18
  - 19
  - 20
  - 21
  - 22
  - 23
  - 24
  - 25
  - 26
  - 27
  - 28
  - 29
  - 30
  - 31
  - 32
  - 33
  - 34
  - 35
  - 36
  - 37
  - 38
  - 39
  - 40
  - 41
  - 42
  - 43
  - 44
  - 45
  - 46
  - 47
  - 48
  - 49
  - 50
  - 51
  - 52
  - 53
  - 54
  - 55
5. Arts EEA, Landewe-Cleuren SANT, Schaper NC, Vrijhoef HJM. The cost-effectiveness of substituting physicians with diabetes nurse specialists: a randomized controlled trial with 2-year follow-up. *Journal of Advanced Nursing* 2012; 68: 1224–1234
  6. Simmons D, Yu D, Bunn C, Cohn S, Wenzel H, Prevost T. Hospitalisation among patients with diabetes associated with a Diabetes Integrated Care Initiative: a mixed methods case study. *Future Hosp J.* 2015; 2(2): 92-98.
  7. Wenzel H, Simmons D. Chapter-1: An introduction to integrated care and diabetes integrated care. *Integrated Diabetes Care: A Multidisciplinary Approach.* Springer (2016).
  8. Wilson A, O'Hare JP, Hardy A, Raymond N, Szczepura A, Crossman R, Baines D, Khunti K, Kumar S, Saravanan P; ICCD trial group. Evaluation of the clinical and cost effectiveness of intermediate care clinics for diabetes (ICCD): a multicentre cluster randomised controlled trial. *PLoS One.* 2014;9(4):e93964.
  9. Sarkadi A, Sampaio F, Kelly MP, Feldman I. A novel approach used outcome distribution curves to estimate the population-level impact of a public health intervention. *J Clin Epidemiol* 2014; 67: 785-92
  10. Simmons D, Wenzel H. Diabetes inpatients: a case of lose, lose, lose. Is it time to use a 'diabetes-attributable hospitalization cost' to assess the impact of diabetes? *Diabet Med.* 2011;28(9):1123-30.
  11. Simmons D, Yu D, Wenzel H. Changes in hospital admissions and inpatient tariff associated with a Diabetes Integrated Care Initiative: preliminary findings. *J Diabetes* 2014; 6: 81-9
  12. Hollern H, Lunn J. Development of a primary care specialist diabetes nursing service. *J Diabetes Nursing* 2004; 8:344-348
  13. Simmons D, Yu D, Wenzel H. Changes in hospital admissions and inpatient tariff associated with a Diabetes Integrated Care Initiative: preliminary findings. *J Diabetes* 2014; 6: 81-9
  14. Harwood E, Bunn C, Caton C, Simmons D. Addressing barriers to diabetes care and self-care in general practice: A new framework for practice nurses. *J Diab Nursing* 2013; 17: 186–91
  15. Park SK, Wang W. Ambient Air Pollution and Type 2 Diabetes: A Systematic Review of Epidemiologic Research. *Curr Environ Health Rep.* 2014;1(3):275-286.
  16. Wild SH, McKnight JA, McConnachie A, Lindsay RS; Glasgow and Lothian Diabetes Register Data Group. Socioeconomic status and diabetes-related hospital admissions: a cross-sectional study of people with diagnosed diabetes. *J Epidemiol Community Health.* 2010;64(11):1022-4
  17. Renders CM, Valk GD, Griffin SJ, Wagner EH, Eijk Van JT. Interventions to Improve the Management of Diabetes in Primary Care, Outpatient, and Community Settings: A systematic review. *Diabetes Care* 2001;24:1821–1833
  18. Norris SL, Nichols PJ, Caspersen CJ, Glasgow, RE, Engelgau MM, Jack Jr L, Isham G, Snyder SR, Carande-Kulis VG, Garfield S, Briss P, McCulloch D. The Effectiveness of Disease and Case Management for People with Diabetes: A Systematic Review. *Am J Prev Med* 2002; 22: 15–38
  19. Rothe U, Muller G, Schwartz PEH, Seifert M, Kunath H, Koch R, Bergmann S, Julius U, Bornstein SR, Hanefeld M, Schulze J. Evaluation of a Diabetes Management System Based on Practice Guidelines, Integrated Care, and Continuous Quality Management in a Federal State of Germany: A population-based approach to health care research. *Diabetes Care* 2002; 25:684–689
  20. Sidorov J, Shull R. Tomcavage J, Girolami S, Lawton N, Harris R. Does Diabetes Disease Management Save Money and Improve Outcomes? *Diabetes Care* 2002; 25:684–68
  21. Hollern H, Simmons D. Cost saving and improved glycaemic control in an integrated diabetes service. *Primary Care Diabetes* 2011;13:176-181
  22. Simmons D, Wenzel H, Zgibor JC. Chapter-15: Diabetes integrated care: are we there yet? *Integrated Diabetes Care: A Multidisciplinary Approach.* Springer (2016).
  23. Ham C, Walsh N. Making integrated care happen at scale and pace. *Kings Fund, London* 2013.
  24. Ham C, Curry N. Integrated care: What is it? Does it work? What does it mean for the NHS? *Kings fund, London* 2011

- 1  
2  
3 1 25. RAND Europe, Ernst & Young LLP. National Evaluation of the Department of Health's  
4 2 Integrated Care Pilots: final report:full version. RAND Europe, Ernst & Young LLP London  
5 3 2012  
6 4

7  
8  
9 5

10  
11 6 **Acknowledgements**  
12

13  
14 7 The views expressed are those of the authors and not necessarily those of the NHS, the  
15 8 NIHR or the Department of Health.

16  
17 9 **Contributors**  
18

19 10 D.Y. analysed the data and drafted the manuscript; W.Y. revised the statistical methods  
20 11 and revised the manuscript; Y.C. validated the method and re-analysed the data  
21 12 independently; Z.Z. designed the analysis framework and revised manuscript; D.S.  
22 13 designed the study, revised the analysis framework, revised the manuscript and  
23 14 interpreted the findings.

24  
25 15 **Funding**  
26

27  
28 16 This paper presents independent research funded by the National Institute for Health  
29 17 Research (NIHR) under its Research for Patient Benefit (RfPB) Programme (Grant  
30 18 Reference Number PB-PG-0808-17303).

31  
32 19 **Competing interests**  
33

34 20 None declared.

35  
36 21 **Ethics approval**  
37

38  
39 22 No personal identifiers were released to researchers, and all subsequent analyses were  
40 23 conducted on anonymised datasets. The work had approval from the Cambridgeshire  
41 24 research ethics committee as part of a wider service evaluation and, as such, was deemed  
42 25 not to require personal informed consent.

43  
44 26 **Provenance and peer review**  
45

46 27 Not commissioned; externally peer reviewed.

47  
48 28 **Data sharing statement**  
49

50  
51 29 No additional data are available.  
52  
53  
54  
55  
56  
57  
58  
59  
60



1  
2  
3 **1 Figure 1. Using the normal (Gaussian) curve to demonstrate the distribution of inpatient payment**  
4 **2 in people with type 2 diabetes and possible effects of an integrated care on the curve.**

5  
6 3  
7 4 *The differences between the respective areas under the curve are shaded. Health gains for*  
8 5 *participants with lower inpatient payment.*  
9 6 *Left top: East Cambridge and Fenland, <70 years; right top: East Cambridge and Fenland, ≥70 years;*  
10 7 *Left middle: Great Cambridge, <70 years; right middle: Great Cambridge, ≥70 years;*  
11 8 *Left bottom: Huntingdonshire, <70 years; right bottom: Huntingdonshire, ≥70 years.*  
12 9

13 10  
14 11  
15 12  
16 13  
17 14  
18 15  
19 16  
20  
21  
22  
23  
24  
25  
26  
27  
28  
29  
30  
31  
32  
33  
34  
35  
36  
37  
38  
39  
40  
41  
42  
43  
44  
45  
46  
47  
48  
49  
50  
51  
52  
53  
54  
55  
56  
57  
58  
59  
60

For peer review only

**Table 1: Sample size of the inpatient payment records**

|                  | East Cambridge and Fenland |           | Huntingdonshire |           | Great Cambridge |           |
|------------------|----------------------------|-----------|-----------------|-----------|-----------------|-----------|
|                  | <70 years                  | ≥70 years | <70 years       | ≥70 years | <70 years       | ≥70 years |
| <b>2008-2009</b> | 2012                       | 2028      | 1494            | 1664      | 1575            | 1329      |
| <b>2011-2012</b> | 2431                       | 2756      | 1871            | 1990      | 2004            | 1823      |

**Table 2. Distribution of age and inpatient payment among people with type 2 diabetes by region and year**

|                  |                             | East Cambridge and Fenland |                 | Huntingdonshire |                 | Great Cambridge |                  |
|------------------|-----------------------------|----------------------------|-----------------|-----------------|-----------------|-----------------|------------------|
|                  |                             | <70 years                  | ≥70 years       | <70 years       | ≥70 years       | <70 years       | ≥70 years        |
| <b>2008-2009</b> | <b>Age, year</b>            | 60 (51, 65)                | 78 (74, 82)     | 61 (52, 65)     | 77 (73, 83)     | 58 (48, 64)     | 78 (74, 82)      |
|                  | <b>Inpatient payment, £</b> | 819 (506, 1860)            | 911 (531, 2473) | 808 (504, 1707) | 808 (531, 2251) | 933 (597, 1997) | 1151 (611, 2638) |
| <b>2011-2012</b> | <b>Age, year</b>            | 60 (51, 65)                | 78 (74, 83)     | 60 (48, 66)     | 77 (73, 83)     | 59 (50, 66)     | 79 (75, 84)      |
|                  | <b>Inpatient payment, £</b> | 683 (468, 1635)            | 823 (498, 2475) | 677 (502, 1666) | 808 (469, 2220) | 781 (505, 1688) | 1031 (611, 2508) |

The median (inter-quartile range (IQR)) was presented both for age and inpatient payment.

**Table 3. The estimated absolute 'health gain (impact)' after the intervention by age and region: estimation based on Normal distribution of log transferred inpatient payment data**

|                            |            | Impact, % | 95% confidence interval, % | P value (bootstrapping) |
|----------------------------|------------|-----------|----------------------------|-------------------------|
| East Cambridge and Fenland | < 70 years | 7.69      | 5.89, 9.74)                | 0                       |
|                            | ≥70 years  | 2.05      | (0.72, 4.13)               | 0.044796                |

1  
2  
3  
4  
5  
6  
7  
8  
9  
10  
11  
12  
13  
14  
15  
16  
17  
18  
19  
20  
21  
22  
23  
24  
25  
26  
27  
28  
29  
30  
31  
32  
33  
34  
35  
36  
37  
38  
39  
40  
41  
42  
43  
44  
45  
46  
47

|                   |            |      |              |          |
|-------------------|------------|------|--------------|----------|
| Huntingdonshire   | < 70 years | 6.90 | (5.63, 8.68) | 0        |
|                   | ≥70 years  | 4.62 | (2.22, 7.23) | 0.001300 |
| Greater Cambridge | < 70 years | 7.59 | (5.63, 9.94) | 0        |
|                   | ≥70 years  | 2.49 | (1.46, 4.58) | 0.037096 |

The health gain (impact) was defined as percentage of people with type 2 diabetes and hospital admission having reduced inpatient payment after the integrated care at population level.

For peer review only



152x152mm (300 x 300 DPI)



**Title:** Population-level impact of diabetes integrated care on payments for inpatient care among people with type 2 diabetes in Cambridgeshire

**Authors:** Dahai Yu <sup>1,2</sup>, Wei Yang <sup>1,3</sup>, Yamei Cai <sup>1</sup>, Zhanzheng Zhao <sup>1\*</sup>, David Simmons <sup>4\*</sup>

1. Department of Nephrology, the First Affiliated Hospital, Zhengzhou University, Zhengzhou 450052, China

2. Arthritis Research UK Primary Care Centre, Research Institute for Primary Care & Health Sciences, Keele University, Keele ST5 5BG, UK

3. School of Medicine, Washington University in St Louis, 660 S Euclid Ave, St. Louis, MO 63110, United States

4. Western Sydney University, Campbelltown, Sydney NSW 2751, Australia

**\*Correspondence 1 (China):**

Professor Zhanzheng Zhao, Department of Nephrology, The First Affiliated Hospital

Zhengzhou University, Zhengzhou 450052, CHINA

Email: [zhanzhengzhao@zzu.edu.cn](mailto:zhanzhengzhao@zzu.edu.cn)

TEL:+86 139 3852 5666

FAX:+86 371 6698 8753

**\*Correspondence 2 (Australia):**

Professor David Simmons, Macarthur Clinical School, School of Medicine, Western Sydney University, Locked Bag 1797, Campbelltown NSW 2751, AUSTRALIA

Email: [dsworkster@gmail.com](mailto:dsworkster@gmail.com)

TEL: (61+2) 4620 3899

FAX: (61+2) 4620 3890

## Online supplemental Technical Appendix

### Estimating intervention impact, and confidence interval estimation

Sarkadi et. al. described a method to assess the population-level impact of interventions using normal distributions to approximate the actual data. After estimating the mean and standard deviation for the normal distributions before and after intervention, the “health gain” is defined as the area between the two distribution curves on the right side, where the distribution density after intervention is lower (the shaded area in supplemental Figure 1 below).

### Online supplemental Figure 1. Normal distribution curves.



To estimate the confidence interval, Sarkadi et. al. proposed to start from estimating the confidence intervals of mean and standard deviation for the two normal distributions. The point estimation of the mean for the baseline is  $\mu_1$ , and the lower and higher bounds of the confidence interval at a certain level (for example, 95% confidence interval) are  $\mu_{1min}$  and  $\mu_{1max}$ , respectively; the estimation of standard deviation at baseline is  $\sigma_1$ , and the two bounds of confidence interval are  $\sigma_{1min}$  and  $\sigma_{1max}$ . Similarly, for the follow-up data, point estimations are  $\mu_2$  and  $\sigma_2$ , and the confidence bounds for them as  $\mu_{2min}$ ,  $\mu_{2max}$ , and  $\sigma_{2min}$ ,  $\sigma_{2max}$ . Denote the health gain as a function of the parameters for the two normal distributions as  $F(\mu_1, \sigma_1, \mu_2, \sigma_2)$ . Sarkadi et. al. get the lower and higher bounds of confidence interval for the health gain as  $\text{MIN}(F(\mu_{1min}, \sigma_{1max}, \mu_2, \sigma_2), F(\mu_1, \sigma_1, \mu_{2min}, \sigma_{2max}))$ , and  $\text{MAX}(F(\mu_{1max}, \sigma_{1min}, \mu_2, \sigma_2), F(\mu_1, \sigma_1, \mu_{2max}, \sigma_{2min}))$ .

### Modification of the impact estimation

There are a few situations where the original estimation algorithm is ambiguous.

When using real data to estimate parameters for the two normal distributions, it is unlikely that the two curves have the same standard deviation. In this case, the two curves will have to crossover points.

- (1) If the two distributions are shown as in the left graph in Supplemental Figure 1, where the density of the follow-up is always lower compared to the baseline when observed data is larger than the larger of the two crossover points, it is easy to get the health gain estimation as the shaded area.

- 1  
2  
3  
4  
5  
6  
7  
8  
9  
10  
11  
12  
13  
14  
15  
16  
17  
18  
19  
20  
21  
22  
23  
24  
25  
26  
27  
28  
29  
30  
31  
32  
33  
34  
35  
36  
37  
38  
39  
40  
41  
42  
43  
44  
45  
46  
47  
48  
49  
50  
51  
52  
53  
54  
55  
56  
57  
58  
59  
60
- (2) However, if the situation is as in the right graph in Supplemental Figure 1, where the density of follow-up is only lower compared to the baseline in the region between the two crossover points, the original method has failed to make a clear definition of the health gain. Here, we will define it as the difference of the two shaded areas A and B.
- (3) The original method only discussed the case where the estimated mean after intervention is no larger than that of the baseline. We need to define health gain estimation even though this is not true, so that we can have negative estimations when calculating confidence intervals. If the estimated mean after intervention increases, we switch the places of the two curves to estimate a positive health gain as previously, and then put a negative sign to this value and take it as the negative health gain.

For peer review only

**Online supplemental Figure 2. The health gain (impact) distribution**

The health gain (impact) was defined as percentage of people with type 2 diabetes and hospital admission having reduced inpatient payment after the 3 year integrated care at population level. Distributions of the impact were approximated by bootstrapping. Subjects and their associated inpatient payment were selected by random resampling with replacement from the original data for 10000 times, and the impact was calculated in each resampled dataset. Dashed red line shows the impact in original data. Bootstrap p value was calculated by comparing the impact estimated in the resampled data to 0 (indicated by the solid red line; null hypothesis  $H_0$ : impact  $\leq 0$ , and alternative hypothesis  $H_1$ : impact  $> 0$ ;  $P = [\text{Percentage with impact} \leq 0]$ ).

Left top: East Cambridge and Fenland, <70 years; right top: East Cambridge and Fenland,  $\geq 70$  years;  
 Left middle: Great Cambridge, <70 years; right middle: Great Cambridge,  $\geq 70$  years;  
 Left bottom: Huntingdonshire, <70 years; right bottom: Huntingdonshire,  $\geq 70$  years.





**Online supplemental Table 1. Goodness-of-fit statistics for Normal, Gamma, and log-normal distribution**

|                                          |            | Normal distribution<br>(log transformed<br>inpatient payment) | Gamma<br>distribution | Log<br>Normal<br>distribution | Normal<br>distribution |
|------------------------------------------|------------|---------------------------------------------------------------|-----------------------|-------------------------------|------------------------|
|                                          |            | AIC                                                           |                       |                               |                        |
| East Cambridge and Fenland,<br>2008-2009 | < 70 years | 4138.08                                                       | 4649.35               | 4413.18                       | 5757.95                |
|                                          | ≥70 years  | 4792.04                                                       | 5639.68               | 5494.05                       | 6648.18                |
| East Cambridge and Fenland,<br>2011-2012 | < 70 years | 5125.91                                                       | 5195.19               | 4799.82                       | 6792.39                |
|                                          | ≥70 years  | 6555.80                                                       | 7541.19               | 7287.31                       | 9014.41                |
| Huntingdonshire,<br>2008-2009            | < 70 years | 3088.09                                                       | 3592.87               | 3350.03                       | 4603.81                |
|                                          | ≥70 years  | 3063.47                                                       | 3475.19               | 3319.11                       | 4247.04                |
| Huntingdonshire,<br>2011-2012            | < 70 years | 3910.41                                                       | 4434.23               | 4070.55                       | 5843.54                |
|                                          | ≥70 years  | 4335.50                                                       | 4634.40               | 4371.58                       | 5835.11                |
| Greater Cambridge,<br>2008-2009          | < 70 years | 2987.32                                                       | 3506.21               | 3376.34                       | 4203.61                |
|                                          | ≥70 years  | 3739.02                                                       | 4733.66               | 4663.78                       | 5406.49                |
| Greater Cambridge,<br>2011-2012          | < 70 years | 3647.87                                                       | 4031.53               | 3784.87                       | 5082.50                |
|                                          | ≥70 years  | 4398.30                                                       | 5438.64               | 5317.42                       | 6307.03                |
|                                          |            | BIC                                                           |                       |                               |                        |
| East Cambridge and Fenland,<br>2008-2009 | < 70 years | 4149.13                                                       | 4660.40               | 4424.23                       | 5769.00                |
|                                          | ≥70 years  | 4803.20                                                       | 5650.85               | 5505.21                       | 6659.34                |
| East Cambridge and Fenland,<br>2011-2012 | < 70 years | 5137.38                                                       | 5206.66               | 4811.29                       | 6803.86                |
|                                          | ≥70 years  | 6567.57                                                       | 7552.96               | 7299.08                       | 9026.18                |
| Huntingdonshire,<br>2008-2009            | < 70 years | 3398.76                                                       | 3603.54               | 3360.70                       | 4614.48                |
|                                          | ≥70 years  | 3073.81                                                       | 3485.52               | 3329.44                       | 4257.37                |
| Huntingdonshire,<br>2011-2012            | < 70 years | 3921.50                                                       | 4445.39               | 4081.71                       | 5854.70                |
|                                          | ≥70 years  | 4346.46                                                       | 4645.37               | 4382.55                       | 5846.08                |
| Greater Cambridge,<br>2008-2009          | < 70 years | 2997.81                                                       | 3516.70               | 3386.83                       | 4214.09                |
|                                          | ≥70 years  | 3749.75                                                       | 4744.38               | 4674.50                       | 5417.21                |
| Greater Cambridge,<br>2011-2012          | < 70 years | 3658.76                                                       | 4042.44               | 3795.77                       | 5093.41                |
|                                          | ≥70 years  | 4409.37                                                       | 5449.71               | 5328.49                       | 6318.10                |

|                                          |            | Log likelihood |          |          |          |
|------------------------------------------|------------|----------------|----------|----------|----------|
| Overall                                  |            |                |          |          |          |
| East Cambridge and Fenland,<br>2008-2009 | < 70 years | -2067.04       | -2322.67 | -2204.59 | -2876.97 |
|                                          | ≥70 years  | -2394.02       | -2817.84 | -2745.02 | -3322.09 |
| East Cambridge and Fenland,<br>2011-2012 | < 70 years | -2560.95       | -2595.59 | -2397.91 | -3394.19 |
|                                          | ≥70 years  | -3275.90       | -3768.59 | -3641.66 | -4505.20 |
| Huntingdonshire,<br>2008-2009            | < 70 years | -1692.05       | -1794.44 | -1673.01 | -2299.90 |
|                                          | ≥70 years  | -1529.74       | -1735.59 | -1657.55 | -2121.52 |
| Huntingdonshire,<br>2011-2012            | < 70 years | -1953.21       | -2215.12 | -2033.28 | -2919.77 |
|                                          | ≥70 years  | -2165.75       | -2315.20 | -2183.79 | -2915.56 |
| Greater Cambridge,<br>2008-2009          | < 70 years | -1491.66       | -1751.11 | -1686.17 | -2099.80 |
|                                          | ≥70 years  | -1867.51       | -2364.83 | -2329.89 | -2701.24 |
| Greater Cambridge,<br>2011-2012          | < 70 years | -1821.93       | -2013.77 | -1890.43 | -2539.25 |
|                                          | ≥70 years  | -2197.15       | -2717.32 | -2656.71 | -3151.51 |

AIC, Akaike information criterion; BIC, Bayesian information criterion.

**Online supplemental Table 2. The estimated absolute 'health gain (impact)' after the intervention by age and region: estimation based on Normal-distribution**

|                            |            | Impact, % | 95% confidence interval, % | P value (bootstrapping) |
|----------------------------|------------|-----------|----------------------------|-------------------------|
| East Cambridge and Fenland | < 70 years | 1.58      | (-1.91, 4.88)              | 0.051948                |
|                            | ≥70 years  | 2.74      | (1.29, 5.81)               | 0.014985                |
| Huntingdonshire            | < 70 years | 1.83      | (-2.44, 5.87)              | 0.220779                |
|                            | ≥70 years  | -2.06     | (-5.54, 3.79)              | 0.737263                |
| Greater Cambridge          | < 70 years | 3.20      | (1.77, 7.20)               | 0.004995                |
|                            | ≥70 years  | 4.14      | (2.27, 7.86)               | 0.000999                |

The health gain (impact) was defined as percentage of people with type 2 diabetes and hospital admission having reduced inpatient payment after the integrated care at population level.

## Consolidated Health Economic Evaluation Reporting Standards – CHEERS Checklist 1

**CHEERS Checklist****Items to include when reporting economic evaluations of health interventions**

The **ISPOR CHEERS Task Force Report**, *Consolidated Health Economic Evaluation Reporting Standards (CHEERS)—Explanation and Elaboration: A Report of the ISPOR Health Economic Evaluations Publication Guidelines Good Reporting Practices Task Force*, provides examples and further discussion of the 24-item CHEERS Checklist and the CHEERS Statement. It may be accessed via the *Value in Health* or via the ISPOR Health Economic Evaluation Publication Guidelines – CHEERS: Good Reporting Practices webpage: <http://www.ispor.org/TaskForces/EconomicPubGuidelines.asp>

| Section                         | Item No | Recommendation                                                                                                                                                                          | Reported on page No/line No |
|---------------------------------|---------|-----------------------------------------------------------------------------------------------------------------------------------------------------------------------------------------|-----------------------------|
| <b>Title and Abstract</b>       |         |                                                                                                                                                                                         |                             |
| Title                           | 1       | Identify the study as an economic evaluation or use more specific terms such as “cost-effectiveness analysis”, and describe the interventions compared.                                 | Page-1                      |
| Abstract                        | 2       | Provide a structured summary of objectives, perspective, setting, methods (including study design and inputs), results (including base case and uncertainty analyses), and conclusions. | Page-2                      |
| <b>Introduction</b>             |         |                                                                                                                                                                                         |                             |
| Background and objectives       | 3       | Provide an explicit statement of the broader context for the study.<br>Present the study question and its relevance for health policy or practice decisions.                            | Page-4                      |
| <b>Methods</b>                  |         |                                                                                                                                                                                         |                             |
| Target population and subgroups | 4       | Describe characteristics of the base case population and subgroups analysed, including why they were chosen.                                                                            | Page 4-5                    |
| Setting and location            | 5       | State relevant aspects of the system(s) in which the decision(s) need(s) to be made.                                                                                                    | Page 5                      |
| Study perspective               | 6       | Describe the perspective of the study and relate this to the costs being evaluated.                                                                                                     | Page 5                      |
| Comparators                     | 7       | Describe the interventions or strategies being compared and state why they were chosen.                                                                                                 | Page 5                      |
| Time horizon                    | 8       | State the time horizon(s) over which costs and consequences are being evaluated and say why appropriate.                                                                                | Page 5                      |
| Discount rate                   | 9       | Report the choice of discount rate(s) used for costs and outcomes and say why appropriate.                                                                                              | Page 5                      |
| Choice of health outcomes       | 10      | Describe what outcomes were used as the measure(s) of benefit in the evaluation and their relevance for the type of analysis performed.                                                 | Page 5-6                    |
| Measurement of effectiveness    | 11a     | <i>Single study-based estimates</i> : Describe fully the design features of the single effectiveness study and why the single                                                           | Page 5-6                    |

## Consolidated Health Economic Evaluation Reporting Standards – CHEERS Checklist 2

|                                                        |     |                                                                                                                                                                                                                                                                                                                                                       |        |
|--------------------------------------------------------|-----|-------------------------------------------------------------------------------------------------------------------------------------------------------------------------------------------------------------------------------------------------------------------------------------------------------------------------------------------------------|--------|
|                                                        |     | study was a sufficient source of clinical effectiveness data.                                                                                                                                                                                                                                                                                         |        |
|                                                        | 11b | <i>Synthesis-based estimates</i> : Describe fully the methods used for identification of included studies and synthesis of clinical effectiveness data.                                                                                                                                                                                               |        |
| Measurement and valuation of preference based outcomes | 12  | If applicable, describe the population and methods used to elicit preferences for outcomes.                                                                                                                                                                                                                                                           | Page 6 |
| Estimating resources and costs                         | 13a | <i>Single study-based economic evaluation</i> : Describe approaches used to estimate resource use associated with the alternative interventions. Describe primary or secondary research methods for valuing each resource item in terms of its unit cost. Describe any adjustments made to approximate to opportunity costs.                          |        |
|                                                        | 13b | <i>Model-based economic evaluation</i> : Describe approaches and data sources used to estimate resource use associated with model health states. Describe primary or secondary research methods for valuing each resource item in terms of its unit cost. Describe any adjustments made to approximate to opportunity costs.                          | Page 6 |
| Currency, price date, and conversion                   | 14  | Report the dates of the estimated resource quantities and unit costs. Describe methods for adjusting estimated unit costs to the year of reported costs if necessary. Describe methods for converting costs into a common currency base and the exchange rate.                                                                                        | Page 6 |
| Choice of model                                        | 15  | Describe and give reasons for the specific type of decision-analytical model used. Providing a figure to show model structure is strongly recommended.                                                                                                                                                                                                | Page 6 |
| Assumptions                                            | 16  | Describe all structural or other assumptions underpinning the decision-analytical model.                                                                                                                                                                                                                                                              | Page 6 |
| Analytical methods                                     | 17  | Describe all analytical methods supporting the evaluation. This could include methods for dealing with skewed, missing, or censored data; extrapolation methods; methods for pooling data; approaches to validate or make adjustments (such as half cycle corrections) to a model; and methods for handling population heterogeneity and uncertainty. | Page 6 |
| <b>Results</b>                                         |     |                                                                                                                                                                                                                                                                                                                                                       |        |
| Study parameters                                       | 18  | Report the values, ranges, references, and, if used, probability distributions for all parameters. Report reasons or sources for distributions used to represent uncertainty where appropriate. Providing a table to show the input values is strongly recommended.                                                                                   | Page 7 |
| Incremental costs and outcomes                         | 19  | For each intervention, report mean values for the main categories of estimated costs and outcomes of interest, as well as mean differences between the comparator groups. If                                                                                                                                                                          | Page 7 |

## Consolidated Health Economic Evaluation Reporting Standards – CHEERS Checklist 3

|                                                                      |     |                                                                                                                                                                                                                                                                              |          |
|----------------------------------------------------------------------|-----|------------------------------------------------------------------------------------------------------------------------------------------------------------------------------------------------------------------------------------------------------------------------------|----------|
|                                                                      |     | applicable, report incremental cost-effectiveness ratios.                                                                                                                                                                                                                    |          |
| Characterizing uncertainty                                           | 20a | <i>Single study-based economic evaluation</i> : Describe the effects of sampling uncertainty for the estimated incremental cost and incremental effectiveness parameters, together with the impact of methodological assumptions (such as discount rate, study perspective). |          |
|                                                                      | 20b | <i>Model-based economic evaluation</i> : Describe the effects on the results of uncertainty for all input parameters, and uncertainty related to the structure of the model and assumptions.                                                                                 | Page 7-8 |
| Characterizing heterogeneity                                         | 21  | If applicable, report differences in costs, outcomes, or cost-effectiveness that can be explained by variations between subgroups of patients with different baseline characteristics or other observed variability in effects that are not reducible by more information.   | Page 7-8 |
| <b>Discussion</b>                                                    |     |                                                                                                                                                                                                                                                                              |          |
| Study findings, limitations, generalizability, and current knowledge | 22  | Summarise key study findings and describe how they support the conclusions reached. Discuss limitations and the generalisability of the findings and how the findings fit with current knowledge.                                                                            | Page 8   |
| <b>Other</b>                                                         |     |                                                                                                                                                                                                                                                                              |          |
| Source of funding                                                    | 23  | Describe how the study was funded and the role of the funder in the identification, design, conduct, and reporting of the analysis. Describe other non-monetary sources of support.                                                                                          | Page 13  |
| Conflicts of interest                                                | 24  | Describe any potential for conflict of interest of study contributors in accordance with journal policy. In the absence of a journal policy, we recommend authors comply with International Committee of Medical Journal Editors recommendations.                            | Page 13  |

For consistency, the CHEERS Statement checklist format is based on the format of the CONSORT statement checklist

The **ISPOR CHEERS Task Force Report** provides examples and further discussion of the 24-item CHEERS Checklist and the CHEERS Statement. It may be accessed via the *Value in Health* link or via the ISPOR Health Economic Evaluation Publication Guidelines – CHEERS: Good Reporting Practices webpage: <http://www.ispor.org/TaskForces/EconomicPubGuidelines.asp>

The citation for the CHEERS Task Force Report is:  
 Husereau D, Drummond M, Petrou S, et al. Consolidated health economic evaluation reporting standards (CHEERS)—Explanation and elaboration: A report of the ISPOR health economic evaluations publication guidelines good reporting practices task force. *Value Health* 2013;16:231-50.
