# Supplementary material for: Population-level impact of diabetes integrated care on commissioner payments for inpatient care among people with type 2 diabetes in Cambridgeshire: a postintervention cohort follow-up study
Source: PubMed Central journal article supplement — BMJ Open. 2017 Dec 28;7(12):e015816. doi: 10.1136/bmjopen-2017-015816 (PMC5770819; doi:10.1136/bmjopen-2017-015816), 2017-12-28
Supplement: bmjopen-2017-015816supp001.pdf [file bmjopen-2017-015816supp001.pdf]

**Title:** Population-level impact of diabetes integrated care on payments for inpatient care among people with type 2 diabetes in Cambridgeshire

**Authors:** Dahai Yu <sup>1,2</sup>, Wei Yang <sup>1,3</sup>, Yamei Cai <sup>1</sup>, Zhanzheng Zhao <sup>1\*</sup>, David Simmons <sup>4\*</sup>

1. Department of Nephrology, the First Affiliated Hospital, Zhengzhou University, Zhengzhou 450052, China

2. Arthritis Research UK Primary Care Centre, Research Institute for Primary Care & Health Sciences, Keele University, Keele ST5 5BG, UK

3. School of Medicine, Washington University in St Louis, 660 S Euclid Ave, St. Louis, MO 63110, United States

4. Western Sydney University, Campbelltown, Sydney NSW 2751, Australia

**\*Correspondence 1 (China):**

Professor Zhanzheng Zhao, Department of Nephrology, The First Affiliated Hospital

Zhengzhou University, Zhengzhou 450052, CHINA

Email: [zhanzhengzhao@zzu.edu.cn](mailto:zhanzhengzhao@zzu.edu.cn)

TEL:+86 139 3852 5666

FAX:+86 371 6698 8753

**\*Correspondence 2 (Australia):**

Professor David Simmons, Macarthur Clinical School, School of Medicine, Western Sydney University, Locked Bag 1797, Campbelltown NSW 2751, AUSTRALIA

Email: [dsworkster@gmail.com](mailto:dsworkster@gmail.com)

TEL: (61+2) 4620 3899

FAX: (61+2) 4620 3890

## Online supplemental Technical Appendix

### Estimating intervention impact, and confidence interval estimation

Sarkadi et. al. described a method to assess the population-level impact of interventions using normal distributions to approximate the actual data. After estimating the mean and standard deviation for the normal distributions before and after intervention, the “health gain” is defined as the area between the two distribution curves on the right side, where the distribution density after intervention is lower (the shaded area in supplemental Figure 1 below).

### Online supplemental Figure 1. Normal distribution curves.

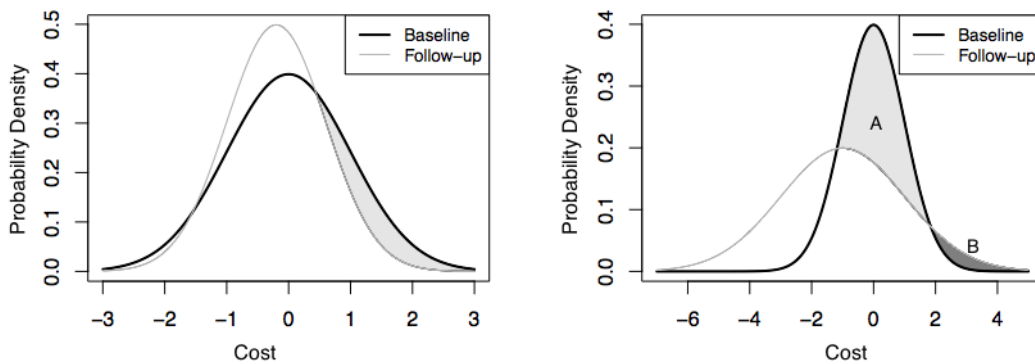

To estimate the confidence interval, Sarkadi et. al. proposed to start from estimating the confidence intervals of mean and standard deviation for the two normal distributions. The point estimation of the mean for the baseline is  $\mu_1$ , and the lower and higher bounds of the confidence interval at a certain level (for example, 95% confidence interval) are  $\mu_{1min}$  and  $\mu_{1max}$ , respectively; the estimation of standard deviation at baseline is  $\sigma_1$ , and the two bounds of confidence interval are  $\sigma_{1min}$  and  $\sigma_{1max}$ . Similarly, for the follow-up data, point estimations are  $\mu_2$  and  $\sigma_2$ , and the confidence bounds for them as  $\mu_{2min}$ ,  $\mu_{2max}$ , and  $\sigma_{2min}$ ,  $\sigma_{2max}$ . Denote the health gain as a function of the parameters for the two normal distributions as  $F(\mu_1, \sigma_1, \mu_2, \sigma_2)$ . Sarkadi et. al. get the lower and higher bounds of confidence interval for the health gain as  $\text{MIN}(F(\mu_{1min}, \sigma_{1max}, \mu_2, \sigma_2), F(\mu_1, \sigma_1, \mu_{2min}, \sigma_{2max}))$ , and  $\text{MAX}(F(\mu_{1max}, \sigma_{1min}, \mu_2, \sigma_2), F(\mu_1, \sigma_1, \mu_{2max}, \sigma_{2min}))$ .

### Modification of the impact estimation

There are a few situations where the original estimation algorithm is ambiguous.

When using real data to estimate parameters for the two normal distributions, it is unlikely that the two curves have the same standard deviation. In this case, the two curves will have to crossover points.

- (1) If the two distributions are shown as in the left graph in Supplemental Figure 1, where the density of the follow-up is always lower compared to the baseline when observed data is larger than the larger of the two crossover points, it is easy to get the health gain estimation as the shaded area.

- (2) However, if the situation is as in the right graph in Supplemental Figure 1, where the density of follow-up is only lower compared to the baseline in the region between the two crossover points, the original method has failed to make a clear definition of the health gain. Here, we will define it as the difference of the two shaded areas A and B.
- (3) The original method only discussed the case where the estimated mean after intervention is no larger than that of the baseline. We need to define health gain estimation even though this is not true, so that we can have negative estimations when calculating confidence intervals. If the estimated mean after intervention increases, we switch the places of the two curves to estimate a positive health gain as previously, and then put a negative sign to this value and take it as the negative health gain.

## Online supplemental Figure 2. The health gain (impact) distribution

The health gain (impact) was defined as percentage of people with type 2 diabetes and hospital admission having reduced inpatient payment after the 3 year integrated care at population level. Distributions of the impact were approximated by bootstrapping. Subjects and their associated inpatient payment were selected by random resampling with replacement from the original data for 10000 times, and the impact was calculated in each resampled dataset. Dashed red line shows the impact in original data. Bootstrap p value was calculated by comparing the impact estimated in the resampled data to 0 (indicated by the solid red line; null hypothesis  $H_0$ : impact  $\leq 0$ , and alternative hypothesis  $H_1$ : impact  $> 0$ ;  $P = [\text{Percentage with impact} \leq 0]$ ).

Left top: East Cambridge and Fenland, <70 years; right top: East Cambridge and Fenland,  $\geq 70$  years;  
 Left middle: Great Cambridge, <70 years; right middle: Great Cambridge,  $\geq 70$  years;  
 Left bottom: Huntingdonshire, <70 years; right bottom: Huntingdonshire,  $\geq 70$  years.

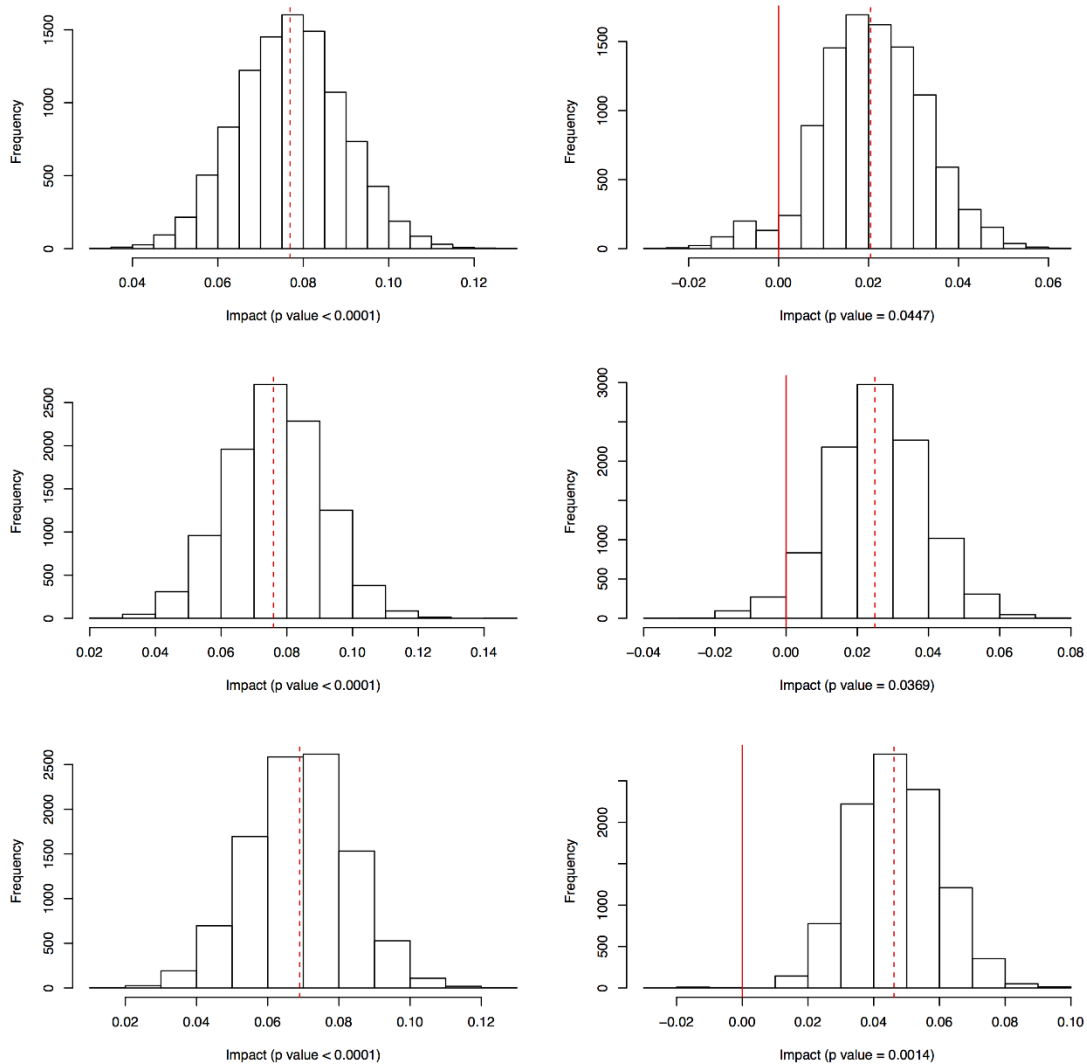

**Online supplemental Table 1. Goodness-of-fit statistics for Normal, Gamma, and log-normal distribution**

|                                          |            | Normal distribution<br>(log transformed<br>inpatient payment) | Gamma<br>distribution | Log<br>Normal<br>distribution | Normal<br>distribution |
|------------------------------------------|------------|---------------------------------------------------------------|-----------------------|-------------------------------|------------------------|
|                                          |            | AIC                                                           |                       |                               |                        |
| East Cambridge and Fenland,<br>2008-2009 | < 70 years | 4138.08                                                       | 4649.35               | 4413.18                       | 5757.95                |
|                                          | ≥70 years  | 4792.04                                                       | 5639.68               | 5494.05                       | 6648.18                |
| East Cambridge and Fenland,<br>2011-2012 | < 70 years | 5125.91                                                       | 5195.19               | 4799.82                       | 6792.39                |
|                                          | ≥70 years  | 6555.80                                                       | 7541.19               | 7287.31                       | 9014.41                |
| Huntingdonshire,<br>2008-2009            | < 70 years | 3088.09                                                       | 3592.87               | 3350.03                       | 4603.81                |
|                                          | ≥70 years  | 3063.47                                                       | 3475.19               | 3319.11                       | 4247.04                |
| Huntingdonshire,<br>2011-2012            | < 70 years | 3910.41                                                       | 4434.23               | 4070.55                       | 5843.54                |
|                                          | ≥70 years  | 4335.50                                                       | 4634.40               | 4371.58                       | 5835.11                |
| Greater Cambridge,<br>2008-2009          | < 70 years | 2987.32                                                       | 3506.21               | 3376.34                       | 4203.61                |
|                                          | ≥70 years  | 3739.02                                                       | 4733.66               | 4663.78                       | 5406.49                |
| Greater Cambridge,<br>2011-2012          | < 70 years | 3647.87                                                       | 4031.53               | 3784.87                       | 5082.50                |
|                                          | ≥70 years  | 4398.30                                                       | 5438.64               | 5317.42                       | 6307.03                |
|                                          |            | BIC                                                           |                       |                               |                        |
| East Cambridge and Fenland,<br>2008-2009 | < 70 years | 4149.13                                                       | 4660.40               | 4424.23                       | 5769.00                |
|                                          | ≥70 years  | 4803.20                                                       | 5650.85               | 5505.21                       | 6659.34                |
| East Cambridge and Fenland,<br>2011-2012 | < 70 years | 5137.38                                                       | 5206.66               | 4811.29                       | 6803.86                |
|                                          | ≥70 years  | 6567.57                                                       | 7552.96               | 7299.08                       | 9026.18                |
| Huntingdonshire,<br>2008-2009            | < 70 years | 3398.76                                                       | 3603.54               | 3360.70                       | 4614.48                |
|                                          | ≥70 years  | 3073.81                                                       | 3485.52               | 3329.44                       | 4257.37                |
| Huntingdonshire,<br>2011-2012            | < 70 years | 3921.50                                                       | 4445.39               | 4081.71                       | 5854.70                |
|                                          | ≥70 years  | 4346.46                                                       | 4645.37               | 4382.55                       | 5846.08                |
| Greater Cambridge,<br>2008-2009          | < 70 years | 2997.81                                                       | 3516.70               | 3386.83                       | 4214.09                |
|                                          | ≥70 years  | 3749.75                                                       | 4744.38               | 4674.50                       | 5417.21                |
| Greater Cambridge,<br>2011-2012          | < 70 years | 3658.76                                                       | 4042.44               | 3795.77                       | 5093.41                |
|                                          | ≥70 years  | 4409.37                                                       | 5449.71               | 5328.49                       | 6318.10                |

|                                          |            | Log likelihood |          |          |          |
|------------------------------------------|------------|----------------|----------|----------|----------|
| Overall                                  |            |                |          |          |          |
| East Cambridge and Fenland,<br>2008-2009 | < 70 years | -2067.04       | -2322.67 | -2204.59 | -2876.97 |
|                                          | ≥70 years  | -2394.02       | -2817.84 | -2745.02 | -3322.09 |
| East Cambridge and Fenland,<br>2011-2012 | < 70 years | -2560.95       | -2595.59 | -2397.91 | -3394.19 |
|                                          | ≥70 years  | -3275.90       | -3768.59 | -3641.66 | -4505.20 |
| Huntingdonshire,<br>2008-2009            | < 70 years | -1692.05       | -1794.44 | -1673.01 | -2299.90 |
|                                          | ≥70 years  | -1529.74       | -1735.59 | -1657.55 | -2121.52 |
| Huntingdonshire,<br>2011-2012            | < 70 years | -1953.21       | -2215.12 | -2033.28 | -2919.77 |
|                                          | ≥70 years  | -2165.75       | -2315.20 | -2183.79 | -2915.56 |
| Greater Cambridge,<br>2008-2009          | < 70 years | -1491.66       | -1751.11 | -1686.17 | -2099.80 |
|                                          | ≥70 years  | -1867.51       | -2364.83 | -2329.89 | -2701.24 |
| Greater Cambridge,<br>2011-2012          | < 70 years | -1821.93       | -2013.77 | -1890.43 | -2539.25 |
|                                          | ≥70 years  | -2197.15       | -2717.32 | -2656.71 | -3151.51 |

AIC, Akaike information criterion; BIC, Bayesian information criterion.

**Online supplemental Table 2. The estimated absolute 'health gain (impact)' after the intervention by age and region: estimation based on Normal-distribution**

|                            |            | Impact, % | 95% confidence interval, % | P value (bootstrapping) |
|----------------------------|------------|-----------|----------------------------|-------------------------|
| East Cambridge and Fenland | < 70 years | 1.58      | (-1.91, 4.88)              | 0.051948                |
|                            | ≥70 years  | 2.74      | (1.29, 5.81)               | 0.014985                |
| Huntingdonshire            | < 70 years | 1.83      | (-2.44, 5.87)              | 0.220779                |
|                            | ≥70 years  | -2.06     | (-5.54, 3.79)              | 0.737263                |
| Greater Cambridge          | < 70 years | 3.20      | (1.77, 7.20)               | 0.004995                |
|                            | ≥70 years  | 4.14      | (2.27, 7.86)               | 0.000999                |

The health gain (impact) was defined as percentage of people with type 2 diabetes and hospital admission having reduced inpatient payment after the integrated care at population level.
